# Supplementary material for: Receptor-mediated mitophagy regulates EPO production and protects against renal anemia
Source: eLife. 2021 May 4;10:e64480. doi: 10.7554/eLife.64480 (PMC8121547; doi:10.7554/eLife.64480)
Supplement: Figure 1—figure supplement 1—source data 1. [file elife-64480-fig1-figsupp1-data1.xlsx]

## Sheet: A
RBC	WT	Fundc1-/-	Bnip3l-/-		WT&Fundc1-/-	WT&Bnip3l-/-
	9.95	10.07	8.23	p value	0.818093	8.7926e-06
	10.18	9.38	7.5
	9.8	9.87	8.15
	9.5	9.6	7.85
	9.5	9.8	7.66
RET%
	WT	Fundc1-/-	Bnip3l-/-
	3.73	3.57	17.06	p value	WT&Fundc1-/-	WT&Bnip3l-/-
	4.05	3.46	21.36		0.64271	6.12143e-08
	4.24	6.42	20.32
	4.3	3.9	18.1
	4	4.3	18.39

## Sheet: B-D
PB	WT	Fundc1-/-	Bnip3l-/-		WT&Fundc1-/-	WT&Bnip3l-/-
	1.5	1.8	29.6	p value	0.391636	3.08749e-05
	2	2.4	33.9
	2.6	4	30.1
SP	20.1	18.3	41.7	p value	0.624001	0.00615915
	16.3	22.1	54.8
	11.5	13.2	38.8
BM	27.8	27.6	30.6	p value	0.629633	0.0132823
	27.4	27.7	30.2
	25.2	26.5	32

## Sheet: E
PB																	WT&Fundc1-/-	WT&Bnip3l-/-
	WT					Fundc1-/-					Bnip3l-/-					p value
R1	0	0	0	0	0.014	0	0	0	0	0.01	0	0	0	0	0		0.821991	0.346594
R2	0	0	0	0.267	0.209	0.1	0	0	0.1	0.739	0.1	0	0	0	0		0.558179	0.261966
R3	1.7	2	1.9	1.92	2.41	1.7	1.5	3.4	3.2	2.39	5.8	6	7	3.6	3.3		0.291664	0.00254942
R4	98.2	97.7	97.9	96.2	94.7	97.9	97.7	96.1	96.4	94.4	94	93.6	92.5	96	96.5		0.642378	0.0416921
SP
	WT					Fundc1-/-					Bnip3l-/-					p value
R1	0.2	0.1	0.3	0.2	0.2	0	1.6	0.1	0.3	0.2	1.6	1.4	3.2	1.8	1.9		0.440886	0.000516318
R2	12.5	8.1	13.3	7.4	12	12.6	18.1	13.1	5.2	7.1	37.8	49.5	41.4	43	42		0.834929	5.83781e-07
R3	2.8	2.6	4.3	4.3	5.2	5.3	4.4	2.8	2.9	2.2	7.5	2.9	2.8	3.2	2.1		0.683877	0.900617
R4	23.4	28.1	35	27	29	23.8	18.7	26.9	28	29	20.8	17.1	18.6	19.1	20.1		0.258688	0.00152565
BM
	WT					Fundc1-/-					Bnip3l-/-					p value
R1	0.5	0.6	0.5	0.4	0.6	0.7	0.6	0.3	0.4	0.3	0.4	0.7	1	0.5	1		0.521227	0.161397
R2	22.2	21.5	21.4	22	21	22.4	25.3	22.4	21.2	20.6	19	24.3	23.8	20	21		0.390482	1
R3	3.6	4	3.5	3.2	3.3	3.9	4.1	3.9	4	3.4	4.7	4	5.2	4	5.1		0.102429	0.00627106
R4	11.1	10.6	15.7	13	12	6.3	11.5	8	13	10	7.9	7.3	6.6	6.3	7.1		0.107209	0.000425718

## Sheet: F
BM
	WT					Fundc1-/-						p value
LSK	0.1	0.1	0.1	0.1	0.2	0.1	0.1	0.1	0.1	0.1		0.346594
LK	1.3	1.4	1.1	1.1	1.2	1.7	1.9	1.4	1.1	1.2		0.174963
CMP	0.5	0.6	0.5	0.6	0.7	0.8	0.6	0.6	0.5	0.7		0.370555
GMP	0.4	0.4	0.4	0.5	0.5	0.4	0.7	0.4	0.4	0.3		1
MEP	0.3	0.3	0.4	0.3	0.3	0.3	0.4	0.3	0.5	0.4		0.195016
BM
	WT					Fundc1-/-
Neutrophil	15.2	19.5	23.3	18	19	15.8	25.3	22.8	18	14.8		0.891504
T	1.2	1.8	1.5	1.4	1.5	1.4	1.8	1.7	1.5	1.8		0.241504
B	13.6	16	16.5	15.3	14.9	20.3	12.3	13.2	12.9	14.1		0.662869
Monocyte	4.5	6.2	5.1	6.1	5.2	4.5	5.3	3.9	4	4.8		0.0564106
SP
Neutrophil	4.4	1.4	0.9	2.3	3	1.4	4.1	5.4	2	3.2		0.411911
T	32.1	24.5	31.4	28.1	29	17.7	31.2	17.6	37.2	27.9		0.525827
B	42.7	50.7	48.6	45	44.9	42.9	39.7	42.2	42.1	49		0.168633
Monocyte	1	0.6	0.7	1	0.7	0.6	1	1.7	1.2	0.8		0.243282
