# Supplementary material for: Receptor-mediated mitophagy regulates EPO production and protects against renal anemia
Source: eLife. 2021 May 4;10:e64480. doi: 10.7554/eLife.64480 (PMC8121547; doi:10.7554/eLife.64480)
Supplement: Figure 1—figure supplement 2—source data 1. [file elife-64480-fig1-figsupp2-data1.xlsx]

## Sheet: A
RET%-PHZ 100 mg/kg	PHZ								PBS
Days	WT			Fundc1-/-			p value		WT			Fundc1-/-			p value
0	3.73	4.05	4.24	3.57	2.61	3.46	0.0786829		3.73	4.05	4.24	3.57	6.42	3.46	0.652203
1	4.38	5.68	4.12	2.23	3.04	2.58	0.0170636		3.21	3.42	4.12	4.11	5.12	3.49	0.297643
2	4.53	5.45	6.42	2.92	3.57	2.98	0.0167165		2.89	3.21	3.9	3.2	2.98	3.2	0.537601
3	8.82	10.98	11.55	4.23	8.59	7.45	0.0754772		3.89	3.4	3.32	4.19	3.29	2.98	0.907531
4	16.13	17.96	21.9	8.14	18.12	14.9	0.219417		3.29	3.99	3	4.11	3.99	3.88	0.133126
5	30.6	34.14	29.59	21.58	34	28.62	0.430142		1.99	2.9	4.21	3.9	3.88	2.99	0.477284
6	55.24	53.17	48.92	43.11	40.8	59	0.469022		2.89	3.88	3.9	3.48	3.77	4.1	0.581483
7	53.3	60.27	52.1	53.57	54	56.8	0.88204		3.22	3.21	3.2	2.9	3.22	4.33	0.562435
HGB-PHZ 100 mg/kg	PHZ								PBS
Days	WT			Fundc1-/-					WT			Fundc1-/-
0	160	165	160	167	156	166	0.748868		160	165	160	167	156	165	0.803987
1	117	125	133	118	114	104	0.104757		161	166	164	165	164	164	0.677869
2	97	95	90	77	85	82	0.0154653		165	169	163	165	163	165	0.518519
3	81	91	79	75	69	67	0.0393519		165	159	169	160	153	169	0.539159
4	84	85	74	64	65	82	0.192596		162	160	161	169	161	165	0.168189
5	95	75	86	63	88	75	0.340468		169	170	164	167	160	163	0.190044
6	90	100	101	69	77	98	0.168537		162	162	161	162	161	163	0.64333
7	101	83	97	70	101	92	0.604992		160	162	166	158	162	159	0.232566

## Sheet: D
	WT					Fundc1-/-					p value
0 h	69.5	70.5	70.2	65.9	68.2	75.7	77.7	92.1	62.9	68.6	0.227565
24 h	62.9	90.7	58.9	59.2	55	91.5	65	74.9	51.2	55.7	0.816754
48 h	40.9	59.1	19.9	35	37	32.3	50.9	46.5	35.6	35.7	0.80787
72 h	20.5	34.5	21.2	30.3	28.2	28.8	23.7	44.5	30.1	29.2	0.355734
72 h+FCCP	7.5	10.3	12.2	18.1	13.7	6.7	16	35.8	13.1	23.7	0.241856

## Sheet: E
0 h		24 h		48 h		72 h
WT	Fundc1-/-	WT	Fundc1-/-	WT	Fundc1-/-	WT	Fundc1-/-
80	66	121	120	145	141	206	220
77	98	133	112	181	153	221	198
78	74	142	123	201	168	219	189
77	67	122	121	146	156	209	180
79	70	130	126	160	145	210	198
0.605025		0.0755659		0.268019		0.0590081		p value

## Sheet: F
R1	WT	Fundc1-/-	p value
	10260000	9360000
	5702400	1838700
	7576200	569400
	8506400	8520000
	6953000	7134000	0.269387
R2
	81720000	55520000
	71456000	19521000
	49348800	9204000
	62496000	22720000
	59714000	23780000	0.00355043
R3
	42300000	37760000
	34936000	17820000
	30553200	20436000
	36456000	22010000
	31902000	34440000	0.0886885
R4
	412000000	426000000
	561000000	602000000
	419000000	573000000
	451000000	352000000
	433000000	411000000	0.760413

## Sheet: G
WT	Fundc1-/-
7.5	5.78
5.61	7.78
4.9	8.29
7.53	7.8
7.07	9.5
0.1426		p value

## Sheet: H-I
% of spleen	MEP				CMP				GMP
	PBS		PHZ		PBS		PHZ		PBS		PHZ
	WT	Fundc1-/-	WT	Fundc1-/-	WT	Fundc1-/-	WT	Fundc1-/-	WT	Fundc1-/-	WT	Fundc1-/-
	0.003687	0.007723	0.001037	0.008933	7.28574e-05	0.000213586	9.81527e-05	5.38565e-05	0.000321	0.000651	4.21e-05	1.79e-05
	0.005	0.001349	0.000609	0.004128	2.26555e-05	4.90444e-05	0.000224098	0.000183325	7.38e-05	0.000236	4.62e-05	1.89e-05
	0.001761	0.001205	0.007153	0.007042	2.46137e-05	3.63077e-05	0.000244457	0.000419819	0.000141	0.000196	3.39e-05	0.000164
	0.004121	0.006803	0.009235	0.004184	0.000111064	0.000128004	7.64307e-05	0.00020766	0.000664	0.000656	3.62e-05	0.000102
	0.006074	0.006011	0.005769	0.005911	9.7276e-05	0.000315872	0.000155302	0.000570227	0.000742	0.00148	2.8e-05	0.000108
			0.003051	0.003834			0.000454918	0.000265925			0.000123	4.2e-05
			0.013562	0.000308			0.000239559	0.000675845			7.79e-05	0.000136
			0.013799	0.010875			3.87727e-05	0.000516918			8.95e-06	0.000149
			0.02263	0.003092			0.000129055	0.000236279			3.4e-05	8.11e-05
			0.006				0.000225943	0.000256896			5.4e-05	3.5e-05
p value	0.762518		0.257348		0.174339		0.0542658		0.367714		0.0812214
Total number (spleen)
	PBS		PHZ		PBS		PHZ		PBS		PHZ
	WT	Fundc1-/-	WT	Fundc1-/-	WT	Fundc1-/-	WT	Fundc1-/-	WT	Fundc1-/-	WT	Fundc1-/-
	147481	301210	8040125	2349812	2914.3	8329.85	88337.4	43085.2	12840.6	25376.2	37885.9	14356.8
	30398.5	56646.3	5579721	493476	860.91	2059.87	197206	148494	2803.67	9926.16	40649.9	15345.1
	68659.7	43863.4	5830743	3632410	959.935	1321.6	202410	327458	5499.29	7120.69	28070.9	128183
	148348	240832	16972717	3632099	3998.3	4531.34	66341.9	147438	23915.1	23216.2	31405	72070.8
	224751	233847	4835191	4730357	3599.21	12287.4	127037	467586	27460.7	57577.2	22879.7	88721.4
			19710389	2562732			341189	223377			92292.7	35284
			10307081	3109715			194282	513642			63156.7	103242
			232168	9383009			29195.9	351504			6742.4	101147
			7373447	6556886			87499.4	177209			23058.5	60841.9
			829243	4680286			171717	200379			41050.4	27337.5
p value	0.434869		0.0874959		0.170966		0.0644238		0.350096		0.098081
