# Supplementary material for: Receptor-mediated mitophagy regulates EPO production and protects against renal anemia
Source: eLife. 2021 May 4;10:e64480. doi: 10.7554/eLife.64480 (PMC8121547; doi:10.7554/eLife.64480)
Supplement: Figure 1—source data 1. [file elife-64480-fig1-data1.xlsx]

## Sheet: B
PHZ 100mg/kg
	Days	WT	Fundc1-/-
	0	0	0
	1	0	0
	2	0	0
	3	0	0
	4	0	1
	4	0	1
	4	0	1
	4	0	1
	5	1	1
	6	0	1
	7	0	0
	7	0	0
	7	0	0
	7	0	0
	7	0	0
	7	0	0
	7	0	0
	7	0	0
	7	0	0
	7	0	0
	7	0	0
	7	0	0
	7	0	0
	7	0	0
	7	0	0
	7	0	0
	7	0	0
	7	0	0
	7	0	0
	7	0	0

## Sheet: C
RBC-PHZ 100mg/kg
Days	WT			Fundc1-/-			p value
0	9.95	10.18	9.8	10.07	9.38	9.87	0.431835
1	6.94	7.68	8.05	6.63	6.9	5.7	0.0787224
2	5.96	5.83	5.67	5.03	4.63	4.47	0.00399581
3	4.65	5.34	4.36	3.82	4.01	3.83	0.0392514
4	4.97	4.68	4.07	3.53	4.7	3.92	0.294647
5	5.48	4.07	4.85	4.53	3.52	4.84	0.427228
6	5.28	6.32	5.96	3.95	4.75	6.24	0.301632
7	5.79	5.2	5.97	4.67	6.32	5.33	0.709374
HCT-PHZ 100mg/kg
Days	WT			Fundc1-/-
0	47	48.4	46.3	46.9	43.6	49.2	0.720873
1	29.1	30.8	32.9	28.1	28.8	27.8	0.0766442
2	25.7	24.5	23.3	21.6	20	22.4	0.0328241
3	21	23.6	20.3	16.5	18.4	18.6	0.034524
4	24	24	21	18.3	18.8	23.5	0.221394
5	30.1	24.4	28.2	20.4	25.8	25.6	0.210037
6	33.2	39.5	36.8	26.3	24.2	36.6	0.15333
7	37.5	31.8	37.6	30.1	32.1	27.1	0.0712822

## Sheet: D
Total erythrocyte number in spleen after PHZ treatment	0 h		24 h		48 h		72 h
	WT	Fundc1-/-	WT	Fundc1-/-	WT	Fundc1-/-	WT	Fundc1-/-
	40000000	39000000	320000000	300000000	900000000	800000000	550000000	545000000
	38000000	42000000	300000000	260000000	880000000	810000000	570000000	495000000
	39000000	36400000	344000000	354000000	828000000	780000000	540000000	550000000
	36000000	35400000	321000000	351000000	868000000	710000000	590000000	489000000
	37000000	38900000	340000000	321000000	818000000	820000000	560000000	550000000
p value	0.807767		0.694389		0.017486		0.0572731

## Sheet: F
Percent of spleen after PHZ treatment				R1		R2		R3		R4
				WT	Fundc1-/-	WT	Fundc1-/-	WT	Fundc1-/-	WT	Fundc1-/-
				1.14	1.17	9.08	6.94	4.7	4.72	45.8	53.2
				0.648	0.227	8.12	2.41	3.97	2.2	63.8	74.3
				0.915	0.073	5.96	1.18	3.69	2.62	50.6	73.5
				0.98	1.2	7.2	3.3	4.2	3.1	52	49.6
				0.85	0.87	7.3	2.9	3.9	4.2	52.9	50.1
			p value	0.449245		0.00511666		0.189955		0.296882

## Sheet: G-I
mitochondria of R2 population in spleen after PHZ treatment
mitochondria mass	PBS		PHZ		mitochondria potential	PBS		PHZ		mitochondria ROS	PBS		PHZ
	WT	Fundc1-/-	WT	Fundc1-/-		WT	Fundc1-/-	WT	Fundc1-/-		WT	Fundc1-/-	WT	Fundc1-/-
	0.936458	0.855765	1.26594	1.2025		0.859222	1.15026	2.29556	2.99967		1.5553	1.16475	2.27446	2.60076
	0.899035	0.851964	1.38612	1.37272		0.911807	1.2465	3.60489	2.41164		0.694701	0.673964	2.95195	2.55548
	1.16451	1.32619	1.40483	0.947861		1.22897	1.15026	2.45629	2.35575		0.750001	0.532259	2.19495	2.12928
	1.11102	0.97021	1.05547	0.870091		0.99887	0.99845	2.50325	2.31639		1.00923	0.98348	2.61078	2.7214
	0.99821	0.98793	1.47705	0.969496		0.98924	1.03255	2.56245	1.92085		0.99874	0.99863	2.63636	1.45178
p value	0.821195		0.0731732			0.16665		0.358657			0.513179		0.39586
