# Supplementary material for: Receptor-mediated mitophagy regulates EPO production and protects against renal anemia
Source: eLife. 2021 May 4;10:e64480. doi: 10.7554/eLife.64480 (PMC8121547; doi:10.7554/eLife.64480)
Supplement: Figure 2—figure supplement 1—source data 1. [file elife-64480-fig2-figsupp1-data1.xlsx]

## Sheet: A
EPO(pg/mL)	0 h		24 h		48 h		72 h
	WT	Fundc1-/-	WT	Fundc1-/-	WT	Fundc1-/-	WT	Fundc1-/-
	209.524	215.873	6116.4	4956.61	6182	5453.75	4357.67	3519.57
	165.079	228.571	6516.4	4865.6	5695.23	4685.5	4973.54	5047.61
	228.571	165.079	6080.42	2298.41	5707.93	4307.4	5862.43	4448.67
	285.714		5771.42	5292.06	5712.16	4890.95	4368.25	3712.17
p value	0.596734		0.0466461		0.0100479		0.205492

## Sheet: B
		PBS										PHZ											PHZ
		WT					Fundc1-/-					WT					Fundc1-/-						WT&Fundc1-/-
	IL-23	1	2	2	1		2	2	1	3		28.92	39.2	27.76	58.34	56.02	54.06	116.76	56.9	39.36	51.98		0.186136
	IL-1a	1	2	2	1		2	2	1	3	1	14.72	14.7	14.1	21.8	20.7	17.5	32.42	20.4	21.28	20.26		0.131823
	IFN-r	2	2	2	1		2	2	1	1	1	33.62	25.04	29.22	56.08	68.08	39.12	129.62	63.3	75.18	58.26		0.116138
	TNF-a	1	2	2	1		2	2	1	3		28.02	28.38	25.84	32.8	47.42	35.3	65.82	38.52	43.38	40.52		0.10541
	MCP-1	2	3	4	3		3	2	2			55.64	65.38	32.12	66.44	61.38	63.54	127.54	67.28	70.94	65.16		0.137536
	IL-12p70	12	12	11			10	12	11			25.46	25.32	17.3	40.4	38.36	34.72	105.44	39.48	28.64	39.36		0.20956
	IL-1b	2	3	4	3		3	2	2			41.58	43.14	28.82	59.86	73.06	60.76	112.18	47.28	49.9	68.3		0.227178
	IL-10	0	0	0			2	1	0			88.96	72.92	44.48	133.24	136.32	177.78	306.08	41.56	75.88	165.38		0.272986
	IL-6	2	3	4	3		3	2	2			22.1	24.24	10.18	87.04	41.92	31.44	145.3	29.56	33.76	38.86		0.495467
	IL-27	1	2	2	1		2	2	1	3	1	57.28	61.28	46.6	76.3	131.52	105.38	165.16	108.14	64.26	139.84		0.102186
	IL-17A	2	2	2	1		2	2	1	2	1	53.06	37.9	25.92	64.24	52.04	52.14	91.52	62.46	44.44	62.94		0.160781
	IFN-b	1	2	2	1		2	2	1	3	1	37.32	45.82	29.28	51.1	77.12	47.16	142.52	68	52.06	71.9		0.176495
	GM-CSF	3	2	2	1		2	2	1	3	1	72.34	86.16	59.98	76.48	78.12	72.68	128.56	87.52	82.04	64.24		0.329073

## Sheet: D
Phlebotomy	Day -3		Day 1		Day 4
RBC	WT	Fundc1-/-	WT	Fundc1-/-	WT	Fundc1-/-
	9.9	10	4.28	5.98	8.16	7.77
	10	9.6	6.53	5.14	8.48	8.6
	9.7	9.87	3.59	3.5	7.29	8.23
	9.9	9.7	3.82	4.51	7.24	7.17
	10	10
p value	0.516465		0.798594		0.743935
HGB	WT	Fundc1-/-	WT	Fundc1-/-	WT	Fundc1-/-
	161	167	71	104	146	136
	162	155	110	92	143	131
	160	160	59	57	126	137
	162	160	61	70	130	129
	166	159
p value	0.387049		0.74145		0.58777

## Sheet: E
Phlebotomy	Day -3		Day 1		Day 4
EPO	WT	Fundc1-/-	WT	Fundc1-/-	WT	Fundc1-/-
	200.864	179.578	3088.66	2600.83	543.108	498.76
	197.317	193.769	3124.13	2281.53	747.106	773.715
	167.16	181.351	2911.26	2902.39	782.585	463.283
			2396.83	2503.27	844.671	489.891
p value	0.774738		0.195255		0.127394

## Sheet: F
SP	Day -3		Day 1		Day 4		BM		Day -3		Day 1		Day 4
R1	WT	Fundc1-/-	WT	Fundc1-/-	WT	Fundc1-/-			WT	Fundc1-/-	WT	Fundc1-/-	WT	Fundc1-/-
	0.2	0.2	1.54	1.63	0.433	0.835		R1	0.5	0.7	3.93	2.34	1.07	1.37
	0.1	0.3	1.15	1.89	0.215	0.411			0.6	0.6	3.02	2.46	1.06	0.832
	0.3	0.1	1.49	1	0.312	0.462			0.5	0.3	2.37	3.69	1.01	0.586
			1.6	1.7	0.328	1.31					2.71	4.43	1.14	0.586
p value	1		0.631462		0.0881626		p value		1		0.725385		0.270788
R2	12.5	12.6	66.5	62.1	36.4	29.3		R2	22.2	22.4	49.9	45.4	42.5	41.2
	8.1	8.1	74.2	55.9	24.5	27.9			21.5	25.3	51.1	45.4	34.3	34.7
	8.3	9.1	73	72.6	49.7	32.9			21.4	22.4	41.8	52.6	22.4	34.7
			74.6	62.9	33.8	31.2					52.1	51.6	41.1	34.7
p value	0.886882		0.068967		0.319104		p value		0.170537		0.993729		0.80593
R3	2.8	5.3	1.42	1.61	10.4	12.5		R3	3.6	3.9	0.571	3.07	6.26	5.86
	2.6	4.4	5.33	0.717	12.9	14.3			4	4.1	0.669	3.55	6.61	7.01
	4.3	2.8	5.25	3.89	4.07	13.3			3.5	3.9	1.82	0.635	3.81	7.01
			4.72	2.18	11	12.7					0.614	0.379	4.87	6.58
p value	0.361505		0.119146		0.11507			p value
R4	23.4	23.8	4.45	4.78	7.06	12.6		R4	11.1	6.3	0.756	2.36	3.01	3.6
	28.1	28.7	3.9	4.93	5.68	9.69			10.6	11.5	1.06	1.37	2.14	2.44
	30	26.9	3.69	3.81	5.86	8.22			15.7	8	1.52	1.44	1.12	2.44
			3.91	2.8	8.29	7.6					1.09	0.738	0.972	3.02
p value	0.787443		0.864566		0.0689354		p value		0.158112		0.354239		0.101911
