# Supplementary material for: Receptor-mediated mitophagy regulates EPO production and protects against renal anemia
Source: eLife. 2021 May 4;10:e64480. doi: 10.7554/eLife.64480 (PMC8121547; doi:10.7554/eLife.64480)
Supplement: Figure 2—source data 1. [file elife-64480-fig2-data1.xlsx]

## Sheet: A
Gene_ID	Gene_name	baseMean	log2FoldChange	lfcSE	stat	pvalue	padj
ENSMUSG00000000001	Gnai3	1916.53	0.14223	0.281797	0.504723	0.613753	0.979733
ENSMUSG00000000028	Cdc45	4021.78	-0.168706	0.293631	-0.574552	0.565595	0.977701
ENSMUSG00000000031	H19	7.18242	-6.32011	2.38518	-2.64974	0.0080553	0.448344
ENSMUSG00000000037	Scml2	68.6165	0.496619	0.667635	0.743847	0.456969	0.9722
ENSMUSG00000000056	Narf	30330.4	-0.3572	0.318533	-1.12139	0.262121	0.952972
ENSMUSG00000000058	Cav2	2.75629	4.91671	3.12042	1.57566	0.115105	NA
ENSMUSG00000000078	Klf6	1011.02	-0.181634	0.484483	-0.374904	0.707732	0.985284
ENSMUSG00000000085	Scmh1	852.51	-0.0155903	0.323064	-0.0482576	0.961511	0.998542
ENSMUSG00000000088	Cox5a	1835.53	-0.614836	0.402161	-1.52883	0.126306	0.922979
ENSMUSG00000000093	Tbx2	57.1695	0.954216	0.675108	1.41343	0.15753	0.940783
ENSMUSG00000000094	Tbx4	4.1158	2.33059	2.54876	0.914398	0.360508	NA
ENSMUSG00000000120	Ngfr	5.76331	-2.20764	1.96591	-1.12296	0.261454	0.952972
ENSMUSG00000000125	Wnt3	2.89481	4.97035	3.1336	1.58615	0.112706	NA
ENSMUSG00000000127	Fer	137.7	-0.690427	0.419087	-1.64746	0.0994644	0.896472
ENSMUSG00000000131	Xpo6	1919.41	0.493791	0.330534	1.49392	0.135197	0.934481
ENSMUSG00000000134	Tfe3	2410.7	0.339651	0.393554	0.863035	0.388118	0.966397
ENSMUSG00000000142	Axin2	11.9935	2.6579	1.4366	1.85014	0.0642938	0.839886
ENSMUSG00000000148	Brat1	157.462	0.16404	0.590778	0.277669	0.781267	0.990929
ENSMUSG00000000149	Gna12	1646.74	0.115882	0.271518	0.426794	0.66953	0.98305
ENSMUSG00000000154	Slc22a18	2.10041	1.20176	3.59974	0.333846	0.738496	NA
ENSMUSG00000000157	Itgb2l	29.8764	-1.43619	1.12198	-1.28005	0.200529	0.945896
ENSMUSG00000000159	Igsf5	0.448921	2.33857	4.00532	0.583866	0.55931	NA
ENSMUSG00000000167	Pih1d2	19.2637	-1.36886	1.10284	-1.24121	0.214529	0.947547
ENSMUSG00000000168	Dlat	1422.57	-0.27391	0.333174	-0.822122	0.411008	0.96752
ENSMUSG00000000171	Sdhd	2609.89	-0.442378	0.393196	-1.12508	0.260554	0.952972
ENSMUSG00000000184	Ccnd2	1193.81	-0.297924	0.286963	-1.0382	0.299179	0.955214
ENSMUSG00000000194	Gpr107	817.755	-0.0560082	0.276916	-0.202257	0.839716	0.994229
ENSMUSG00000000197	Nalcn	0.448921	2.33857	4.00532	0.583866	0.55931	NA
ENSMUSG00000000204	Slfn4	37.8446	-0.490025	0.737787	-0.664182	0.506574	0.974468
ENSMUSG00000000223	Drp2	218.957	0.56668	0.438299	1.29291	0.196043	0.945896
ENSMUSG00000000244	Tspan32	1838.94	0.167539	0.293712	0.570419	0.568394	0.977723
ENSMUSG00000000247	Lhx2	0.448921	2.33857	4.00532	0.583866	0.55931	NA
ENSMUSG00000000248	Clec2g	2.702	-0.515004	2.87302	-0.179255	0.857737	NA
ENSMUSG00000000253	Gmpr	5124.59	-1.25038	0.328047	-3.81158	0.000138084	0.0614072
ENSMUSG00000000266	Mid2	0.448921	2.33857	4.00532	0.583866	0.55931	NA
ENSMUSG00000056537	Rlim	2293.06	0.534375	0.2686	1.98948	0.0466481	0.783605
ENSMUSG00000000276	Dgke	259.979	0.230164	0.362438	0.635043	0.5254	0.97479
ENSMUSG00000000278	Scpep1	1321.26	0.184308	0.280913	0.656105	0.511757	0.974468
ENSMUSG00000032178	Ilf3	1744.45	0.559896	0.279777	2.00122	0.0453682	0.771306
ENSMUSG00000000290	Itgb2	623.117	0.347038	0.57779	0.600631	0.548086	0.977701
ENSMUSG00000000295	Hddc2	115.809	-0.849422	0.669623	-1.26851	0.204617	0.945896
ENSMUSG00000000301	Pemt	43.8571	-0.951735	0.75059	-1.26798	0.204804	0.945896
ENSMUSG00000000303	Cdh1	3.55941	2.19415	3.06208	0.716554	0.47365	NA
ENSMUSG00000000305	Cdh4	0.537297	2.57441	3.99083	0.64508	0.518876	NA
ENSMUSG00000000308	Ckmt1	2.20469	4.57744	3.44022	1.33057	0.183332	NA
ENSMUSG00000000317	Bcl6b	30.3432	-1.01148	0.767787	-1.3174	0.187704	0.945896
ENSMUSG00000000318	Clec10a	7.52004	0.165669	1.85302	0.0894045	0.92876	0.997403
ENSMUSG00000000320	Alox12	13.1163	-0.755368	1.2442	-0.607114	0.543775	0.977701
ENSMUSG00000000325	Arvcf	76.2597	-0.542806	0.542443	-1.00067	0.316987	0.959332
ENSMUSG00000000326	Comt	2859.42	-0.295206	0.268991	-1.09746	0.272441	0.953915
ENSMUSG00000000339	Rtca	1026.59	-0.37973	0.385675	-0.984584	0.324828	0.961013
ENSMUSG00000000340	Dbt	91.6715	0.329492	0.687684	0.479133	0.631844	0.979733
ENSMUSG00000000346	Dazap2	21184	0.201864	0.345238	0.584709	0.558744	0.977701
ENSMUSG00000000355	Mcts1	209.111	-0.268331	0.499085	-0.537646	0.590822	0.978563
ENSMUSG00000000359	Rem1	0.64142	-2.83839	3.97528	-0.71401	0.475221	NA
ENSMUSG00000000365	Rnf17	25.213	-0.412677	0.96967	-0.425586	0.67041	0.98305
ENSMUSG00000000374	Trappc10	12335.8	0.0988829	0.339859	0.290953	0.771087	0.990929
ENSMUSG00000000378	Ccm2	2033.46	0.0892452	0.264754	0.337088	0.736051	0.98884
ENSMUSG00000000384	Tbrg4	1418.19	-0.0446738	0.283941	-0.157335	0.874981	0.996155
ENSMUSG00000000385	Tmprss2	2.05106	-4.51046	3.92839	-1.14817	0.250899	NA
ENSMUSG00000000386	Mx1	13.3372	0.884596	1.03208	0.857096	0.391392	0.966617
ENSMUSG00000000392	Fap	13.6796	1.43734	1.0225	1.40571	0.15981	0.940783
ENSMUSG00000000399	Ndufa9	3670.04	-0.374697	0.301433	-1.24305	0.213848	0.946042
ENSMUSG00000000409	Lck	719.499	-0.324254	0.366338	-0.885121	0.376091	0.965265
ENSMUSG00000025764	Jade1	1164	0.589652	0.287547	2.05062	0.0403037	0.733637
ENSMUSG00000000416	Cttnbp2	32.828	-0.930825	0.776408	-1.19889	0.230572	0.950083
ENSMUSG00000000420	Galnt1	26619.7	0.0288444	0.380804	0.0757461	0.939621	0.997825
ENSMUSG00000000439	Mkrn2	592.063	0.168712	0.296097	0.569787	0.568822	0.977723
ENSMUSG00000000440	Pparg	24.3343	1.73473	1.0342	1.67736	0.0934726	0.888801
ENSMUSG00000000441	Raf1	2442.03	0.10521	0.270577	0.388834	0.697399	0.985194
ENSMUSG00000000486	2021-09-01	20093.9	0.265494	0.509959	0.520617	0.602633	0.978563
ENSMUSG00000000489	Pdgfb	20.2567	0.219662	1.21295	0.181097	0.856291	0.995802
ENSMUSG00000000530	Acvrl1	15.0018	2.5613	1.3602	1.88304	0.0596953	0.838254
ENSMUSG00000072872	Rybp	1196.16	0.598623	0.283528	2.11134	0.0347433	0.708613
ENSMUSG00000000532	Acvr1b	65.9754	0.820053	0.802681	1.02164	0.306951	0.957217
ENSMUSG00000000538	Tom1l2	125.811	0.368339	0.513114	0.717851	0.472849	0.973341
ENSMUSG00000000544	Gpa33	1.52527	-4.08329	3.93582	-1.03747	0.299518	NA
ENSMUSG00000000552	Zfp385a	223.95	0.577415	0.374899	1.54019	0.123514	0.921023
ENSMUSG00000000555	Itga5	199.102	0.0715463	0.438838	0.163036	0.87049	0.996155
ENSMUSG00000000561	Wdr77	731.687	-0.248699	0.282354	-0.880804	0.378424	0.966009
ENSMUSG00000000562	Adora3	0.448921	2.33857	4.00532	0.583866	0.55931	NA
ENSMUSG00000000563	Atp5f1	11952.8	-0.456482	0.251309	-1.81642	0.0693064	0.854844
ENSMUSG00000000567	Sox9	0.801774	-3.15954	3.9617	-0.797521	0.425148	NA
ENSMUSG00000000568	Hnrnpd	8962	0.0163526	0.35337	0.0462763	0.96309	0.998543
ENSMUSG00000000579	Dynlt1c	773.36	-0.300127	0.343863	-0.872809	0.382767	0.966397
ENSMUSG00000000581	C1d	987.69	-0.232813	0.449275	-0.518198	0.60432	0.979582
ENSMUSG00000000594	Gm2a	448.847	0.372159	0.709706	0.524384	0.600011	0.978563
ENSMUSG00000000600	Krit1	2531.8	-0.0481161	0.25787	-0.18659	0.851982	0.995311
ENSMUSG00000000605	Clcn4	1571.84	0.218626	0.286114	0.764121	0.444795	0.970219
ENSMUSG00000000617	Grm6	4.65438	-0.371823	2.15	-0.172941	0.862698	NA
ENSMUSG00000000627	Sema4f	9.86279	0.429834	1.59726	0.269108	0.787847	0.991275
ENSMUSG00000000628	Hk2	77.8139	0.129698	0.638103	0.203256	0.838935	0.993961
ENSMUSG00000000631	Myo18a	1683.54	0.283992	0.432835	0.656121	0.511746	0.974468
ENSMUSG00000000673	Haao	131.022	0.430469	0.840627	0.512082	0.608594	0.979733
ENSMUSG00000000682	Cd52	440.759	-0.267459	0.74422	-0.359381	0.71931	0.986186
ENSMUSG00000038225	Primpol	648.579	0.599538	0.293591	2.04209	0.0411428	0.74044
ENSMUSG00000000693	Loxl3	100.014	0.155746	0.578997	0.268994	0.787934	0.991312
ENSMUSG00000000706	Btn1a1	147.806	0.249333	0.44831	0.556162	0.5781	0.978563
ENSMUSG00000000708	Kat2b	3794.92	0.113772	0.29581	0.384612	0.700525	0.985194
ENSMUSG00000000711	Rab5b	3035.83	-0.301078	0.28598	-1.0528	0.292435	0.954995
ENSMUSG00000000731	Aire	1.74798	4.2608	3.68054	1.15766	0.247003	NA
ENSMUSG00000000732	Icosl	340.848	0.292339	0.684968	0.426793	0.66953	0.98305
ENSMUSG00000000738	Spg7	2231.6	0.0639499	0.317438	0.201456	0.840342	0.994229
ENSMUSG00000000739	Sult5a1	1.70198	-4.24124	3.74938	-1.13118	0.257978	NA
ENSMUSG00000000740	Rpl13	42377.6	-0.348733	0.306419	-1.13809	0.255082	0.952624
ENSMUSG00000000743	Chmp1a	5950.4	-0.202042	0.274129	-0.737032	0.461103	0.973341
ENSMUSG00000000751	Rpa1	14101.7	-0.184215	0.305833	-0.602339	0.546948	0.977701
ENSMUSG00000000753	Serpinf1	9.11635	-0.189351	1.1404	-0.166038	0.868127	0.996155
ENSMUSG00000000759	Tubgcp3	3671.64	0.101243	0.265354	0.38154	0.702803	0.985194
ENSMUSG00000000776	Polr3d	583.844	-0.295113	0.408108	-0.723125	0.469603	0.973341
ENSMUSG00000000782	Tcf7	194.936	0.920143	0.763875	1.20457	0.228368	0.950083
ENSMUSG00000000787	Ddx3x	12528.7	0.160032	0.255367	0.626675	0.530872	0.976048
ENSMUSG00000000791	Il12rb1	4.02449	0.852851	2.97517	0.286657	0.774375	NA
ENSMUSG00000000792	Slc5a5	8.07314	0.543414	1.50145	0.361925	0.717408	0.986186
ENSMUSG00000000794	Kcnn3	1.28284	-3.8364	3.94122	-0.973404	0.330353	NA
ENSMUSG00000000804	Usp32	39139.4	0.217793	0.398819	0.546093	0.585002	0.978563
ENSMUSG00000000811	Txnrd3	67.3881	0.379265	0.562628	0.674095	0.500251	0.974468
ENSMUSG00000000817	Fasl	15.8998	0.555871	0.988872	0.562126	0.57403	0.978563
ENSMUSG00000000823	Zfp512b	219.419	0.534001	0.387488	1.37811	0.16817	0.940783
ENSMUSG00000000826	Dnajc5	1324.07	0.360367	0.272596	1.32198	0.186174	0.945896
ENSMUSG00000000827	Tpd52l2	976.186	-0.255945	0.295114	-0.867274	0.385792	0.966397
ENSMUSG00000000838	Fmr1	5544.21	0.396815	0.283515	1.39963	0.161626	0.940783
ENSMUSG00000000861	Bcl11a	1588.45	0.31292	0.281642	1.11106	0.266544	0.953829
ENSMUSG00000000869	Il4	9.41231	-0.573785	1.21491	-0.472287	0.636722	0.980116
ENSMUSG00000000876	Pxmp4	885.273	-0.336751	0.333673	-1.00922	0.312867	0.958415
ENSMUSG00000000881	Dlg3	37.0288	-0.283996	0.702453	-0.404292	0.685998	0.984615
ENSMUSG00000000884	Gnb1l	226.522	0.00497794	0.371057	0.0134156	0.989296	0.999839
ENSMUSG00000000901	Mmp11	23.7117	0.884557	0.92016	0.961307	0.336398	0.963033
ENSMUSG00000000902	Smarcb1	2220.92	-0.24952	0.267818	-0.931679	0.351502	0.963904
ENSMUSG00000000903	Vpreb3	51.8541	0.277104	0.779032	0.355704	0.722062	0.986193
ENSMUSG00000000915	Hip1r	1016.72	0.659725	0.441811	1.49323	0.135377	0.934481
ENSMUSG00000000916	Nsun5	400.113	-0.833312	0.441616	-1.88696	0.0591657	0.836482
ENSMUSG00000000934	Top1mt	60.6317	0.0320792	0.644326	0.0497872	0.960292	0.998383
ENSMUSG00000000942	Hoxa4	0.847374	-3.23478	3.95893	-0.817084	0.41388	NA
ENSMUSG00000000948	Gm38393	0.268649	1.73003	4.03442	0.428818	0.668056	NA
ENSMUSG00000000957	Mmp14	373.122	0.375666	0.382966	0.98094	0.326623	0.961452
ENSMUSG00000000958	Slc7a7	139.685	0.611778	0.509144	1.20158	0.229526	0.950083
ENSMUSG00000000959	Oxa1l	1049.1	-0.108605	0.366066	-0.296682	0.766709	0.990929
ENSMUSG00000000976	Heatr6	365.952	-0.0734548	0.40411	-0.181769	0.855764	0.995632
ENSMUSG00000000982	Ccl3	273.274	-0.695485	0.74161	-0.937804	0.348345	0.963904
ENSMUSG00000001014	Icam4	9988.35	-0.529841	0.274241	-1.93203	0.0533558	0.822506
ENSMUSG00000001016	Ilf2	3195.11	-0.251179	0.302557	-0.830187	0.406433	0.96752
ENSMUSG00000001017	Chtop	3769.84	-0.14483	0.274781	-0.527075	0.598141	0.978563
ENSMUSG00000001018	Snapin	274.513	0.0948121	0.401455	0.236171	0.8133	0.991746
ENSMUSG00000001020	S100a4	43.2293	-0.765907	1.07079	-0.715273	0.474441	0.973361
ENSMUSG00000001025	S100a6	70.8856	-0.655826	0.799237	-0.820565	0.411894	0.96752
ENSMUSG00000001027	Scn4a	61.9529	0.217064	0.853636	0.254281	0.799278	0.991746
ENSMUSG00000001029	Icam2	86.3522	0.17488	0.656567	0.266355	0.789966	0.991361
ENSMUSG00000001034	Mapk7	495.994	-0.028218	0.394315	-0.071562	0.942951	0.997825
ENSMUSG00000001036	Epn2	11.1457	-0.856921	1.68367	-0.508961	0.61078	0.979733
ENSMUSG00000001039	B9d1	12.1848	-1.31802	1.4839	-0.888214	0.374425	0.963904
ENSMUSG00000001052	Sec24b	543.578	0.224333	0.335542	0.668567	0.503772	0.974468
ENSMUSG00000001053	N4bp3	56.403	1.03519	0.854836	1.21098	0.225903	0.950083
ENSMUSG00000001054	Rmnd5b	539.484	-0.0790799	0.338132	-0.233873	0.815084	0.991746
ENSMUSG00000001056	Nhp2	2328.84	-0.553368	0.468866	-1.18023	0.237909	0.950628
ENSMUSG00000001062	Vps9d1	276.966	0.191847	0.328338	0.584296	0.559021	0.977701
ENSMUSG00000001065	Zfp276	494.802	-0.164724	0.300197	-0.548721	0.583197	0.978563
ENSMUSG00000001076	C1ql4	3.2977	0.661047	3.15148	0.209758	0.833857	NA
ENSMUSG00000001082	Mfsd10	664.249	-0.0333135	0.295072	-0.1129	0.91011	0.996237
ENSMUSG00000001089	Luzp1	115.668	-0.408628	0.519908	-0.785963	0.431889	0.970219
ENSMUSG00000001098	Kctd10	755.629	0.103167	0.316925	0.325524	0.744785	0.990227
ENSMUSG00000001100	Poldip2	975.649	-0.395818	0.363458	-1.08904	0.276138	0.953915
ENSMUSG00000001103	Sebox	0.537297	2.57441	3.99083	0.64508	0.518876	NA
ENSMUSG00000001105	Ift20	2878.59	-0.468778	0.321958	-1.45602	0.145386	0.940783
ENSMUSG00000001119	Col6a1	1.64915	-4.19717	3.79011	-1.1074	0.268121	NA
ENSMUSG00000001120	Pcbp3	20.7977	0.527185	1.03737	0.508192	0.611318	0.979733
ENSMUSG00000001123	Lgals9	3439.63	0.0352205	0.375883	0.0937007	0.925347	0.997261
ENSMUSG00000001127	Araf	1335	-0.11024	0.263083	-0.419029	0.675195	0.983708
ENSMUSG00000001128	Cfp	245.269	0.940781	0.52769	1.78283	0.0746141	0.864806
ENSMUSG00000001131	Timp1	5.85286	-3.15743	2.69002	-1.17375	0.240493	0.951363
ENSMUSG00000001134	Uxt	717.817	-0.553461	0.315096	-1.75649	0.0790056	0.866125
ENSMUSG00000001138	Cnnm3	616.577	0.0415061	0.4438	0.0935243	0.925487	0.997261
ENSMUSG00000001143	Lman2l	353.78	-0.366899	0.387807	-0.946086	0.344105	0.963904
ENSMUSG00000001150	Mcm3ap	2552.27	0.0100211	0.319358	0.0313789	0.974967	0.999499
ENSMUSG00000001151	Pcnt	4967.73	0.555756	0.374407	1.48437	0.137712	0.938386
ENSMUSG00000001156	Mxd1	53031.9	-0.103293	0.407497	-0.253481	0.799897	0.991746
ENSMUSG00000001157	Gmcl1	390.71	-0.0204327	0.344116	-0.0593774	0.952651	0.997955
ENSMUSG00000001158	Snrnp27	971.708	-0.279821	0.305865	-0.91485	0.36027	0.963904
ENSMUSG00000001166	Oas1c	258.134	0.108598	0.414179	0.262201	0.793167	0.991746
ENSMUSG00000001173	Ocrl	213.661	-0.244848	0.422013	-0.580191	0.561786	0.977701
ENSMUSG00000001175	Calm1	4358.79	-0.273204	0.294229	-0.928543	0.353126	0.963904
ENSMUSG00000001211	Agpat3	1987.05	0.176338	0.285041	0.61864	0.536153	0.977178
ENSMUSG00000001225	Slc26a3	2.4299	1.36821	3.44874	0.396728	0.691568	NA
ENSMUSG00000001227	Sema6b	24.2401	0.627578	1.06894	0.587105	0.557133	0.977701
ENSMUSG00000001228	Uhrf1	26526.1	0.277734	0.272765	1.01822	0.308575	0.957826
ENSMUSG00000001229	Dpp9	1276.42	0.0310216	0.325033	0.0954416	0.923964	0.997261
ENSMUSG00000001240	Ramp2	102.448	-1.56034	3.72748	-0.418605	0.675505	0.983708
ENSMUSG00000001247	Lsr	8.53451	0.727275	2.16695	0.335622	0.737156	0.98884
ENSMUSG00000001248	Gramd1a	501.28	0.292996	0.502799	0.58273	0.560075	0.977701
ENSMUSG00000001249	Hpn	306.387	0.00699055	0.53024	0.0131838	0.989481	0.999839
ENSMUSG00000001260	Gabrg1	0.683686	-2.92399	3.97136	-0.736268	0.461568	NA
ENSMUSG00000001270	Ckb	62.8115	0.317668	1.07773	0.294757	0.768179	0.990929
ENSMUSG00000001280	Sp1	5429.66	0.175164	0.292949	0.597934	0.549884	0.977701
ENSMUSG00000001281	Itgb7	1228.56	-0.119656	0.389543	-0.307169	0.758715	0.990929
ENSMUSG00000001285	Myg1	841.599	-0.587785	0.334835	-1.75545	0.0791828	0.866125
ENSMUSG00000001288	Rarg	22.4205	-0.930196	0.969149	-0.959807	0.337152	0.963562
ENSMUSG00000001289	Pfdn5	2201.83	-0.250603	0.28729	-0.872299	0.383045	0.966397
ENSMUSG00000001300	Efnb2	31.6714	1.52249	0.84787	1.79567	0.0725474	0.86353
ENSMUSG00000001305	Rrp15	124.494	-3.19471	1.69233	-1.88776	NA	NA
ENSMUSG00000001313	Rnd2	30.1382	1.32552	0.820138	1.61621	0.106048	0.903228
ENSMUSG00000001323	Srr	290.487	-0.311994	0.377703	-0.826029	0.408788	0.96752
ENSMUSG00000030557	Mef2a	534.33	0.607498	0.308589	1.96863	0.0489955	0.799013
ENSMUSG00000001334	Fndc5	12.666	-0.900928	1.25346	-0.718755	0.472292	0.973341
ENSMUSG00000001348	Acp5	2982.87	-0.0605178	0.370251	-0.163451	0.870163	0.996155
ENSMUSG00000001349	Cnn1	2.68167	4.84668	3.22929	1.50085	0.133394	NA
ENSMUSG00000001366	Fbxo9	21510.6	-0.175777	0.385859	-0.455547	0.648716	0.980124
ENSMUSG00000001376	Vps50	291.116	-0.1129	0.346049	-0.326256	0.744231	0.990218
ENSMUSG00000001380	Hars	9293.01	-0.348298	0.306385	-1.1368	0.255623	0.952624
ENSMUSG00000001383	Zmat2	7317.14	-0.341248	0.269143	-1.2679	0.204832	0.945896
ENSMUSG00000001403	Ube2c	54728.4	-0.482579	0.259832	-1.85727	0.0632723	0.839886
ENSMUSG00000001415	Smg5	10083.2	0.396284	0.309003	1.28246	0.19968	0.945896
ENSMUSG00000001416	Cct3	7316.63	-0.367543	0.291512	-1.26082	0.207375	0.945896
ENSMUSG00000001418	Glmp	579.842	0.0445077	0.33354	0.13344	0.893845	0.996237
ENSMUSG00000001419	Mef2d	5815.62	0.238763	0.510889	0.467348	0.640251	0.980116
ENSMUSG00000001420	Tmem79	92.6134	-0.679538	0.519046	-1.3092	0.190465	0.945896
ENSMUSG00000001424	Snd1	2413.79	-0.195162	0.317397	-0.614883	0.538632	0.977455
ENSMUSG00000001435	Col18a1	135.327	0.0809526	0.451027	0.179485	0.857557	0.996004
ENSMUSG00000001436	Slc19a1	470.405	-0.343686	0.365434	-0.940486	0.346968	0.963904
ENSMUSG00000001440	Kpnb1	22521.8	0.0579355	0.277149	0.209041	0.834417	0.993669
ENSMUSG00000001441	Npepps	1485.4	-0.0835655	0.333986	-0.250207	0.802428	0.991746
ENSMUSG00000001444	Tbx21	31.0475	0.391644	1.14561	0.341865	0.732453	0.988549
ENSMUSG00000001445	Mrpl10	932.702	-0.373067	0.347979	-1.07209	0.283678	0.954074
ENSMUSG00000001467	Cyp51	648.807	0.0755977	0.297828	0.25383	0.799627	0.991746
ENSMUSG00000001472	Tcf25	4761.46	-0.224544	0.32262	-0.696002	0.486427	0.974468
ENSMUSG00000001473	Tubb6	85.4595	0.430499	0.742837	0.579533	0.562229	0.977701
ENSMUSG00000001482	Def8	691.799	-0.180959	0.284323	-0.636456	0.524479	0.97479
ENSMUSG00000001497	Pax9	67.3893	1.34286	0.806022	1.66603	0.0957072	0.888801
ENSMUSG00000001506	Col1a1	3.88933	-2.83173	2.53629	-1.11648	0.264215	NA
ENSMUSG00000026987	Baz2b	1304.56	0.609922	0.304445	2.00339	0.0451358	0.769881
ENSMUSG00000001508	Sgca	2.77899	4.90689	3.172	1.54694	0.121877	NA
ENSMUSG00000001510	Dlx3	1.34952	0.0125304	3.86302	0.00324368	0.997412	NA
ENSMUSG00000001517	Foxm1	4936.11	0.0220802	0.339509	0.0650357	0.948146	0.997858
ENSMUSG00000001518	Itfg2	468.055	-0.16063	0.357343	-0.449511	0.653063	0.980124
ENSMUSG00000001520	Nrip2	19.8616	0.917537	1.27349	0.720489	0.471224	0.973341
ENSMUSG00000001521	Tulp3	60.7986	-0.197276	0.585288	-0.337058	0.736073	0.98884
ENSMUSG00000001524	Gtf2h4	255.583	-0.478018	0.422463	-1.1315	0.257844	0.952624
ENSMUSG00000001525	Tubb5	68405.5	-0.246854	0.269295	-0.916666	0.359318	0.963904
ENSMUSG00000001542	Ell2	6199.4	-0.0141135	0.30601	-0.0461211	0.963214	0.998543
ENSMUSG00000028381	Ugcg	2657.96	0.611638	0.274615	2.22726	0.0259302	0.642585
ENSMUSG00000001555	Fkbp10	1.09034	-0.465897	3.8981	-0.119519	0.904864	NA
ENSMUSG00000001558	Klhl10	0.847374	-3.23478	3.95893	-0.817084	0.41388	NA
ENSMUSG00000001569	Nom1	1061.36	0.0323854	0.294526	0.109958	0.912443	0.996739
ENSMUSG00000001576	Ergic1	286.128	0.338077	0.483711	0.698924	0.4846	0.974468
ENSMUSG00000001583	Tnk1	950.774	-0.0782947	0.404224	-0.193691	0.846418	0.99442
ENSMUSG00000001588	Acap1	814.075	0.443186	0.642413	0.689878	0.490271	0.974468
ENSMUSG00000001604	Tcea3	1.23453	3.76646	3.94411	0.954959	0.339599	NA
ENSMUSG00000001627	Ifrd1	1550.08	0.147155	0.302276	0.486824	0.626383	0.979733
ENSMUSG00000001630	Stk38l	301.663	-0.109782	0.393119	-0.27926	0.780046	0.990929
ENSMUSG00000001632	Brpf1	2937.68	0.312934	0.298215	1.04936	0.294013	0.954995
ENSMUSG00000001642	Akr1b3	611.149	-0.385913	0.407558	-0.94689	0.343695	0.963904
ENSMUSG00000001655	Hoxc13	0.671622	2.89118	3.9746	0.727414	0.466972	NA
ENSMUSG00000001657	Hoxc8	2.0337	-4.49849	3.92857	-1.14507	0.25218	NA
ENSMUSG00000001661	Hoxc6	0.64142	-2.83839	3.97528	-0.71401	0.475221	NA
ENSMUSG00000001663	Gstt1	349.165	0.0191534	0.42466	0.0451029	0.964025	0.998543
ENSMUSG00000001665	Gstt3	6.37547	1.16542	1.65315	0.704974	0.480827	0.974468
ENSMUSG00000001666	Ddt	244.637	-0.67972	0.392497	-1.73179	0.0833115	0.873094
ENSMUSG00000001672	Marveld3	4.13591	5.46928	2.87189	1.90442	0.0568556	NA
ENSMUSG00000001674	Ddx18	1452.93	-0.405603	0.36687	-1.10558	0.26891	0.953915
ENSMUSG00000001687	Ubl3	406.928	0.728899	0.474849	1.53501	0.124781	0.921023
ENSMUSG00000001700	Gramd3	266.14	1.07263	0.682994	1.57048	0.116304	0.920112
ENSMUSG00000001707	Eef1e1	1196.99	-0.665765	0.472304	-1.40961	0.158655	0.940783
ENSMUSG00000001729	Akt1	4663.62	0.0305463	0.255038	0.119772	0.904664	0.996237
ENSMUSG00000001739	Cldn15	33.1644	-0.280849	0.795813	-0.352908	0.724157	0.986738
ENSMUSG00000001741	Il16	267.193	0.831735	0.662392	1.25565	0.209241	0.945896
ENSMUSG00000001750	Tcirg1	375.528	-0.120754	0.590139	-0.20462	0.837869	0.993683
ENSMUSG00000001751	Naglu	143.057	0.311186	0.460894	0.675179	0.499562	0.974468
ENSMUSG00000001755	Coasy	452.229	-0.256458	0.384032	-0.667804	0.504259	0.974468
ENSMUSG00000001761	Smo	311.513	0.260627	0.411833	0.632846	0.526834	0.974961
ENSMUSG00000001763	Tspan33	74856.4	0.0261575	0.323381	0.0808877	0.935531	0.997825
ENSMUSG00000001767	Crnkl1	3064.9	-0.0852811	0.280035	-0.304538	0.760718	0.990929
ENSMUSG00000069495	Epc2	2128.78	0.615012	0.297	2.07075	0.0383825	0.730434
ENSMUSG00000001774	Chordc1	1700.93	-0.497199	0.281698	-1.76501	0.0775623	0.866125
ENSMUSG00000001783	Rtcb	2636.14	-0.256083	0.321072	-0.797585	0.425111	0.968795
ENSMUSG00000001785	Pwp1	648.822	-0.328963	0.379474	-0.866894	0.386	0.966397
ENSMUSG00000001786	Fbxo7	11836.5	-0.00671816	0.288522	-0.0232847	0.981423	0.999649
ENSMUSG00000001794	Capns1	6239.08	-0.644523	0.299128	-2.15467	0.0311875	0.683867
ENSMUSG00000001827	Folr1	83.3911	0.153976	0.68318	0.225381	0.821683	0.991746
ENSMUSG00000001829	Clpb	667.172	-0.408093	0.317783	-1.28419	0.199076	0.945896
ENSMUSG00000001833	2021-09-07	5372.98	-0.307385	0.269435	-1.14085	0.253932	0.952624
ENSMUSG00000001844	Zdhhc4	687.75	0.0794026	0.318687	0.249155	0.803241	0.991746
ENSMUSG00000001847	Rac1	6198.88	-0.096949	0.248212	-0.390589	0.696101	0.98501
ENSMUSG00000001855	Nup214	3464.23	0.093601	0.363221	0.257697	0.796641	0.991746
ENSMUSG00000001864	Aif1l	0.448921	2.33857	4.00532	0.583866	0.55931	NA
ENSMUSG00000001865	Cpa3	4.71262	-0.383511	2.47308	-0.155074	0.876763	NA
ENSMUSG00000001870	Ltbp1	7.97018	0.434469	1.88983	0.229898	0.818171	0.991746
ENSMUSG00000001891	Ugp2	335.137	-0.181897	0.370678	-0.490713	0.623629	0.979733
ENSMUSG00000001901	Kcnh6	22.0854	1.62459	0.934033	1.73932	0.0819777	0.866817
ENSMUSG00000001909	Trmt1	940.873	-0.256462	0.300958	-0.852152	0.39413	0.966617
ENSMUSG00000001910	Nacc1	2473.64	0.0662375	0.32634	0.202971	0.839158	0.994037
ENSMUSG00000001911	Nfix	2016.45	0.204613	0.563904	0.36285	0.716717	0.986186
ENSMUSG00000001918	Slc1a5	52240.7	0.00424464	0.328414	0.0129247	0.989688	0.999839
ENSMUSG00000001924	Uba1	44382.6	-0.296023	0.409206	-0.723409	0.469429	0.973341
ENSMUSG00000001930	Vwf	1610.59	0.544818	0.332989	1.63614	0.10181	0.899301
ENSMUSG00000001942	Siae	141.637	0.226278	0.440996	0.513108	0.607876	0.979733
ENSMUSG00000001946	Esam	4.53036	0.967816	2.13352	0.453624	0.650099	NA
ENSMUSG00000001948	Spa17	40.4649	-0.0725742	0.707468	-0.102583	0.918294	0.997187
ENSMUSG00000001962	Fam50a	1515.16	-0.301511	0.300483	-1.00342	0.315658	0.959029
ENSMUSG00000001964	Emd	1861.96	-0.416568	0.319673	-1.30311	0.192538	0.945896
ENSMUSG00000001983	Taco1	354.808	-0.363311	0.343687	-1.0571	0.290465	0.954995
ENSMUSG00000001986	Gria3	3.67837	-3.47617	2.63644	-1.31851	0.187333	NA
ENSMUSG00000001988	Npas1	13.4656	-0.167434	1.19067	-0.140622	0.888169	0.996237
ENSMUSG00000001995	Sipa1l2	68.6024	0.981714	0.634094	1.54822	0.12157	0.921023
ENSMUSG00000001998	Ap4e1	520.779	-0.0115927	0.37029	-0.0313071	0.975025	0.999499
ENSMUSG00000001999	Blvra	1924.96	-0.325839	0.339285	-0.960368	0.33687	0.963562
ENSMUSG00000002006	Pdzd4	12.0628	-0.00197816	1.09376	-0.00180859	0.998557	0.999891
ENSMUSG00000002007	Srpk3	132.777	0.659141	0.823056	0.800846	0.423221	0.967819
ENSMUSG00000002010	Idh3g	4186.97	-0.316287	0.252218	-1.25402	0.209835	0.945896
ENSMUSG00000002014	Ssr4	1870.07	-0.542912	0.321109	-1.69074	0.0908858	0.882034
ENSMUSG00000002015	Bcap31	1862.01	-0.343961	0.339328	-1.01365	0.310748	0.957826
ENSMUSG00000002017	Fam98a	1357.03	-0.406886	0.283774	-1.43384	0.151619	0.940783
ENSMUSG00000002020	Ltbp2	112.936	0.59292	0.57446	1.03214	0.302009	0.955214
ENSMUSG00000002028	Kmt2a	2112.24	0.74312	0.482531	1.54005	0.123549	0.921023
ENSMUSG00000002031	Ift46	449.954	0.12472	0.313203	0.398209	0.690476	0.984615
ENSMUSG00000002032	Tmem25	0.341843	-1.92193	4.0351	-0.476304	0.633858	NA
ENSMUSG00000002033	Cd3g	67.9588	0.497603	0.829427	0.599936	0.548549	0.977701
ENSMUSG00000002043	Trappc6a	394.081	-0.685335	0.333786	-2.05322	0.0400513	0.733637
ENSMUSG00000002052	Supt6	6170.88	0.0263139	0.358326	0.0734355	0.94146	0.997825
ENSMUSG00000002055	Spag5	12525.9	-0.0121182	0.274043	-0.0442201	0.964729	0.998588
ENSMUSG00000002057	Foxn1	0.671622	2.89118	3.9746	0.727414	0.466972	NA
ENSMUSG00000002058	Unc119	161.504	0.0428812	0.56017	0.0765503	0.938981	0.997825
ENSMUSG00000002059	Rab34	20.5465	0.663498	1.0494	0.632263	0.527215	0.974961
ENSMUSG00000002064	Sdf2	732.555	-0.539561	0.310873	-1.73563	0.0826291	0.86979
ENSMUSG00000002068	Ccne1	7655.5	0.00767354	0.268	0.0286326	0.977158	0.999649
ENSMUSG00000002083	Bbc3	5682.8	0.32939	0.337266	0.976648	0.328743	0.96198
ENSMUSG00000002100	Mybpc3	4.68022	0.679889	1.7955	0.378662	0.704939	NA
ENSMUSG00000002102	Psmc3	12170.7	-0.413318	0.255752	-1.61609	0.106075	0.903228
ENSMUSG00000002103	Acp2	286.388	0.31068	0.383346	0.810443	0.417686	0.96752
ENSMUSG00000002105	Slc39a13	230.104	-0.321648	0.409814	-0.784863	0.432534	0.970219
ENSMUSG00000002107	Celf2	388.56	1.03444	0.622821	1.66089	0.0967362	0.892493
ENSMUSG00000039046	Usp6nl	1930.64	0.63039	0.282139	2.23433	0.0254616	0.642585
ENSMUSG00000002109	Ddb2	178.542	-0.283532	0.412032	-0.68813	0.491371	0.974468
ENSMUSG00000002111	Spi1	391.995	-0.378163	0.510763	-0.740388	0.459065	0.973157
ENSMUSG00000002129	Sf3a1	4894.23	0.0030526	0.265939	0.0114786	0.990842	0.999839
ENSMUSG00000002147	Stat6	1303.33	0.181197	0.312922	0.57905	0.562555	0.977701
ENSMUSG00000002190	Clgn	203.424	-0.781096	0.486319	-1.60614	0.108243	0.90408
ENSMUSG00000002204	Napsa	478.796	0.135928	0.726921	0.186991	0.851668	0.995311
ENSMUSG00000002205	Vrk3	1851.71	-0.468965	0.269116	-1.74261	0.0814012	0.866125
ENSMUSG00000002210	Smg9	1697.92	0.0621145	0.281799	0.220421	0.825543	0.992291
ENSMUSG00000002221	Paxip1	8064.24	0.170727	0.283537	0.602133	0.547086	0.977701
ENSMUSG00000002222	Rmnd5a	13208.5	0.489254	0.347749	1.40692	0.159451	0.940783
ENSMUSG00000071350	Setdb2	551.644	0.630812	0.317943	1.98404	0.0472515	0.786702
ENSMUSG00000002228	Ppm1j	3.91451	2.2639	2.55521	0.885993	0.375621	NA
ENSMUSG00000002233	Rhoc	12.8979	0.511055	1.01667	0.502677	0.615192	0.979733
ENSMUSG00000002250	Ppard	1177.67	-0.690273	0.309022	-2.23374	0.0255005	0.642585
ENSMUSG00000002257	Def6	413.988	0.243306	0.468079	0.519797	0.603205	0.978678
ENSMUSG00000002265	Peg3	1.60355	-4.15791	3.93436	-1.05682	0.290594	NA
ENSMUSG00000002274	Metrn	437.559	-0.124043	0.421115	-0.294559	0.768331	0.990929
ENSMUSG00000002279	Lmf1	69.4932	0.15065	0.591663	0.254621	0.799015	0.991746
ENSMUSG00000002280	Narfl	574.558	-0.286486	0.317446	-0.902472	0.366806	0.963904
ENSMUSG00000002289	Angptl4	96.3281	-0.464277	0.677064	-0.685721	0.492889	0.974468
ENSMUSG00000002297	Dbf4	5329.94	-0.0417833	0.269747	-0.154898	0.876902	0.996155
ENSMUSG00000002307	Daxx	1136.72	0.0848369	0.281688	0.301173	0.763282	0.990929
ENSMUSG00000002308	Cd320	78.6414	-0.0405599	0.649777	-0.0624211	0.950227	0.997955
ENSMUSG00000002319	Ipo4	801.615	-0.336504	0.35177	-0.956603	0.338768	0.963675
ENSMUSG00000002320	Tm9sf1	1548.52	0.0469557	0.284719	0.16492	0.869007	0.996155
ENSMUSG00000002324	Rec8	236.158	-0.0130315	0.409728	-0.0318053	0.974627	0.999499
ENSMUSG00000002325	Irf9	5607.66	0.464911	0.321941	1.44409	0.148714	0.940783
ENSMUSG00000002326	Gmpr2	418.762	-0.723932	0.322843	-2.24236	0.0249379	0.642585
ENSMUSG00000002329	Mdp1	565.572	-0.283788	0.447763	-0.633791	0.526217	0.974797
ENSMUSG00000002332	Dhrs1	311.87	-0.0758191	0.383438	-0.197735	0.843252	0.994229
ENSMUSG00000002341	Ncan	2.25331	1.33754	3.52842	0.379075	0.704632	NA
ENSMUSG00000002342	Tmem161a	855.415	-0.422352	0.329551	-1.2816	0.199985	0.945896
ENSMUSG00000002343	Armc6	493.785	-0.150667	0.363993	-0.413928	0.678927	0.984371
ENSMUSG00000002345	Borcs8	891.692	-0.496508	0.308802	-1.60785	0.107868	0.90408
ENSMUSG00000002346	Slc25a42	1077.14	-0.231673	0.362381	-0.639309	0.522622	0.97479
ENSMUSG00000002365	Snx9	369.481	0.519718	0.39397	1.31918	0.187108	0.945896
ENSMUSG00000002372	Ranbp3	4726.18	-0.115035	0.265325	-0.433562	0.664606	0.982026
ENSMUSG00000002379	Ndufa11	3216.1	-0.410505	0.293667	-1.39786	0.162155	0.940783
ENSMUSG00000002384	Bmp8b	193.699	0.672424	0.416264	1.61538	0.106229	0.903228
ENSMUSG00000002393	Nr2f6	54.5177	-0.339219	0.765338	-0.443228	0.657601	0.981276
ENSMUSG00000002395	Use1	1294.16	-0.163051	0.331148	-0.492381	0.62245	0.979733
ENSMUSG00000002396	Ocel1	423.278	-0.534128	0.363554	-1.46918	0.141783	0.940783
ENSMUSG00000002409	Dyrk1b	812.093	0.0353009	0.381181	0.0926092	0.926214	0.997261
ENSMUSG00000002413	Braf	2243.48	0.481563	0.356311	1.35152	0.176528	0.944283
ENSMUSG00000002416	Ndufb2	1092.37	-0.210587	0.324298	-0.649365	0.516103	0.97478
ENSMUSG00000002428	Hltf	493.016	-0.401933	0.353386	-1.13738	0.255381	0.952624
ENSMUSG00000002455	Prpf6	4990.23	-0.324079	0.311414	-1.04067	0.29803	0.955214
ENSMUSG00000002458	Rgs19	168.166	0.26568	0.738358	0.359825	0.718978	0.986186
ENSMUSG00000002459	Rgs20	5.1846	2.7377	2.39986	1.14077	0.253964	0.952624
ENSMUSG00000002477	Snrpd1	2234.78	-0.44405	0.422821	-1.05021	0.293623	0.954995
ENSMUSG00000002486	Tchp	509.251	0.143317	0.305942	0.468445	0.639466	0.980116
ENSMUSG00000002489	Tiam1	196.095	0.261522	0.44743	0.584498	0.558885	0.977701
ENSMUSG00000002496	Tsc2	1818.52	0.0773729	0.264012	0.293066	0.769472	0.990929
ENSMUSG00000002500	Rpl3l	1.86021	4.35069	3.59334	1.21077	0.225985	NA
ENSMUSG00000002504	Slc9a3r2	7.05501	-0.971828	1.66783	-0.58269	0.560102	0.977701
ENSMUSG00000002524	Puf60	6289.35	-0.0984069	0.250042	-0.393561	0.693905	0.984615
ENSMUSG00000002546	Golga2	4561.1	-0.108813	0.321167	-0.338806	0.734756	0.98884
ENSMUSG00000002550	Uck1	1536.19	-0.1861	0.266817	-0.697481	0.485502	0.974468
ENSMUSG00000002565	Scin	0.561151	2.65129	3.98657	0.665056	0.506015	NA
ENSMUSG00000002578	Ikzf4	134.571	-0.200628	0.494245	-0.405929	0.684795	0.984615
ENSMUSG00000002580	Mien1	382.431	-0.516386	0.419785	-1.23012	0.218653	0.948351
ENSMUSG00000024975	Pdcd4	1862.1	0.632537	0.288111	2.19546	0.0281305	0.658418
ENSMUSG00000002603	Tgfb1	4079.45	0.127252	0.296379	0.429355	0.667665	0.982601
ENSMUSG00000002608	Ccdc97	2244.38	0.166829	0.3367	0.495481	0.62026	0.979733
ENSMUSG00000002617	Zfp40	13.5429	0.886836	1.05056	0.844153	0.398584	0.967051
ENSMUSG00000002625	Akap8l	3094.63	-0.325742	0.268307	-1.21406	0.224723	0.950083
ENSMUSG00000002635	Pdcd2l	262.667	-0.326128	0.466541	-0.699034	0.484531	0.974468
ENSMUSG00000002658	Gtf2f1	5983.51	-0.153334	0.277422	-0.552712	0.580461	0.978563
ENSMUSG00000002660	Clpp	915.549	-0.510855	0.407399	-1.25394	0.209864	0.945896
ENSMUSG00000002661	Alkbh7	122.763	-0.430745	0.551133	-0.781564	0.434471	0.970219
ENSMUSG00000002664	Pspn	5.86203	0.0994425	1.72624	0.0576063	0.954062	0.997955
ENSMUSG00000002668	Dennd1c	170.834	0.381738	0.723692	0.527486	0.597856	0.978563
ENSMUSG00000002679	Med6	708.763	-0.470929	0.355813	-1.32353	0.18566	0.945896
ENSMUSG00000002699	Lcp2	144.413	0.702086	0.547758	1.28175	0.199932	0.945896
ENSMUSG00000002718	Cse1l	2653.12	-0.129893	0.282588	-0.459657	0.645763	0.980124
ENSMUSG00000002728	Naa20	768.692	0.0819113	0.329924	0.248273	0.803923	0.991746
ENSMUSG00000002731	Prkra	29.7836	0.151954	1.16494	0.130439	0.896219	0.996237
ENSMUSG00000002732	Fkbp7	18.0595	0.14128	1.07535	0.131381	0.895474	0.996237
ENSMUSG00000002733	Plekha3	272.056	0.0771938	0.371263	0.207922	0.83529	0.993669
ENSMUSG00000002741	Ykt6	3303.07	-0.148277	0.262827	-0.564162	0.572644	0.978563
ENSMUSG00000002748	Baz1b	12948.8	0.295836	0.315246	0.93843	0.348023	0.963904
ENSMUSG00000002763	Pex6	757.564	-0.360307	0.400393	-0.899882	0.368183	0.963904
ENSMUSG00000002767	Mrpl2	680.628	-0.385573	0.408349	-0.944224	0.345055	0.963904
ENSMUSG00000002768	Mea1	746.927	-0.620905	0.327389	-1.89653	0.0578897	0.828195
ENSMUSG00000002769	Gnmt	4.43829	0.03383	1.88763	0.0179219	0.985701	NA
ENSMUSG00000002771	Grin2d	5.8595	0.976414	1.66095	0.587865	0.556623	0.977701
ENSMUSG00000002778	Kdelr1	1087.38	-0.0209871	0.331369	-0.0633343	0.9495	0.997955
ENSMUSG00000002781	Tmem143	219.616	-0.447461	0.404046	-1.10745	0.268099	0.953915
ENSMUSG00000002791	Pdxk-ps	12.6516	0.0639965	1.08302	0.0590908	0.95288	0.997955
ENSMUSG00000002797	Ggct	86.8071	-0.155516	0.586004	-0.265383	0.790715	0.991562
ENSMUSG00000002799	Jag2	11.3925	-0.615749	1.19081	-0.517082	0.605099	0.979733
ENSMUSG00000002803	Btbd6	128.82	-0.331765	0.486346	-0.682158	0.495139	0.974468
ENSMUSG00000002804	Nudt14	48.6319	-0.122491	0.641762	-0.190867	0.84863	0.994946
ENSMUSG00000002808	Epdr1	1081.55	0.186186	0.306286	0.607882	0.543266	0.977701
ENSMUSG00000002812	Flii	2383.5	0.103433	0.302815	0.341571	0.732674	0.988549
ENSMUSG00000002814	Top3a	416.941	0.533123	0.315037	1.69225	0.0905975	0.882034
ENSMUSG00000002820	Atg4d	13735.1	-0.253722	0.276788	-0.916664	0.359319	0.963904
ENSMUSG00000002825	Qtrt1	173.495	-0.0319715	0.384461	-0.0831593	0.933725	0.997825
ENSMUSG00000002831	Plin4	2.68041	-1.53985	2.87194	-0.53617	0.591841	NA
ENSMUSG00000002833	Hdgfl2	2818.06	-0.1484	0.260309	-0.57009	0.568617	0.977723
ENSMUSG00000002835	Chaf1a	6359.61	0.0863431	0.277605	0.311028	0.755779	0.990929
ENSMUSG00000002844	Adprh	701.141	-0.176478	0.411602	-0.428757	0.6681	0.982601
ENSMUSG00000002845	Tmem39a	688.377	-0.262962	0.399797	-0.657737	0.510707	0.974468
ENSMUSG00000002846	Timmdc1	500.203	-0.718638	0.341716	-2.10302	0.0354637	0.716011
ENSMUSG00000002847	Pla1a	2.13021	-4.5667	3.4517	-1.32303	0.185825	NA
ENSMUSG00000002870	Mcm2	25357.2	-0.0324111	0.272988	-0.118727	0.905491	0.996237
ENSMUSG00000002871	Tpra1	2052.84	-0.575465	0.337372	-1.70573	0.0880584	0.876365
ENSMUSG00000026896	Ifih1	2348.26	0.64184	0.306581	2.09354	0.0363009	0.725117
ENSMUSG00000002885	Adgre5	1347.24	0.3283	0.314282	1.0446	0.296207	0.955068
ENSMUSG00000002897	Il17ra	1439.27	0.397711	0.322013	1.23508	0.216801	0.948069
ENSMUSG00000002900	Lamb1	3.35764	-0.402994	2.7364	-0.147272	0.882918	NA
ENSMUSG00000002908	Kcnn1	44.7413	-0.245593	1.11444	-0.220374	0.82558	0.992291
ENSMUSG00000002910	Arrdc2	1546.61	-0.395554	0.331486	-1.19328	0.232761	0.950083
ENSMUSG00000002944	Cd36	20371.6	0.310739	0.387298	0.802325	0.422365	0.96752
ENSMUSG00000002948	Map2k7	1017.78	0.670211	0.352528	1.90116	0.0572817	0.82693
ENSMUSG00000002949	Timm44	1134.29	-0.336086	0.351785	-0.955373	0.339389	0.963675
ENSMUSG00000002957	Ap2a2	18737.5	-0.0641548	0.310705	-0.206482	0.836415	0.993683
ENSMUSG00000002963	Pnkp	1286.56	-0.0890854	0.290365	-0.306805	0.758992	0.990929
ENSMUSG00000002968	Med25	2586.79	-0.0477426	0.314088	-0.152004	0.879184	0.996155
ENSMUSG00000002980	Bcam	2.15757	-4.58456	3.43752	-1.33368	0.182308	NA
ENSMUSG00000002981	Clptm1	3871.27	0.373157	0.331745	1.12483	0.260662	0.952972
ENSMUSG00000030779	Rbbp6	3505.91	0.646915	0.309618	2.0894	0.0366722	0.727971
ENSMUSG00000002984	Tomm40	1850.81	-0.327563	0.357887	-0.915269	0.36005	0.963904
ENSMUSG00000002985	Apoe	636.793	0.572769	0.631312	0.907268	0.364265	0.963904
ENSMUSG00000002992	Apoc2	3.04674	-5.08329	3.5984	-1.41265	0.157758	NA
ENSMUSG00000002996	Hbp1	12432.9	0.453458	0.380751	1.19096	0.233671	0.950083
ENSMUSG00000002997	Prkar2b	10284.5	-0.273543	0.282207	-0.969301	0.332395	0.962733
ENSMUSG00000003031	Cdkn1b	13000.3	-0.588974	0.315889	-1.8645	0.0622522	0.838915
ENSMUSG00000003032	Klf4	320.998	-0.18235	1.19293	-0.152859	0.878509	0.996155
ENSMUSG00000003033	Ap1m1	2265.44	-0.327638	0.25468	-1.28647	0.198279	0.945896
ENSMUSG00000003037	Rab8a	4127.08	-0.103461	0.287413	-0.359972	0.718868	0.986186
ENSMUSG00000003038	Hmgn2	8870.05	0.02884	0.297779	0.0968502	0.922845	0.997261
ENSMUSG00000003039	Fam32a	5877.31	0.0480917	0.300005	0.160303	0.872642	0.996155
ENSMUSG00000003062	Stard3nl	251.13	-0.271132	0.501198	-0.540967	0.58853	0.978563
ENSMUSG00000003068	Stk11	26696.2	-0.221762	0.290108	-0.76441	0.444623	0.970219
ENSMUSG00000003070	Efna2	3.74939	2.17376	2.20691	0.984977	0.324635	NA
ENSMUSG00000003072	Atp5d	7740.43	-0.238706	0.265001	-0.900774	0.367709	0.963904
ENSMUSG00000003099	Ppp5c	1986.95	-0.328316	0.27936	-1.17524	0.239897	0.951363
ENSMUSG00000003119	Cdk12	7080	0.320045	0.459881	0.695929	0.486473	0.974468
ENSMUSG00000003123	Lipe	447.869	-0.345036	0.365285	-0.944566	0.34488	0.963904
ENSMUSG00000003131	Pafah1b2	3180.85	0.0557895	0.278859	0.200063	0.841431	0.994229
ENSMUSG00000003134	Tbc1d8	226.458	0.309888	0.391254	0.792039	0.428338	0.970219
ENSMUSG00000003135	Cnot11	1377.76	-0.161912	0.267027	-0.606351	0.544281	0.977701
ENSMUSG00000003153	Slc2a3	1357.02	-0.460905	0.278235	-1.65653	0.0976138	0.894876
ENSMUSG00000003154	Foxj2	932.927	0.164489	0.330077	0.498335	0.618248	0.979733
ENSMUSG00000003161	Sri	3073.94	-0.0820893	0.374778	-0.219034	0.826623	0.992346
ENSMUSG00000003166	Dgcr2	1709.76	0.0857329	0.288874	0.296783	0.766632	0.990929
ENSMUSG00000003184	Irf3	951.123	-0.314308	0.284053	-1.10651	0.268505	0.953915
ENSMUSG00000003190	Bcl2l12	234.144	-0.443627	0.400603	-1.1074	0.268122	0.953915
ENSMUSG00000003198	Zfp959	198.77	-0.229602	0.389633	-0.589278	0.555675	0.977701
ENSMUSG00000003199	Mpnd	147.804	-0.0991458	0.605484	-0.163746	0.869931	0.996155
ENSMUSG00000003200	Sh3gl1	2230.19	-0.093935	0.253727	-0.370221	0.711218	0.986123
ENSMUSG00000003206	Ebi3	21.0682	0.502438	0.916582	0.548165	0.583579	0.978563
ENSMUSG00000003208	Ccdc94	229.038	-0.0265042	0.375292	-0.0706229	0.943698	0.997858
ENSMUSG00000003226	Ranbp2	19152.5	0.364278	0.35792	1.01776	0.30879	0.957826
ENSMUSG00000003227	Edar	2.3765	-1.30469	2.99528	-0.435581	0.663141	NA
ENSMUSG00000003228	Grk5	265.77	-0.0794566	0.35006	-0.22698	0.820439	0.991746
ENSMUSG00000003233	Dvl3	771.849	0.023315	0.389652	0.0598354	0.952287	0.997955
ENSMUSG00000003234	Abcf3	1367.03	-0.282763	0.276605	-1.02226	0.306657	0.957095
ENSMUSG00000003235	Eif2b5	1707.8	-0.317375	0.265528	-1.19526	0.231985	0.950083
ENSMUSG00000003269	Cyth2	2555.08	-0.312813	0.279482	-1.11926	0.263029	0.952972
ENSMUSG00000003271	Sult2b1	0.574299	2.56166	3.99156	0.641769	0.521023	NA
ENSMUSG00000003273	Car11	2.22311	-0.429888	3.54661	-0.121211	0.903524	NA
ENSMUSG00000003279	Dlgap1	0.671622	2.89118	3.9746	0.727414	0.466972	NA
ENSMUSG00000003282	Plag1	100.447	0.654322	0.601371	1.08805	0.276572	0.953915
ENSMUSG00000003283	Hck	207.84	0.157505	0.718198	0.219306	0.826411	0.992346
ENSMUSG00000003299	Mrpl4	2274.85	-0.443193	0.262382	-1.68911	0.0911983	0.882034
ENSMUSG00000003308	Keap1	2669.57	-0.0135303	0.287915	-0.046994	0.962518	0.998543
ENSMUSG00000003309	Ap1m2	6.81871	0.257787	1.77972	0.144846	0.884832	0.996155
ENSMUSG00000003316	Glg1	2978.54	0.455346	0.331323	1.37433	0.169339	0.940783
ENSMUSG00000003341	Atp8b3	26.4526	0.91564	0.756549	1.21029	0.226169	0.950083
ENSMUSG00000003344	Btbd2	196.375	0.210457	0.388187	0.542154	0.587712	0.978563
ENSMUSG00000003345	Csnk1g2	3135.69	0.0074778	0.289788	0.0258044	0.979413	0.999649
ENSMUSG00000003346	Abhd17a	2383.73	-0.695256	0.372076	-1.86859	0.0616806	0.838645
ENSMUSG00000003348	Mob3a	635.773	-0.112685	0.290228	-0.388265	0.69782	0.985194
ENSMUSG00000003352	Cacnb3	6.41044	-1.83914	1.88851	-0.973854	0.330129	0.962733
ENSMUSG00000003355	Fkbp11	18.4399	-1.2196	1.22476	-0.995789	0.319352	0.959332
ENSMUSG00000003360	Ddx23	6313.89	-0.0243178	0.283944	-0.0856426	0.931751	0.997825
ENSMUSG00000003363	Pld3	4810.6	-0.598978	0.349656	-1.71305	0.0867034	0.875789
ENSMUSG00000003378	Grik5	412.983	0.729573	0.413845	1.76292	0.0779148	0.866125
ENSMUSG00000003379	Cd79a	2349.45	0.198381	1.03944	0.190855	0.848639	0.994946
ENSMUSG00000003380	Rabac1	936.397	-0.430338	0.391921	-1.09802	0.272195	0.953915
ENSMUSG00000003382	Etv3	438.256	0.581752	0.400352	1.4531	0.146196	0.940783
ENSMUSG00000003402	Prkcsh	2082.92	-0.178724	0.288684	-0.619098	0.535852	0.977178
ENSMUSG00000003410	Elavl3	5.7589	2.90788	2.31924	1.25381	0.209912	0.945896
ENSMUSG00000003411	Rab3b	8.62554	0.872071	1.24567	0.700082	0.483876	0.974468
ENSMUSG00000003418	St8sia6	37.0945	1.04697	1.1095	0.943643	0.345352	0.963904
ENSMUSG00000003420	Fcgrt	68.1677	0.682362	1.08093	0.631276	0.52786	0.974961
ENSMUSG00000003421	Nosip	1838.62	-0.266059	0.272673	-0.975743	0.329192	0.962113
ENSMUSG00000003423	Pih1d1	1424.77	-0.454605	0.31904	-1.42491	0.154182	0.940783
ENSMUSG00000003429	Rps11	11680.9	-0.24292	0.378245	-0.642229	0.520725	0.97479
ENSMUSG00000003435	Supt5	6125.13	-0.0369021	0.28244	-0.130655	0.896048	0.996237
ENSMUSG00000003436	Dll3	7.50005	3.32276	1.72567	1.92549	0.0541679	0.82693
ENSMUSG00000003437	Paf1	999.529	-0.21531	0.288054	-0.747462	0.454785	0.971017
ENSMUSG00000003438	Timm50	2225.91	-0.14739	0.320604	-0.459725	0.645714	0.980124
ENSMUSG00000003444	Med29	437.972	-0.345527	0.326802	-1.0573	0.290375	0.954995
ENSMUSG00000003452	Bicd1	63.5295	0.460059	0.730679	0.629632	0.528935	0.975377
ENSMUSG00000003458	Ncstn	1366.39	0.0904214	0.306616	0.294901	0.76807	0.990929
ENSMUSG00000003464	Pex19	3092.57	-0.0825157	0.279075	-0.295676	0.767477	0.990929
ENSMUSG00000003469	Phyhip	3634.81	0.392767	0.307073	1.27906	0.200874	0.945896
ENSMUSG00000003484	Cyp4f18	214.158	0.218648	0.707805	0.30891	0.75739	0.990929
ENSMUSG00000003500	Impdh1	358.647	0.130187	0.397318	0.327665	0.743165	0.990218
ENSMUSG00000003518	Dusp3	71.2936	1.8363	1.04385	1.75915	0.0785517	0.866125
ENSMUSG00000003526	Prodh	4.58515	2.51125	2.10283	1.19422	0.232391	NA
ENSMUSG00000003527	Dgcr14	654.743	-0.160473	0.305075	-0.526012	0.59888	0.978563
ENSMUSG00000003528	Slc25a1	370.044	0.202836	0.411082	0.49342	0.621716	0.979733
ENSMUSG00000003531	Dgcr6	60.2029	-1.28719	0.97017	-1.32677	0.184585	0.945896
ENSMUSG00000003534	Ddr1	7.96713	0.463977	2.20293	0.210618	0.833185	0.993669
ENSMUSG00000003541	Ier3	1825.42	-0.840953	0.475303	-1.7693	0.0768441	0.866125
ENSMUSG00000003545	Fosb	2390.13	-0.0100871	0.604832	-0.0166776	0.986694	0.999839
ENSMUSG00000003546	Klc4	484.544	-0.115778	0.353076	-0.327913	0.742977	0.990218
ENSMUSG00000003549	Ercc1	182.551	0.418414	0.411663	1.0164	0.30944	0.957826
ENSMUSG00000003559	As3mt	52.5933	0.0817593	0.592975	0.13788	0.890335	0.996237
ENSMUSG00000003573	Homer3	53.1439	0.64392	0.693127	0.929007	0.352885	0.963904
ENSMUSG00000003575	Crtc1	1164.19	0.0682397	0.388271	0.175753	0.860488	0.996155
ENSMUSG00000003581	Rnf215	321.623	-0.24254	0.33376	-0.72669	0.467416	0.973341
ENSMUSG00000003585	Sec14l2	3371.84	-0.209352	0.331707	-0.631136	0.527951	0.974961
ENSMUSG00000003604	Aven	317.211	-0.280707	0.388138	-0.723215	0.469548	0.973341
ENSMUSG00000003617	Cp	11.2408	1.02423	1.50798	0.679211	0.497004	0.974468
ENSMUSG00000003623	Crot	142.791	-0.0683492	0.522406	-0.130835	0.895905	0.996237
ENSMUSG00000003644	Rps6ka1	13175.3	0.00222873	0.374047	0.00595843	0.995246	0.999891
ENSMUSG00000003660	Snrnp200	9780.95	0.0283361	0.295823	0.0957874	0.923689	0.997261
ENSMUSG00000003662	Ciao1	1410.58	-0.478854	0.311998	-1.5348	0.124834	0.921023
ENSMUSG00000003665	Has1	3.29163	-5.19427	2.97166	-1.74794	0.0804746	NA
ENSMUSG00000003680	Taf6l	1403.42	-0.235342	0.338324	-0.695612	0.486672	0.974468
ENSMUSG00000003721	Insig2	311.618	0.0261778	0.337574	0.0775467	0.938189	0.997825
ENSMUSG00000003731	Kpna6	2539.19	-0.333211	0.282312	-1.1803	0.237883	0.950628
ENSMUSG00000003746	Man1a	4907.01	0.552663	0.366616	1.50747	0.13169	0.933456
ENSMUSG00000003752	Itpkc	390.225	0.601815	0.480486	1.25251	0.210383	0.945896
ENSMUSG00000003762	Coq8b	368.044	-0.287348	0.339797	-0.845646	0.39775	0.967051
ENSMUSG00000003778	Brd8	7637.23	0.13746	0.292969	0.469197	0.638929	0.980116
ENSMUSG00000003779	Kif20a	6488.49	-0.258072	0.296891	-0.869249	0.384711	0.966397
ENSMUSG00000003808	Farsa	3190.3	-0.354148	0.275639	-1.28483	0.198853	0.945896
ENSMUSG00000003809	Gcdh	2535.51	-0.463198	0.264681	-1.75002	0.0801146	0.866125
ENSMUSG00000003810	Mast2	6359.88	0.267086	0.4039	0.661269	0.50844	0.974468
ENSMUSG00000003812	Dnase2a	2311.11	-0.171451	0.292833	-0.58549	0.558218	0.977701
ENSMUSG00000003813	Rad23a	60277.3	-0.418615	0.325205	-1.28723	0.198013	0.945896
ENSMUSG00000003814	Calr	35582.5	-0.10774	0.344838	-0.312438	0.754707	0.990929
ENSMUSG00000003824	Syce2	1492.33	-0.358745	0.376772	-0.952154	0.341019	0.963727
ENSMUSG00000006527	Sfmbt1	2148.51	0.648747	0.316122	2.05221	0.0401495	0.733637
ENSMUSG00000003848	Nob1	810.477	-0.263342	0.346211	-0.760639	0.446873	0.970277
ENSMUSG00000003849	Nqo1	4098.02	-0.644561	0.308934	-2.0864	0.0369424	0.727971
ENSMUSG00000003863	Ppfia3	1.53935	0.293676	3.85088	0.0762622	0.939211	NA
ENSMUSG00000003865	Gys1	54.9778	-0.000651889	0.748771	-0.000870612	0.999305	0.999891
ENSMUSG00000003868	Ruvbl2	1545.53	-0.418428	0.399934	-1.04624	0.295449	0.954995
ENSMUSG00000003872	Lin7b	18.1651	1.23423	0.936984	1.31723	0.187761	0.945896
ENSMUSG00000003873	Bax	2601.38	-0.584413	0.369408	-1.58203	0.113644	0.917732
ENSMUSG00000041415	Dicer1	1388.76	0.649763	0.288557	2.25177	0.024337	0.641995
ENSMUSG00000003923	Tfam	858.445	-0.0138945	0.35296	-0.0393656	0.968599	0.999139
ENSMUSG00000003929	Zfp81	198.659	-0.351622	0.451431	-0.778905	0.436036	0.970219
ENSMUSG00000003934	Efnb3	273.346	0.414296	0.458575	0.903442	0.366291	0.963904
ENSMUSG00000003948	Mmd	78.721	0.400667	0.849585	0.471604	0.63721	0.980116
ENSMUSG00000003949	Hlf	0.897842	3.31437	3.95763	0.837464	0.402332	NA
ENSMUSG00000003955	Fam162a	491.853	-0.374489	0.486573	-0.769646	0.44151	0.970219
ENSMUSG00000003970	Rpl8	46907.7	-0.3739	0.344572	-1.08511	0.277872	0.953915
ENSMUSG00000003974	Grm3	1.20892	3.72914	3.94507	0.945265	0.344523	NA
ENSMUSG00000003992	Ssbp2	3928.47	-0.0680748	0.309299	-0.220094	0.825798	0.992291
ENSMUSG00000004018	Fancl	1678.82	-0.386948	0.32752	-1.18145	0.237424	0.950383
ENSMUSG00000004031	Brinp2	38.8369	-0.690777	0.773519	-0.893032	0.37184	0.963904
ENSMUSG00000004032	Gstm5	6251.14	-0.190636	0.310593	-0.613781	0.53936	0.977455
ENSMUSG00000004040	Stat3	718.759	0.604662	0.402684	1.50158	0.133206	0.933456
ENSMUSG00000004043	Stat5a	521.022	0.260142	0.418666	0.621359	0.534363	0.976661
ENSMUSG00000004044	Cavin1	23.8907	0.170374	0.949638	0.179409	0.857616	0.996004
ENSMUSG00000004054	Map3k11	3345.7	-0.0953819	0.316207	-0.301644	0.762923	0.990929
ENSMUSG00000004056	Akt2	3513.85	0.209418	0.306431	0.683408	0.494349	0.974468
ENSMUSG00000004069	Dnaja3	886.458	-0.325799	0.37067	-0.878949	0.379429	0.966397
ENSMUSG00000004070	Hmox2	414.071	-0.509482	0.36395	-1.39987	0.161552	0.940783
ENSMUSG00000004071	Cdip1	289.924	0.451144	0.438225	1.02948	0.303253	0.955214
ENSMUSG00000004085	Map3k20	3817.34	0.0148447	0.295163	0.0502931	0.959889	0.998383
ENSMUSG00000004096	Cwc15	2467.46	-0.451688	0.30663	-1.47307	0.140732	0.940783
ENSMUSG00000004098	Col5a3	9.29462	-0.973356	1.53266	-0.635076	0.525379	0.97479
ENSMUSG00000004099	Dnmt1	22286.8	0.204523	0.303412	0.674078	0.500262	0.974468
ENSMUSG00000004100	Ppan	1056.92	-0.295763	0.3458	-0.855299	0.392386	0.966617
ENSMUSG00000004105	Angptl2	3.30933	2.06657	2.63906	0.783068	0.433587	NA
ENSMUSG00000004110	Cacna1e	89.0581	1.06499	1.777	0.599317	0.548961	0.977701
ENSMUSG00000004127	Trmt10a	561.579	0.0363211	0.305289	0.118973	0.905297	0.996237
ENSMUSG00000004151	Etv1	2.34202	-0.4243	3.00681	-0.141113	0.887781	NA
ENSMUSG00000004187	Kifc2	64.7165	-0.647004	0.580739	-1.1141	0.265234	0.95347
ENSMUSG00000004207	Psap	18486.6	0.104617	0.290133	0.360581	0.718413	0.986186
ENSMUSG00000004221	Ikbkg	2554	0.534178	0.469024	1.13892	0.254738	0.952624
ENSMUSG00000004233	Wars2	97.6659	-0.140277	0.568871	-0.246588	0.805227	0.991746
ENSMUSG00000036097	Slf2	1635.34	0.650408	0.292251	2.22551	0.0260471	0.642585
ENSMUSG00000004264	Phb2	8317.82	-0.308009	0.359028	-0.857898	0.390949	0.966397
ENSMUSG00000004266	Ptpn6	1126.73	-0.186796	0.456043	-0.409602	0.682098	0.984615
ENSMUSG00000004267	Eno2	2.71859	0.11844	3.37373	0.0351066	0.971995	NA
ENSMUSG00000004268	Emg1	2426.79	-0.889391	0.445384	-1.99691	0.0458353	0.776123
ENSMUSG00000004270	Lpcat3	5950.02	0.0447513	0.27431	0.163141	0.870407	0.996155
ENSMUSG00000004285	Atp6v1f	1827.29	-0.348344	0.30057	-1.15895	0.246477	0.951363
ENSMUSG00000004296	Il12b	2.6296	0.092548	3.35815	0.0275592	0.978014	NA
ENSMUSG00000004317	Clcn5	150.221	-0.0921139	0.464312	-0.198388	0.842741	0.994229
ENSMUSG00000004319	Clcn3	45367.6	0.598075	0.410131	1.45825	0.144771	0.940783
ENSMUSG00000004328	Hif3a	298.598	0.481447	0.596705	0.806844	0.419756	0.96752
ENSMUSG00000004347	Pde1c	1.75877	-1.69977	3.84028	-0.442615	0.658044	NA
ENSMUSG00000004356	Utp20	715.928	0.262971	0.370309	0.710138	0.477619	0.97444
ENSMUSG00000004359	Spic	94.9768	0.751699	0.845304	0.889264	0.373861	0.963904
ENSMUSG00000004364	Cul3	6400.76	0.281162	0.290877	0.966604	0.333742	0.962733
ENSMUSG00000052040	Klf13	4676.64	0.658767	0.32964	1.99845	0.0456683	0.774428
ENSMUSG00000004383	Large1	1.57141	-1.27156	3.86835	-0.32871	0.742375	NA
ENSMUSG00000004393	Ddx56	861.203	-0.282766	0.32881	-0.85997	0.389805	0.966397
ENSMUSG00000004394	Tmed4	385.439	-0.284471	0.418903	-0.679086	0.497083	0.974468
ENSMUSG00000004446	Bid	299.964	0.0487565	0.498959	0.0977164	0.922157	0.997261
ENSMUSG00000004451	Ralb	70.9386	0.0151677	0.59216	0.0256142	0.979565	0.999649
ENSMUSG00000004455	Ppp1cc	8135.96	-0.110935	0.257295	-0.431161	0.666352	0.982601
ENSMUSG00000004460	Dnajb11	6810.4	-0.227908	0.279436	-0.815601	0.414729	0.96752
ENSMUSG00000004462	Tbccd1	2324.68	-0.269379	0.347075	-0.776142	0.437665	0.970219
ENSMUSG00000004473	Clec11a	1.2507	-0.787056	3.88425	-0.202627	0.839426	NA
ENSMUSG00000004500	Zfp324	190.926	-1.41971	0.449241	-3.16024	0.00157641	0.217831
ENSMUSG00000004508	Gab2	440.172	0.0816396	0.388895	0.209927	0.833725	0.993669
ENSMUSG00000004530	Coro1c	2843.36	-0.12938	0.25859	-0.50033	0.616843	0.979733
ENSMUSG00000004535	Tax1bp1	32797.1	0.0625451	0.403117	0.155154	0.8767	0.996155
ENSMUSG00000004542	Psg19	0.677899	-2.91257	3.97187	-0.733298	0.463377	NA
ENSMUSG00000004552	Ctse	81462	-0.260883	0.264976	-0.984554	0.324843	0.961013
ENSMUSG00000004558	Ndrg2	38.3378	0.394874	0.788666	0.500686	0.616592	0.979733
ENSMUSG00000004561	Mettl17	176.883	-0.165478	0.481567	-0.343624	0.731129	0.987954
ENSMUSG00000004562	Arhgef40	1490.39	0.391383	0.320232	1.22219	0.221637	0.949699
ENSMUSG00000004565	Pnpla6	6442.36	-0.0200763	0.387905	-0.0517558	0.958723	0.998383
ENSMUSG00000004567	Mcoln1	1387.31	-0.119352	0.291324	-0.40969	0.682033	0.984615
ENSMUSG00000017550	Atad5	5736.25	0.670492	0.324207	2.0681	0.0386307	0.731042
ENSMUSG00000004591	Pkn2	12687.6	0.446597	0.407406	1.0962	0.272992	0.953915
ENSMUSG00000004609	Cd33	58.008	1.10458	0.774101	1.42692	0.153602	0.940783
ENSMUSG00000004610	Etfb	2046.19	-0.314339	0.287894	-1.09186	0.274897	0.953915
ENSMUSG00000004612	Nkg7	57.412	0.330705	0.978734	0.337891	0.735446	0.98884
ENSMUSG00000004626	Stxbp2	1879.15	-0.102725	0.260542	-0.394275	0.693378	0.984615
ENSMUSG00000004630	Pcp2	0.677899	-2.91257	3.97187	-0.733298	0.463377	NA
ENSMUSG00000004631	Sgce	0.537297	2.57441	3.99083	0.64508	0.518876	NA
ENSMUSG00000004633	Chn2	6.90603	0.420644	1.86361	0.225714	0.821424	0.991746
ENSMUSG00000004637	Wwox	179.685	-0.521266	0.42193	-1.23543	0.21667	0.948069
ENSMUSG00000004642	Slbp	14876.5	0.0237882	0.288538	0.0824437	0.934294	0.997825
ENSMUSG00000004654	Ghrhr	13.6867	-0.622468	1.02654	-0.606377	0.544265	0.977701
ENSMUSG00000004655	Aqp1	96513.1	-0.0449711	0.275286	-0.163362	0.870234	0.996155
ENSMUSG00000004661	Arid3b	409.266	0.0865391	0.326396	0.265135	0.790905	0.99158
ENSMUSG00000004665	Cnn2	582.369	-0.0399857	0.655231	-0.0610253	0.951339	0.997955
ENSMUSG00000004667	Polr2e	1620.84	-0.489698	0.324581	-1.50871	0.131373	0.933456
ENSMUSG00000004668	Abca13	15.2104	-0.450694	1.09276	-0.412437	0.680019	0.984371
ENSMUSG00000004677	Myo9b	2931.29	0.24667	0.371918	0.663238	0.507178	0.974468
ENSMUSG00000004698	Hdac9	51.8658	0.535062	0.900028	0.594494	0.552182	0.977701
ENSMUSG00000004707	Ly9	210.318	0.538014	0.601918	0.893832	0.371412	0.963904
ENSMUSG00000004709	Cd244	27.602	0.178824	1.32408	0.135055	0.892568	0.996237
ENSMUSG00000004730	Adgre1	112.422	1.04576	0.875104	1.19501	0.232082	0.950083
ENSMUSG00000004748	Mtfp1	656.591	-0.39657	0.355664	-1.11501	0.264845	0.95347
ENSMUSG00000004768	Rab23	144.525	-0.61026	0.451986	-1.35017	0.17696	0.944283
ENSMUSG00000004771	Rab11a	2092.5	-0.586425	0.273078	-2.14747	0.0317563	0.685111
ENSMUSG00000004788	Eif2b2	1599.87	-0.44912	0.319262	-1.40674	0.159504	0.940783
ENSMUSG00000004789	Dlst	4186.39	-0.472299	0.38715	-1.21994	0.222488	0.949699
ENSMUSG00000004798	Ulk2	352.073	0.490486	0.330846	1.48252	0.138201	0.938986
ENSMUSG00000004814	Ccl24	1.42272	-1.28438	3.57369	-0.359399	0.719297	NA
ENSMUSG00000004815	Dgkq	166.564	0.0668208	0.424879	0.15727	0.875032	0.996155
ENSMUSG00000004837	Grap	359.777	0.44308	1.17904	0.375797	0.707068	0.985284
ENSMUSG00000004843	Chmp2b	195.225	0.144399	0.451355	0.319924	0.749026	0.99034
ENSMUSG00000004846	Plod3	395.406	-0.449652	0.385327	-1.16694	0.243236	0.951363
ENSMUSG00000004849	Ap1s1	1549.99	-0.561485	0.32595	-1.72261	0.0849592	0.874381
ENSMUSG00000004864	Mapk13	10.5635	-1.44636	1.7728	-0.815864	0.414578	0.96752
ENSMUSG00000004865	Srpk1	1200.74	-0.0664194	0.337004	-0.197088	0.843759	0.994229
ENSMUSG00000004872	Pax3	2.13021	-4.5667	3.4517	-1.32303	0.185825	NA
ENSMUSG00000004880	Lbr	45302.3	0.00731321	0.270933	0.0269927	0.978466	0.999649
ENSMUSG00000004885	Crabp2	3.09574	1.84734	3.20292	0.576768	0.564096	NA
ENSMUSG00000004891	Nes	10.5834	-6.87936	2.60788	-2.63791	0.00834178	0.449951
ENSMUSG00000004894	Hapln2	0.671622	2.89118	3.9746	0.727414	0.466972	NA
ENSMUSG00000004895	Prcc	4323.63	-0.10056	0.276451	-0.363755	0.716041	0.986186
ENSMUSG00000004896	Rrnad1	171.921	-0.259587	0.492092	-0.527517	0.597834	0.978563
ENSMUSG00000004897	Hdgf	29851.3	0.00489018	0.258365	0.0189274	0.984899	0.999649
ENSMUSG00000004902	Slc25a18	62.0127	1.19737	0.765741	1.56368	0.117894	0.921023
ENSMUSG00000004929	Thop1	1002.32	-0.328915	0.34793	-0.945348	0.344481	0.963904
ENSMUSG00000004931	Apba3	188.272	-0.107038	0.412141	-0.259711	0.795086	0.991746
ENSMUSG00000004933	Matk	35.8368	0.183108	1.14028	0.160581	0.872424	0.996155
ENSMUSG00000004934	Pias4	2512.4	-0.0463141	0.281766	-0.164371	0.869439	0.996155
ENSMUSG00000004936	Map2k1	704.204	0.0556595	0.335026	0.166135	0.868051	0.996155
ENSMUSG00000004937	Sgta	2316.58	-0.257432	0.273571	-0.941006	0.346702	0.963904
ENSMUSG00000004945	Tmem242	714.781	-0.168641	0.355832	-0.473934	0.635547	0.980116
ENSMUSG00000004947	Dtx2	157.29	0.286913	0.441113	0.650429	0.515415	0.974604
ENSMUSG00000004951	Hspb1	9.31716	-2.36726	1.50705	-1.57078	0.116233	0.920112
ENSMUSG00000004952	Rasa4	93.0984	0.822724	0.693136	1.18696	0.235244	0.950083
ENSMUSG00000004961	Syt5	5.90638	0.610711	1.71765	0.355551	0.722177	0.986193
ENSMUSG00000004980	Hnrnpa2b1	48660	-0.423085	0.301665	-1.4025	0.160767	0.940783
ENSMUSG00000004988	Fxyd4	3.78127	-1.16164	2.22225	-0.522733	0.60116	NA
ENSMUSG00000004994	Ccdc130	156.151	-0.482641	0.420169	-1.14868	0.250687	0.951363
ENSMUSG00000004996	Mri1	385.023	-0.200903	0.415034	-0.484065	0.62834	0.979733
ENSMUSG00000005034	Prkacb	596.382	0.351378	0.385951	0.910423	0.3626	0.963904
ENSMUSG00000005043	Sgsh	103.46	0.269739	0.618221	0.436315	0.662608	0.981743
ENSMUSG00000005045	Chd5	1.45899	4.00435	3.93849	1.01672	0.309286	NA
ENSMUSG00000005054	Cstb	194.797	-0.0459988	0.459923	-0.100014	0.920333	0.997187
ENSMUSG00000005057	Sh2b2	37.2347	0.686098	0.794608	0.863442	0.387894	0.966397
ENSMUSG00000005069	Pex5	698.464	0.157985	0.302977	0.52144	0.60206	0.978563
ENSMUSG00000005078	Jkamp	131.173	-0.281031	0.43306	-0.648942	0.516376	0.97478
ENSMUSG00000005087	Cd44	1621.75	0.00210563	0.281719	0.00747422	0.994036	0.999839
ENSMUSG00000005089	Slc1a2	2.04644	4.46565	3.51679	1.26981	0.204153	NA
ENSMUSG00000005102	Eif2ak4	340.976	0.516054	0.323701	1.59423	0.110884	0.912654
ENSMUSG00000005103	Wdr1	1845.76	-0.198961	0.260569	-0.763566	0.445126	0.970219
ENSMUSG00000005107	Slc2a9	46.3355	0.40487	0.601218	0.673417	0.500682	0.974468
ENSMUSG00000005124	Wisp1	2.29719	4.62049	3.92753	1.17644	0.239421	NA
ENSMUSG00000005125	Ndrg1	90.9423	-1.38773	0.610065	-2.27473	0.0229221	0.635303
ENSMUSG00000005131	4930550C14Rik	31.4295	0.927927	0.899161	1.03199	0.302076	0.955214
ENSMUSG00000005142	Man2b1	687.647	0.250206	0.469774	0.532609	0.594304	0.978563
ENSMUSG00000005148	Klf5	1250.44	0.540609	0.391972	1.3792	0.167833	0.940783
ENSMUSG00000005150	Wdr83	839.091	-0.321196	0.339747	-0.945399	0.344455	0.963904
ENSMUSG00000005161	Prdx2	289417	-0.454804	0.307533	-1.47888	0.139173	0.940783
ENSMUSG00000005198	Polr2a	18260	0.50785	0.434394	1.1691	0.242363	0.951363
ENSMUSG00000005202	Shbg	0.481065	-2.42459	3.99778	-0.606485	0.544192	NA
ENSMUSG00000005204	Senp3	2346.26	-0.0331751	0.252907	-0.131175	0.895637	0.996237
ENSMUSG00000005220	Corin	1.1486	3.60048	3.9486	0.911838	0.361854	NA
ENSMUSG00000005225	Plekha8	70.7515	0.47243	0.686705	0.687966	0.491474	0.974468
ENSMUSG00000005233	Spc25	4753.16	-0.612082	0.344324	-1.77763	0.0754642	0.866083
ENSMUSG00000005237	Dnah2	12.6418	0.955574	1.36212	0.701536	0.482969	0.974468
ENSMUSG00000005251	Ripk4	0.561151	2.65129	3.98657	0.665056	0.506015	NA
ENSMUSG00000005262	Ufd1	3153.97	-0.283327	0.303171	-0.934546	0.350023	0.963904
ENSMUSG00000005267	Zfp287	22.2604	0.212181	0.918626	0.230976	0.817333	0.991746
ENSMUSG00000005268	Prlr	4.07122	1.01421	2.25913	0.448938	0.653477	NA
ENSMUSG00000005299	Letm1	2554.1	-0.0522254	0.263004	-0.198572	0.842597	0.994229
ENSMUSG00000005312	Ubqln1	4123.81	-0.0667464	0.258329	-0.258377	0.796116	0.991746
ENSMUSG00000005320	Fgfr4	1.23277	3.76043	3.94426	0.953394	0.340391	NA
ENSMUSG00000005338	Cadm3	338.937	-0.324306	0.599719	-0.540763	0.588671	0.978563
ENSMUSG00000005339	Fcer1a	1.12682	-0.540075	3.89463	-0.138672	0.889709	NA
ENSMUSG00000005354	Txn2	1521.26	-0.409198	0.284807	-1.43675	0.150788	0.940783
ENSMUSG00000005360	Slc1a3	7.83426	-1.35333	1.86487	-0.725695	0.468026	0.973341
ENSMUSG00000005362	Crbn	1622.6	0.0517453	0.268502	0.192718	0.84718	0.994533
ENSMUSG00000005364	Il5ra	15.4568	0.558962	1.30243	0.429167	0.667801	0.982601
ENSMUSG00000005370	Msh6	2935.28	0.156493	0.294489	0.531406	0.595137	0.978563
ENSMUSG00000005371	Fbxo11	875.995	0.294303	0.299426	0.982891	0.325661	0.961013
ENSMUSG00000005374	Tbl2	795.467	0.0229393	0.307789	0.0745292	0.940589	0.997825
ENSMUSG00000005378	Bud23	1154.8	-0.167583	0.305804	-0.548008	0.583686	0.978563
ENSMUSG00000005397	Nid1	30.9968	-0.436823	1.03428	-0.422346	0.672773	0.983612
ENSMUSG00000005410	Mcm5	24396.9	-0.0317026	0.279138	-0.113573	0.909576	0.996237
ENSMUSG00000044791	Setd2	3857.71	0.672259	0.33491	2.00728	0.0447198	0.76645
ENSMUSG00000005417	Mprip	2659.96	0.0505134	0.294588	0.171471	0.863853	0.996155
ENSMUSG00000005442	Cic	7295.19	0.364059	0.380943	0.955679	0.339235	0.963675
ENSMUSG00000005447	Pafah1b3	96.6081	0.458011	0.66916	0.684456	0.493687	0.974468
ENSMUSG00000005465	Il27ra	118.858	0.991235	0.786802	1.25983	0.207732	0.945896
ENSMUSG00000005469	Prkaca	1470.78	0.22099	0.336166	0.657382	0.510935	0.974468
ENSMUSG00000005470	Asf1b	10231.9	-0.283646	0.275558	-1.02935	0.303314	0.955214
ENSMUSG00000005474	Myl10	1.2507	-0.787056	3.88425	-0.202627	0.839426	NA
ENSMUSG00000005481	Ddx39	12252	-0.484734	0.267081	-1.81494	0.0695339	0.854844
ENSMUSG00000005483	Dnajb1	8454.17	-0.0126517	0.273916	-0.0461883	0.96316	0.998543
ENSMUSG00000005493	Msh4	9.64114	0.515425	1.79512	0.287125	0.774016	0.990929
ENSMUSG00000005501	Usp40	213.038	0.331701	0.410875	0.807303	0.419492	0.96752
ENSMUSG00000005505	Kbtbd4	278.154	-0.414481	0.429837	-0.964275	0.334908	0.962733
ENSMUSG00000005506	Celf1	8911.39	0.0681475	0.315987	0.215665	0.829249	0.992975
ENSMUSG00000005510	Ndufs3	1545.72	-0.554833	0.284572	-1.94971	0.0512103	0.807252
ENSMUSG00000005514	Por	688.816	0.114604	0.286333	0.400247	0.688975	0.984615
ENSMUSG00000074746	Pdzd8	1558.19	0.675264	0.293228	2.30287	0.0212863	0.61883
ENSMUSG00000005534	Insr	216.161	0.517448	0.520086	0.994928	0.319771	0.959332
ENSMUSG00000005540	Fcer2a	323.296	0.454381	0.79086	0.57454	0.565602	0.977701
ENSMUSG00000005553	Atp4a	2.1389	1.79613	3.06684	0.58566	0.558104	NA
ENSMUSG00000005566	Trim28	5709.5	-0.148062	0.288639	-0.512967	0.607974	0.979733
ENSMUSG00000005575	Ube2m	3859.77	0.0111509	0.295056	0.0377923	0.969853	0.999139
ENSMUSG00000005580	Adcy9	60.1858	0.105178	0.619679	0.16973	0.865222	0.996155
ENSMUSG00000005583	Mef2c	250.404	0.571858	0.653446	0.875141	0.381497	0.966397
ENSMUSG00000005609	Ctr9	1583.9	-0.158604	0.283308	-0.55983	0.575595	0.978563
ENSMUSG00000005610	Eif4g2	32808.2	0.160114	0.277973	0.576005	0.564612	0.977701
ENSMUSG00000005611	Mrvi1	8.08069	0.543665	1.49473	0.363721	0.716066	0.986186
ENSMUSG00000005615	Pcyt1a	8010.23	-0.502353	0.336462	-1.49305	0.135425	0.934481
ENSMUSG00000005621	Zfp592	3770.08	0.414494	0.334041	1.24084	0.214663	0.947547
ENSMUSG00000005625	Psmd4	10101.9	-0.154721	0.327628	-0.472246	0.636751	0.980116
ENSMUSG00000005628	Tmod4	5.303	-1.2236	1.86972	-0.654431	0.512834	0.974468
ENSMUSG00000005640	Insrr	0.402973	2.17921	4.01481	0.542793	0.587272	NA
ENSMUSG00000005649	Cabp5	3.33486	-0.52438	2.68996	-0.19494	0.84544	NA
ENSMUSG00000005656	Snx6	179.649	0.603846	0.562989	1.07257	0.283463	0.954074
ENSMUSG00000005667	Mthfd2	15995.4	-0.315692	0.285985	-1.10388	0.269647	0.953915
ENSMUSG00000005672	Kit	216.089	0.523722	0.453357	1.15521	0.248005	0.951363
ENSMUSG00000005674	Tomm40l	436.565	-0.404326	0.4172	-0.969141	0.332475	0.962733
ENSMUSG00000005677	Nr1i3	3.5185	-0.44148	2.66587	-0.165605	0.868468	NA
ENSMUSG00000005681	Apoa2	0.805946	3.15058	3.96363	0.794871	0.426689	NA
ENSMUSG00000005682	Pan2	3093.95	0.23862	0.318934	0.748179	0.454352	0.971004
ENSMUSG00000005683	Cs	9311.71	-0.261139	0.278692	-0.937017	0.34875	0.963904
ENSMUSG00000005686	Ampd3	10011.4	-0.128774	0.324803	-0.396468	0.69176	0.984615
ENSMUSG00000005687	Bcas2	5780.75	-0.15141	0.307638	-0.492168	0.6226	0.979733
ENSMUSG00000005696	Sh2d1a	5.16259	5.81848	3.06354	1.89927	0.0575294	0.827395
ENSMUSG00000005698	Ctcf	10050.6	0.0333595	0.276764	0.120534	0.90406	0.996237
ENSMUSG00000005699	Pard6a	171.634	0.030209	0.401673	0.075208	0.940049	0.997825
ENSMUSG00000005705	Agrp	5.54177	-3.94837	1.83727	-2.14904	0.0316313	0.685111
ENSMUSG00000005716	Pvalb	1.52527	-4.08329	3.93582	-1.03747	0.299518	NA
ENSMUSG00000005718	Tfap4	177.766	-0.247933	0.532417	-0.465674	0.641449	0.980124
ENSMUSG00000005732	Ranbp1	2610.05	-0.423675	0.391342	-1.08262	0.278977	0.953915
ENSMUSG00000005763	Cd247	47.3574	1.73569	0.988234	1.75635	0.0790278	0.866125
ENSMUSG00000005774	Rfx5	178.501	0.946734	0.657558	1.43977	0.149932	0.940783
ENSMUSG00000005779	Psmb4	8767.84	-0.427817	0.287811	-1.48645	0.13716	0.935622
ENSMUSG00000005800	Mmp8	84.6669	-0.709543	0.828245	-0.856683	0.39162	0.966617
ENSMUSG00000005803	Sqor	103.119	-0.247568	0.636553	-0.38892	0.697335	0.985194
ENSMUSG00000005804	Bloc1s6	335.906	0.266309	0.405767	0.656311	0.511624	0.974468
ENSMUSG00000005813	Metap1	1793.5	-0.248267	0.277321	-0.895234	0.370662	0.963904
ENSMUSG00000005823	Gpr108	591.189	-0.120236	0.336768	-0.357029	0.72107	0.986186
ENSMUSG00000005824	Tnfsf14	11.5346	-0.106002	1.44497	-0.073359	0.94152	0.997825
ENSMUSG00000005836	Gata6	3.35811	5.19572	3.48457	1.49107	0.135944	NA
ENSMUSG00000005846	Rsl1d1	2112.33	-0.439463	0.447411	-0.982236	0.325983	0.961013
ENSMUSG00000005871	Apc	654.509	0.86005	0.464302	1.85235	0.0639753	0.839886
ENSMUSG00000005873	Reep5	5164.8	-0.279559	0.293264	-0.953267	0.340455	0.963675
ENSMUSG00000005881	Ergic3	1491.37	-0.430418	0.283018	-1.52082	0.128306	0.929891
ENSMUSG00000005882	Uqcc1	304.543	-0.207738	0.464193	-0.447526	0.654495	0.980124
ENSMUSG00000005883	Spo11	6.00383	0.0985647	2.0175	0.0488548	0.961035	0.998433
ENSMUSG00000005886	Ncoa2	1516.49	0.528842	0.352696	1.49942	0.133763	0.933456
ENSMUSG00000005892	Trh	4.30724	5.53148	3.27774	1.68759	0.0914904	NA
ENSMUSG00000018412	Kansl1	2118.51	0.676227	0.323412	2.09092	0.0365357	0.727971
ENSMUSG00000005897	Nr2c1	62.1673	0.399355	0.621707	0.642353	0.520644	0.97479
ENSMUSG00000005899	Smpd4	5052.98	0.134597	0.265623	0.506722	0.61235	0.979733
ENSMUSG00000005907	Pex1	156.608	0.262179	0.43981	0.596118	0.551096	0.977701
ENSMUSG00000005917	Otx1	0.561151	2.65129	3.98657	0.665056	0.506015	NA
ENSMUSG00000005936	Kctd20	21554.5	-0.0440402	0.385557	-0.114225	0.909059	0.996237
ENSMUSG00000005947	Itgae	30.3403	-0.505647	0.776109	-0.651515	0.514714	0.974468
ENSMUSG00000005949	Ctns	256.618	0.612449	0.351458	1.7426	0.0814041	0.866125
ENSMUSG00000005950	P2rx5	1.75585	2.17455	3.28338	0.662288	0.507787	NA
ENSMUSG00000005951	Shpk	20.7157	0.64817	0.914755	0.708573	0.47859	0.97444
ENSMUSG00000005958	Ephb3	0.785612	3.12543	3.96462	0.788332	0.430503	NA
ENSMUSG00000005968	Tuft1	118.388	0.102994	0.427752	0.240779	0.809727	0.991746
ENSMUSG00000005973	Rcn1	133.977	-0.132092	0.554207	-0.238345	0.811613	0.991746
ENSMUSG00000005980	Dnase1	34.4293	1.27575	0.803506	1.58773	0.112348	0.916249
ENSMUSG00000005981	Trap1	2197.2	-0.350267	0.324615	-1.07902	0.280578	0.954072
ENSMUSG00000005982	Naa60	563.498	0.286283	0.412141	0.694624	0.487291	0.974468
ENSMUSG00000005983	1700037C18Rik	48.3303	0.0645978	0.633271	0.102007	0.918751	0.997187
ENSMUSG00000005986	Ankrd13d	33.4094	-0.88138	0.778504	-1.13215	0.257573	0.952624
ENSMUSG00000006005	Tpr	7141.07	0.327823	0.25199	1.30094	0.193279	0.945896
ENSMUSG00000006010	BC003331	639.255	0.0190936	0.294676	0.0647951	0.948337	0.997858
ENSMUSG00000006014	Prg4	33.6341	1.0131	0.857365	1.18164	0.237347	0.950383
ENSMUSG00000006019	Dhx34	389.637	0.00351926	0.326712	0.0107717	0.991406	0.999839
ENSMUSG00000006021	Kptn	212.045	-0.362525	0.382613	-0.947497	0.343385	0.963904
ENSMUSG00000006024	Napa	13885.7	-0.251227	0.279624	-0.898447	0.368947	0.963904
ENSMUSG00000006050	Sra1	1278.74	-0.201158	0.283978	-0.708357	0.478724	0.974458
ENSMUSG00000006057	Atp5g1	1910.18	-0.57228	0.426813	-1.34082	0.179978	0.944551
ENSMUSG00000006058	Snf8	2373.61	-0.305171	0.266679	-1.14434	0.252483	0.952624
ENSMUSG00000006095	Tbcb	510.298	-0.35399	0.374598	-0.944986	0.344666	0.963904
ENSMUSG00000006127	Inpp5k	1551.35	0.005714	0.314417	0.0181733	0.985501	0.999839
ENSMUSG00000006134	Crkl	3675.63	0.123028	0.308621	0.398637	0.690161	0.984615
ENSMUSG00000030029	Lrig1	922.993	0.679472	0.328297	2.06969	0.0384815	0.730673
ENSMUSG00000006169	Clint1	13008.2	0.0506855	0.318075	0.159351	0.873392	0.996155
ENSMUSG00000006179	Prss16	5.58729	-0.0297948	1.73755	-0.0171476	0.986319	0.999839
ENSMUSG00000006191	Cdkal1	165.437	-0.484431	0.469699	-1.03137	0.302369	0.955214
ENSMUSG00000006204	5430419D17Rik	0.683686	-2.92399	3.97136	-0.736268	0.461568	NA
ENSMUSG00000006205	Htra1	2.00435	-1.31701	3.65768	-0.360066	0.718798	NA
ENSMUSG00000006215	Zbtb17	717.906	0.164059	0.30548	0.537055	0.59123	0.978563
ENSMUSG00000006219	Fblim1	23.7492	0.920091	1.55709	0.590904	0.554585	0.977701
ENSMUSG00000006235	Epor	17104	-0.419555	0.267548	-1.56815	0.116846	0.920788
ENSMUSG00000006262	Mob1b	4073.75	0.181337	0.361638	0.501434	0.616066	0.979733
ENSMUSG00000006273	Atp6v1b2	4045.14	-0.285017	0.267254	-1.06647	0.286213	0.954074
ENSMUSG00000006276	Eps15l1	5172.02	0.0539667	0.339989	0.158731	0.873881	0.996155
ENSMUSG00000006281	Tep1	135.431	0.92577	0.58724	1.57648	0.114916	0.920112
ENSMUSG00000006288	Ttc5	532.352	-0.0689237	0.307399	-0.224216	0.82259	0.991746
ENSMUSG00000006289	Osgep	705.564	-0.152227	0.387547	-0.392796	0.69447	0.984916
ENSMUSG00000006299	Aamp	2279.25	-0.375995	0.263657	-1.42608	0.153846	0.940783
ENSMUSG00000006301	Tmbim1	155.908	0.15604	0.436927	0.357131	0.720994	0.986186
ENSMUSG00000006304	Arpc2	2854.8	-0.0234334	0.319894	-0.0732538	0.941604	0.997825
ENSMUSG00000006307	Kmt2b	4621.55	0.432243	0.442506	0.976807	0.328665	0.961951
ENSMUSG00000006310	Zbtb32	25.399	-0.0137567	0.914003	-0.015051	0.987991	0.999839
ENSMUSG00000006311	Etv2	1.12248	-3.64405	3.94611	-0.923454	0.355771	NA
ENSMUSG00000006313	Upk1a	12.6084	-0.688981	1.39286	-0.494653	0.620845	0.979733
ENSMUSG00000006315	Tmem147	798.966	-0.587009	0.406725	-1.44326	0.148948	0.940783
ENSMUSG00000006333	Rps9	34253.5	-0.264151	0.306373	-0.862186	0.388585	0.966397
ENSMUSG00000006335	Tfpt	508.972	-0.170679	0.315052	-0.541749	0.587992	0.978563
ENSMUSG00000006342	Susd2	1424.82	-0.641276	0.417895	-1.53454	0.124897	0.921023
ENSMUSG00000006344	Ggt5	17.4154	1.25237	0.877629	1.42699	0.153582	0.940783
ENSMUSG00000006345	Ggt1	6.69213	0.0475376	1.94299	0.0244663	0.980481	0.999649
ENSMUSG00000006356	Crip2	2939.37	-1.14212	0.481495	-2.37204	0.0176903	0.579358
ENSMUSG00000006360	Crip1	403.026	-0.425392	0.356866	-1.19202	0.233252	0.950083
ENSMUSG00000006362	Cbfa2t3	1659.54	-0.363261	0.423591	-0.857575	0.391127	0.966397
ENSMUSG00000006373	Pgrmc1	1885.47	-0.23209	0.350209	-0.662719	0.50751	0.974468
ENSMUSG00000006378	Gcat	11.5473	-0.820441	1.81412	-0.452252	0.651087	0.980124
ENSMUSG00000006386	Tek	2.33298	4.67867	3.33057	1.40476	0.160091	NA
ENSMUSG00000006389	Mpl	0.861448	3.17235	3.9628	0.800533	0.423402	NA
ENSMUSG00000006390	Elovl1	2161.49	-0.68538	0.312004	-2.1967	0.0280416	0.658159
ENSMUSG00000006392	Med8	1535.18	-0.652661	0.344406	-1.89503	0.0580879	0.829077
ENSMUSG00000006395	Hyi	67.2824	0.657565	0.707648	0.929226	0.352772	0.963904
ENSMUSG00000006398	Cdc20	9779.04	-0.688674	0.358413	-1.92145	0.0546748	0.82693
ENSMUSG00000006403	Adamts4	5.31125	-0.802229	2.01682	-0.397769	0.6908	0.984615
ENSMUSG00000006411	Nectin4	12.4655	0.0669456	1.78731	0.0374561	0.970121	0.999139
ENSMUSG00000006412	Pfdn2	1191.66	-0.467442	0.336213	-1.39031	0.164433	0.940783
ENSMUSG00000006418	Rnf114	11701.9	0.483278	0.466716	1.03549	0.300442	0.955214
ENSMUSG00000006423	C330007P06Rik	1301.17	-0.1095	0.290198	-0.377328	0.70593	0.985194
ENSMUSG00000006435	Neurl1a	0.336691	1.99666	4.02211	0.496421	0.619597	NA
ENSMUSG00000006442	Srm	1807.88	-0.542982	0.412605	-1.31599	0.188179	0.945896
ENSMUSG00000006445	Epha2	59.0334	1.8864	1.08113	1.74485	0.081011	0.866125
ENSMUSG00000006456	Rbm14	5092.58	-0.175707	0.391976	-0.44826	0.653966	0.980124
ENSMUSG00000006457	Actn3	129.096	0.272482	0.458589	0.594175	0.552395	0.977701
ENSMUSG00000006462	A530013C23Rik	1.36737	-3.92511	3.93917	-0.99643	0.319041	NA
ENSMUSG00000006463	Zdhhc24	1085.94	-0.367802	0.360365	-1.02064	0.307426	0.957285
ENSMUSG00000006464	Bbs1	502.834	-0.427356	0.376712	-1.13444	0.256611	0.952624
ENSMUSG00000006469	Slc34a3	0.847374	-3.23478	3.95893	-0.817084	0.41388	NA
ENSMUSG00000006471	Ndor1	598.512	0.611462	0.387743	1.57698	0.114801	0.920112
ENSMUSG00000006476	Nsmf	97.6254	-0.153895	0.510142	-0.301672	0.762902	0.990929
ENSMUSG00000006494	Pdk1	928.15	0.111754	0.362837	0.308001	0.758082	0.990929
ENSMUSG00000006498	Ptbp1	7774.23	0.275538	0.275907	0.998664	0.317958	0.959332
ENSMUSG00000006517	Mvd	120.84	-0.676886	0.473357	-1.42997	0.152725	0.940783
ENSMUSG00000006519	Cyba	658.499	0.479348	0.60168	0.796683	0.425635	0.969268
ENSMUSG00000006526	Tmem110	108.504	0.138282	0.519542	0.266162	0.790115	0.991416
ENSMUSG00000046138	9930021J03Rik	457.504	0.682741	0.336177	2.0309	0.0422655	0.749925
ENSMUSG00000006538	Ihh	20.9493	-0.0596437	0.994822	-0.0599542	0.952192	0.997955
ENSMUSG00000006546	Cryba2	1.1486	3.60048	3.9486	0.911838	0.361854	NA
ENSMUSG00000006567	Atp7b	1058.71	0.204044	0.338354	0.603048	0.546477	0.977701
ENSMUSG00000006574	Slc4a1	1.59914e+06	0.0699504	0.41403	0.16895	0.865836	0.996155
ENSMUSG00000006575	Rundc3a	3148.65	0.102956	0.49357	0.208594	0.834765	0.993669
ENSMUSG00000006576	Slc4a3	4.28177	0.277736	2.55918	0.108526	0.913579	NA
ENSMUSG00000006585	Cdt1	6494.76	0.441573	0.265232	1.66486	0.0959415	0.889367
ENSMUSG00000068015	Lrch1	673.475	0.683071	0.323332	2.1126	0.0346353	0.708613
ENSMUSG00000006587	Snai3	3.30892	2.56437	2.77579	0.923835	0.355572	NA
ENSMUSG00000006589	Aprt	683.778	-0.587685	0.401801	-1.46263	0.14357	0.940783
ENSMUSG00000006599	Gtf2h1	1415.26	-0.0493745	0.376411	-0.131172	0.895639	0.996237
ENSMUSG00000006611	Hfe	31.0529	0.40886	1.18929	0.343786	0.731008	0.987937
ENSMUSG00000006638	Abhd1	54.1859	-0.769373	0.644098	-1.1945	0.232283	0.950083
ENSMUSG00000006641	Slc5a6	75.2594	0.425556	0.517628	0.822127	0.411005	0.96752
ENSMUSG00000006642	Tcf23	35.2372	-0.0581986	0.888672	-0.0654894	0.947784	0.997858
ENSMUSG00000006649	Nphs1	1118.46	-0.140846	0.444673	-0.31674	0.751441	0.990685
ENSMUSG00000006651	Aplp1	21.034	-1.38847	0.965824	-1.4376	0.150547	0.940783
ENSMUSG00000006673	Qrich1	2313.22	0.0604907	0.271169	0.223074	0.823478	0.992013
ENSMUSG00000006675	P4htm	16.3786	0.582735	1.03234	0.564482	0.572426	0.978563
ENSMUSG00000006676	Usp19	9256.66	0.0741586	0.363146	0.204212	0.838188	0.993683
ENSMUSG00000006678	Pola1	4835.72	0.161911	0.277947	0.582524	0.560214	0.977701
ENSMUSG00000006699	Cdc42	8528.12	-0.188964	0.275922	-0.684847	0.49344	0.974468
ENSMUSG00000006705	Pknox1	1733.04	0.23326	0.302149	0.772005	0.440111	0.970219
ENSMUSG00000006711	D130043K22Rik	8.25265	-0.681957	1.54561	-0.441223	0.659052	0.981322
ENSMUSG00000006715	Gmnn	4927.19	-0.21524	0.360736	-0.596668	0.550729	0.977701
ENSMUSG00000006717	Acot13	524.199	-0.0828941	0.411514	-0.201437	0.840357	0.994229
ENSMUSG00000006720	Zfp184	2.96453	0.412146	2.77132	0.148718	0.881776	NA
ENSMUSG00000006728	Cdk4	2503.19	-0.193498	0.410147	-0.471777	0.637086	0.980116
ENSMUSG00000006731	B4galnt1	1020.09	0.396268	0.468058	0.846621	0.397206	0.967051
ENSMUSG00000006732	Mettl1	277.229	0.0762236	0.402623	0.189318	0.849844	0.995311
ENSMUSG00000006736	Tspan31	294.85	-0.0964452	0.552318	-0.174619	0.861379	0.996155
ENSMUSG00000006740	Kif5b	4677.53	0.191524	0.28633	0.668892	0.503564	0.974468
ENSMUSG00000006763	Saal1	725.273	-0.15563	0.301211	-0.516681	0.605379	0.979733
ENSMUSG00000006777	Krt23	0.683686	-2.92399	3.97136	-0.736268	0.461568	NA
ENSMUSG00000006782	Cnp	445.521	0.33969	0.500116	0.679223	0.496997	0.974468
ENSMUSG00000006784	Ttc25	1.89261	0.839895	3.73922	0.224617	0.822277	NA
ENSMUSG00000006800	Sulf2	35.7661	1.29487	1.05137	1.2316	0.218099	0.948199
ENSMUSG00000006818	Sod2	6508.42	-0.279888	0.290095	-0.964812	0.334639	0.962733
ENSMUSG00000006850	Tmco6	1641.88	-0.39865	0.334466	-1.1919	0.2333	0.950083
ENSMUSG00000006906	Stambp	314.154	-0.736717	0.370637	-1.9877	0.0468445	0.784383
ENSMUSG00000006920	Ezh1	3326.12	-0.157488	0.400123	-0.393599	0.693877	0.984615
ENSMUSG00000006930	Hap1	13.2047	1.24118	1.34333	0.923957	0.355509	0.963904
ENSMUSG00000006931	P3h4	0.677899	-2.91257	3.97187	-0.733298	0.463377	NA
ENSMUSG00000006932	Ctnnb1	4560.57	-0.159126	0.285567	-0.557227	0.577372	0.978563
ENSMUSG00000006941	Eif1b	1093.04	-0.47945	0.377357	-1.27055	0.20389	0.945896
ENSMUSG00000006948	Klk4	2.35684	4.68962	3.90415	1.20119	0.229677	NA
ENSMUSG00000006998	Psmd2	17050.6	-0.294326	0.290919	-1.01171	0.311675	0.957826
ENSMUSG00000007021	Syngr3	0.508424	-2.49707	3.99337	-0.625305	0.531771	NA
ENSMUSG00000007029	Vars	22793.8	0.198364	0.306966	0.64621	0.518143	0.97479
ENSMUSG00000016477	E2f3	824.132	0.686907	0.316416	2.1709	0.0299388	0.673655
ENSMUSG00000007033	Hspa1l	111.304	-0.0268892	0.465831	-0.0577232	0.953969	0.997955
ENSMUSG00000007034	Slc44a4	1.28284	-3.8364	3.94122	-0.973404	0.330353	NA
ENSMUSG00000007035	Msh5	435.73	0.268287	0.308632	0.869277	0.384696	0.966397
ENSMUSG00000007036	Abhd16a	4628.8	-0.143525	0.279879	-0.512811	0.608083	0.979733
ENSMUSG00000007038	Neu1	289.28	0.680848	0.508759	1.33825	0.180815	0.945837
ENSMUSG00000007039	Ddah2	124.825	-0.687557	0.469889	-1.46323	0.143403	0.940783
ENSMUSG00000007041	Clic1	5888.99	-0.51205	0.303153	-1.68908	0.0912043	0.882034
ENSMUSG00000007050	Lsm2	907.474	-0.481184	0.351008	-1.37087	0.170417	0.940783
ENSMUSG00000007080	Pole	3655.4	0.373528	0.310131	1.20442	0.228427	0.950083
ENSMUSG00000007097	Atp1a2	1.53829	-4.09516	3.93558	-1.04055	0.298085	NA
ENSMUSG00000007122	Casq1	13.4561	2.41207	1.34773	1.78973	0.0734969	0.864564
ENSMUSG00000007207	Stx1a	24.7343	0.706616	0.909603	0.77684	0.437253	0.970219
ENSMUSG00000007216	Zfp775	22.5562	-1.31263	1.01638	-1.29148	0.196536	0.945896
ENSMUSG00000007279	Scube2	0.677899	-2.91257	3.97187	-0.733298	0.463377	NA
ENSMUSG00000007338	Mrpl49	2049.19	-0.218335	0.272705	-0.800626	0.423348	0.967828
ENSMUSG00000007379	Dennd2c	7815.71	0.399522	0.412697	0.968076	0.333006	0.962733
ENSMUSG00000007411	Mark3	6201.88	0.140332	0.303317	0.462658	0.643609	0.980124
ENSMUSG00000007415	Gatad1	3031.06	-0.0707197	0.264688	-0.267182	0.789329	0.991317
ENSMUSG00000007458	M6pr	3370.9	-0.195164	0.289051	-0.675189	0.499556	0.974468
ENSMUSG00000035614	Togaram1	747.468	0.689594	0.283762	2.43018	0.0150914	0.557905
ENSMUSG00000007480	Mc5r	3.36903	1.54487	2.76758	0.558203	0.576706	NA
ENSMUSG00000007564	Ppp2r1a	3791.76	0.0927466	0.253135	0.366393	0.714072	0.986186
ENSMUSG00000007570	Fance	381.792	-0.21372	0.354785	-0.602393	0.546912	0.977701
ENSMUSG00000007589	Tinf2	1353.16	-0.185916	0.257937	-0.72078	0.471045	0.973341
ENSMUSG00000007591	Tssk4	13.4858	0.751036	1.02003	0.736286	0.461557	0.973341
ENSMUSG00000007594	Hapln4	0.986218	3.4425	3.95337	0.870775	0.383877	NA
ENSMUSG00000007603	Dus3l	1103.65	-0.0868934	0.265158	-0.327704	0.743135	0.990218
ENSMUSG00000007610	Gtpbp3	389.527	-0.0932069	0.40299	-0.231289	0.817091	0.991746
ENSMUSG00000007613	Tgfbr1	180.254	0.919652	0.491716	1.87029	0.0614433	0.838645
ENSMUSG00000007617	Homer1	532.097	0.555127	0.323977	1.71348	0.0866244	0.875789
ENSMUSG00000007646	Rad51c	1700.12	-0.230888	0.267159	-0.864236	0.387458	0.966397
ENSMUSG00000007655	Cav1	1.53829	-4.09516	3.93558	-1.04055	0.298085	NA
ENSMUSG00000007656	Arpp19	2389.06	-0.544849	0.298932	-1.82265	0.0683564	0.850245
ENSMUSG00000007659	Bcl2l1	33526.2	-0.0567825	0.439104	-0.129314	0.897109	0.996237
ENSMUSG00000007670	Khsrp	13292.9	0.180797	0.283073	0.638696	0.523021	0.97479
ENSMUSG00000007682	Dio2	9.48876	-0.194678	1.23566	-0.15755	0.874811	0.996155
ENSMUSG00000007721	Ccdc124	3210.01	-0.591236	0.279991	-2.11163	0.0347186	0.708613
ENSMUSG00000007739	Cct4	4231.54	-0.13936	0.358809	-0.388396	0.697723	0.985194
ENSMUSG00000007777	0610009B22Rik	255.632	-0.183425	0.460664	-0.398175	0.690501	0.984615
ENSMUSG00000007783	Cpt1c	98.8871	-0.91018	0.665053	-1.36858	0.17113	0.940783
ENSMUSG00000007812	Zfp655	1749.05	0.463625	0.330002	1.40492	0.160046	0.940783
ENSMUSG00000007815	Rhoa	15506.6	-0.452525	0.242651	-1.86492	0.0621929	0.838786
ENSMUSG00000029787	Avl9	737.057	0.696731	0.333422	2.08964	0.0366505	0.727971
ENSMUSG00000007827	Ankrd26	683.829	0.474026	0.308263	1.53773	0.124114	0.921023
ENSMUSG00000007833	Aldh16a1	1418.72	-0.285988	0.280056	-1.02118	0.307169	0.957231
ENSMUSG00000007836	Hnrnpa0	17119.7	0.0328124	0.263552	0.124501	0.900919	0.996237
ENSMUSG00000007837	Prrg2	185.467	-0.0125071	0.42323	-0.0295515	0.976425	0.999649
ENSMUSG00000007850	Hnrnph1	9206.04	-0.3699	0.282035	-1.31154	0.189677	0.945896
ENSMUSG00000007867	Ift43	1.88406	4.37068	3.58955	1.21761	0.223372	NA
ENSMUSG00000007872	Id3	47.9959	0.987915	0.917804	1.07639	0.281753	0.954074
ENSMUSG00000007877	Tcap	1.2507	-0.787056	3.88425	-0.202627	0.839426	NA
ENSMUSG00000007880	Arid1a	5904.53	0.517972	0.393875	1.31507	0.188487	0.945896
ENSMUSG00000007888	Crlf1	83.4102	-1.3972	0.912854	-1.53059	0.125872	0.921519
ENSMUSG00000007891	Ctsd	16183.8	-0.165245	0.249899	-0.661247	0.508454	0.974468
ENSMUSG00000007892	Rplp1	49339.2	-0.548458	0.346426	-1.58319	0.113378	0.917732
ENSMUSG00000007946	Phox2a	2.29719	4.62049	3.92753	1.17644	0.239421	NA
ENSMUSG00000007950	Abhd8	767.271	-0.372001	0.35465	-1.04893	0.294212	0.954995
ENSMUSG00000007987	Ift22	74.2566	0.155562	0.629548	0.247101	0.80483	0.991746
ENSMUSG00000007989	Fzd3	0.683686	-2.92399	3.97136	-0.736268	0.461568	NA
ENSMUSG00000008028	1700008O03Rik	1.34676	3.8903	3.94107	0.987117	0.323585	NA
ENSMUSG00000008035	Mid1ip1	1853.35	-0.531081	0.277916	-1.91094	0.0560124	0.82693
ENSMUSG00000008036	Ap2s1	3098.86	-0.305631	0.277567	-1.10111	0.270851	0.953915
ENSMUSG00000008090	Fgfrl1	1301.1	-0.616232	0.297032	-2.07463	0.0380205	0.727971
ENSMUSG00000008129	4930432K21Rik	6.62732	-0.942949	1.61572	-0.583609	0.559483	0.977701
ENSMUSG00000008136	Fhl2	0.402973	2.17921	4.01481	0.542793	0.587272	NA
ENSMUSG00000008140	Emc10	6730.01	-0.202476	0.26836	-0.754492	0.450554	0.970631
ENSMUSG00000008153	Clstn3	32.6135	-0.213587	1.09255	-0.195494	0.845006	0.994229
ENSMUSG00000008167	Fbxw9	101.595	0.0821866	0.52795	0.155671	0.876292	0.996155
ENSMUSG00000008193	Spib	676.271	0.427502	1.19071	0.359031	0.719572	0.986186
ENSMUSG00000008200	Fnbp4	4090.72	0.542949	0.282368	1.92284	0.0545003	0.82693
ENSMUSG00000008206	Cers4	95.4003	0.794621	0.719942	1.10373	0.269711	0.953915
ENSMUSG00000008226	Scrn3	4793.69	-0.216548	0.267645	-0.80909	0.418463	0.96752
ENSMUSG00000008301	Phax	459.473	-0.716177	0.408616	-1.75269	0.0796556	0.866125
ENSMUSG00000008305	Tle1	215.822	0.148437	0.428001	0.346814	0.728731	0.987504
ENSMUSG00000007476	Lrrc8a	677.125	0.699747	0.337269	2.07474	0.0380104	0.727971
ENSMUSG00000008318	Relt	7609.05	-0.143879	0.299349	-0.480639	0.630773	0.979733
ENSMUSG00000008333	Snrpb2	863.907	-0.348708	0.49438	-0.705344	0.480596	0.974468
ENSMUSG00000008348	Ubc	38743	0.0477723	0.252587	0.189132	0.849989	0.995311
ENSMUSG00000008373	Prpf31	2391.94	-0.435708	0.306036	-1.42372	0.154529	0.940783
ENSMUSG00000008384	Sertad1	2668.73	-0.132473	0.364139	-0.363798	0.716009	0.986186
ENSMUSG00000008393	Carhsp1	57958.1	-0.0585253	0.340833	-0.171712	0.863664	0.996155
ENSMUSG00000008398	Elk3	117.851	0.477152	0.773608	0.616788	0.537375	0.977346
ENSMUSG00000008429	Herpud2	3393.49	0.0977455	0.306269	0.319149	0.749613	0.99034
ENSMUSG00000008435	Rdh13	177.256	0.153581	0.429691	0.357423	0.720775	0.986186
ENSMUSG00000008438	Adam21	1.1486	3.60048	3.9486	0.911838	0.361854	NA
ENSMUSG00000008450	Nutf2	1935.59	-0.302408	0.355164	-0.85146	0.394514	0.966777
ENSMUSG00000008461	Fut1	2.08879	-0.649926	3.61798	-0.179638	0.857437	NA
ENSMUSG00000008475	Arpc5	3984.53	-0.453459	0.265697	-1.70668	0.0878824	0.876365
ENSMUSG00000008482	Rnf151	2.0337	-4.49849	3.92857	-1.14507	0.25218	NA
ENSMUSG00000008496	Pou2f2	501.493	0.26972	0.644893	0.41824	0.675772	0.983708
ENSMUSG00000008540	Mgst1	45.2946	0.554883	0.805011	0.689287	0.490643	0.974468
ENSMUSG00000008575	Nfib	2.44489	0.890838	2.99361	0.297579	0.766024	NA
ENSMUSG00000008590	Htr3b	1.3558	-3.91328	3.93944	-0.99336	0.320534	NA
ENSMUSG00000008601	Rab25	0.481065	-2.42459	3.99778	-0.606485	0.544192	NA
ENSMUSG00000008604	Ubqln4	1316.18	0.032699	0.312224	0.10473	0.91659	0.997004
ENSMUSG00000008668	Rps18	16307.3	-0.331995	0.405959	-0.817806	0.413468	0.96752
ENSMUSG00000008682	Rpl10	9619.53	-0.385656	0.284075	-1.35759	0.174595	0.944283
ENSMUSG00000008683	Rps15a	13007.3	-0.393393	0.353018	-1.11437	0.26512	0.95347
ENSMUSG00000008690	Ncaph2	16985.4	-0.0871462	0.266731	-0.32672	0.74388	0.990218
ENSMUSG00000008730	Hipk1	73721.8	0.0725743	0.442492	0.164013	0.869721	0.996155
ENSMUSG00000008734	Gprc5b	2.18068	-0.484379	3.55882	-0.136107	0.891737	NA
ENSMUSG00000008763	Man1a2	1580.41	0.426949	0.276362	1.54489	0.122373	0.921023
ENSMUSG00000008822	Acyp1	573.792	-0.762225	0.413724	-1.84235	0.0654234	0.839886
ENSMUSG00000008843	Cldn13	29944.2	-0.680215	0.277128	-2.45452	0.0141075	0.543238
ENSMUSG00000008845	Cd163	22.7696	0.923678	1.22488	0.754098	0.45079	0.970631
ENSMUSG00000008855	Hdac5	1366.11	0.198403	0.344205	0.576408	0.56434	0.977701
ENSMUSG00000008859	Rala	184.711	-0.0545317	0.429372	-0.127003	0.898938	0.996237
ENSMUSG00000008892	Vdac3	6732.22	-0.443038	0.283211	-1.56434	0.117738	0.921023
ENSMUSG00000008958	Vps72	988.032	-0.44843	0.312382	-1.43552	0.15114	0.940783
ENSMUSG00000008976	Gabpa	2194.82	-0.0691631	0.25935	-0.266679	0.789716	0.991361
ENSMUSG00000008999	Bmp7	0.897842	3.31437	3.95763	0.837464	0.402332	NA
ENSMUSG00000009013	Dynll1	8563.47	-0.809139	0.293643	-2.75552	0.0058599	0.407516
ENSMUSG00000009030	Pdcl	878.299	-0.0312286	0.343939	-0.0907967	0.927654	0.997292
ENSMUSG00000009035	Tmem184b	133.385	-0.129917	0.5679	-0.228767	0.81905	0.991746
ENSMUSG00000009073	Nf2	1558.97	-0.0322239	0.284452	-0.113284	0.909805	0.996237
ENSMUSG00000009075	Cabp7	3.3724	-1.06703	2.68196	-0.397855	0.690737	NA
ENSMUSG00000009076	Zmat5	212.598	-0.316034	0.40629	-0.777854	0.436655	0.970219
ENSMUSG00000009079	Ewsr1	17052.3	-0.0307596	0.262363	-0.117241	0.906669	0.996237
ENSMUSG00000009090	Ap1b1	8235.1	-0.016467	0.30598	-0.0538173	0.957081	0.99831
ENSMUSG00000009092	Derl3	44.3936	-0.570008	0.745886	-0.764203	0.444746	0.970219
ENSMUSG00000009108	Gnat2	145.857	0.795944	0.772416	1.03046	0.302794	0.955214
ENSMUSG00000009112	Bcl2l13	10324.6	0.0806969	0.287115	0.281061	0.778664	0.990929
ENSMUSG00000009115	Spatc1l	0.448921	2.33857	4.00532	0.583866	0.55931	NA
ENSMUSG00000009145	Dqx1	399.195	-0.096217	0.355562	-0.270605	0.786694	0.991275
ENSMUSG00000009185	Ccl8	0.537297	2.57441	3.99083	0.64508	0.518876	NA
ENSMUSG00000009207	Lnpk	2299.11	0.183028	0.297695	0.614817	0.538676	0.977455
ENSMUSG00000009210	Prr29	0.739664	3.03386	3.96833	0.764517	0.444559	NA
ENSMUSG00000009246	Trpm5	16.8319	0.0354708	0.914306	0.0387953	0.969054	0.999139
ENSMUSG00000009281	Rarres2	3.73294	5.32421	3.41602	1.5586	0.119091	NA
ENSMUSG00000009291	Pttg1ip	2488.23	-0.315152	0.276917	-1.13807	0.255089	0.952624
ENSMUSG00000009292	Trpm2	45.5262	1.29443	0.858572	1.50765	0.131644	0.933456
ENSMUSG00000009293	Ube2g2	1526.45	-0.355601	0.46379	-0.766729	0.443243	0.970219
ENSMUSG00000009350	Mpo	651.361	-1.97585	1.35772	-1.45526	0.145596	0.940783
ENSMUSG00000009376	Met	1.32511	-3.88139	3.94017	-0.985082	0.324584	NA
ENSMUSG00000009394	Syn2	0.537297	2.57441	3.99083	0.64508	0.518876	NA
ENSMUSG00000009406	Elk1	122.419	-0.052593	0.481928	-0.10913	0.913099	0.996739
ENSMUSG00000009418	Nav1	24.5391	1.52856	1.29275	1.18241	0.237042	0.950383
ENSMUSG00000009470	Tnpo1	6333.58	0.384016	0.34371	1.11727	0.263881	0.95347
ENSMUSG00000009487	Otog	1.3558	-3.91328	3.93944	-0.99336	0.320534	NA
ENSMUSG00000009535	Rnmt	3199.25	-0.152326	0.272403	-0.559195	0.576029	0.978563
ENSMUSG00000009549	Srp14	2860.25	-0.685566	0.386032	-1.77593	0.0757442	0.866083
ENSMUSG00000009551	6330409D20Rik	0.561151	2.65129	3.98657	0.665056	0.506015	NA
ENSMUSG00000009555	Cdk9	1577.36	-0.35089	0.295574	-1.18715	0.235169	0.950083
ENSMUSG00000009563	Tor2a	239.016	-0.803419	0.470467	-1.7077	0.0876911	0.876365
ENSMUSG00000009566	Fpgs	586.233	-0.463343	0.393335	-1.17798	0.238803	0.950628
ENSMUSG00000009569	Mkl2	91.0248	0.267329	0.457228	0.584674	0.558767	0.977701
ENSMUSG00000009575	Cbx5	15235	0.0841939	0.305254	0.275816	0.78269	0.990929
ENSMUSG00000009580	Odam	0.268649	1.73003	4.03442	0.428818	0.668056	NA
ENSMUSG00000028282	Casp8ap2	2108.77	0.703976	0.282419	2.49266	0.0126788	0.521386
ENSMUSG00000009596	Taf7l	0.64142	-2.83839	3.97528	-0.71401	0.475221	NA
ENSMUSG00000009614	Sardh	1.19645	-3.7323	3.94378	-0.946375	0.343957	NA
ENSMUSG00000009621	Vav2	281.141	0.809367	0.583578	1.3869	0.165471	0.940783
ENSMUSG00000009628	Tex15	8.25474	0.964054	1.91219	0.504161	0.614148	0.979733
ENSMUSG00000009630	Ppp2cb	1672.4	-0.221784	0.275171	-0.805987	0.42025	0.96752
ENSMUSG00000009633	G0s2	20.538	-0.0410366	1.35348	-0.0303194	0.975812	0.999591
ENSMUSG00000009640	Dmap1	526.122	-0.392052	0.326202	-1.20187	0.229416	0.950083
ENSMUSG00000009647	Mcu	407.347	0.0319574	0.302249	0.105732	0.915795	0.996989
ENSMUSG00000009654	Oit3	0.801774	-3.15954	3.9617	-0.797521	0.425148	NA
ENSMUSG00000009670	Tex11	1.45899	4.00435	3.93849	1.01672	0.309286	NA
ENSMUSG00000009681	Bcr	102.528	0.896561	0.752618	1.19126	0.233553	0.950083
ENSMUSG00000009687	Fxyd5	147.8	-0.0673927	0.691839	-0.097411	0.9224	0.997261
ENSMUSG00000009731	Kcnd1	289.426	0.44025	0.476328	0.924258	0.355352	0.963904
ENSMUSG00000009733	Tfcp2	808.376	0.0422304	0.306881	0.137611	0.890548	0.996237
ENSMUSG00000009734	Pou6f2	0.94027	3.37029	3.95572	0.852004	0.394212	NA
ENSMUSG00000009739	Pou6f1	123.632	1.11898	0.760272	1.47182	0.141071	0.940783
ENSMUSG00000009741	Ubp1	7984.86	-0.165801	0.312011	-0.531393	0.595146	0.978563
ENSMUSG00000009772	Nuak2	112.279	0.469217	0.623924	0.752042	0.452026	0.970631
ENSMUSG00000009828	Ick	215.463	0.381871	0.381259	1.00161	0.316534	0.959332
ENSMUSG00000009863	Sdhb	2401.82	-0.427703	0.307118	-1.39263	0.163731	0.940783
ENSMUSG00000009876	Cox4i2	3.19702	3.14998	2.77018	1.1371	0.255495	NA
ENSMUSG00000009894	Snap47	122.632	-0.844822	0.530705	-1.59189	0.11141	0.914386
ENSMUSG00000009900	Wnt3a	16.3019	-1.16114	1.15182	-1.00809	0.313411	0.958415
ENSMUSG00000009905	Kdsr	133.189	0.651245	0.39432	1.65156	0.0986234	0.895747
ENSMUSG00000009907	Vps4b	1164.22	0.0711302	0.267053	0.266352	0.789968	0.991361
ENSMUSG00000009927	Rps25	7923.09	-0.642114	0.394226	-1.6288	0.103356	0.903228
ENSMUSG00000009941	Nxf2	2.26313	-1.53194	3.01668	-0.507824	0.611576	NA
ENSMUSG00000009995	Taz	408.414	-0.478438	0.387229	-1.23554	0.216628	0.948069
ENSMUSG00000010021	Kif19a	7.75659	0.18867	1.53648	0.122793	0.902271	0.996237
ENSMUSG00000010025	Aldh3a2	134.487	0.770217	0.447277	1.72202	0.0850666	0.874381
ENSMUSG00000010044	Zmynd10	1.31304	0.0867079	3.86653	0.0224253	0.982109	NA
ENSMUSG00000010045	Tmem115	384.592	-0.293114	0.351474	-0.833955	0.404306	0.96752
ENSMUSG00000010047	Hyal2	325.191	-1.10444	0.344237	-3.20836	0.00133493	0.197886
ENSMUSG00000010048	Ifrd2	27222.5	-0.306703	0.294081	-1.04292	0.296985	0.955214
ENSMUSG00000010051	Hyal1	122.95	0.330198	0.57279	0.576473	0.564296	0.977701
ENSMUSG00000010054	Tusc2	1022.98	-0.347254	0.273928	-1.26768	0.204911	0.945896
ENSMUSG00000010057	Nprl2	112.256	-0.673209	0.469285	-1.43454	0.151418	0.940783
ENSMUSG00000010066	Cacna2d2	2.1949	0.38025	3.04588	0.124841	0.90065	NA
ENSMUSG00000010067	Rassf1	1017.52	-0.186792	0.294139	-0.635047	0.525398	0.97479
ENSMUSG00000010095	Slc3a2	24617.7	-0.0602326	0.333681	-0.180509	0.856753	0.995802
ENSMUSG00000010097	Nxf1	5831.28	-0.0586572	0.248279	-0.236255	0.813235	0.991746
ENSMUSG00000010110	Stx5a	3063.3	-0.197602	0.312428	-0.632471	0.527079	0.974961
ENSMUSG00000010142	Tnfrsf13b	165.419	0.0788177	0.673157	0.117087	0.906791	0.996237
ENSMUSG00000010154	Spire2	476.007	-0.697305	0.57115	-1.22088	0.222131	0.949699
ENSMUSG00000010205	Raver1	3944.03	-0.119852	0.362546	-0.330583	0.74096	0.989684
ENSMUSG00000010277	2610507B11Rik	8168.04	0.0406312	0.31122	0.130554	0.896128	0.996237
ENSMUSG00000010290	AI597479	294.133	-0.14485	0.357738	-0.404906	0.685546	0.984615
ENSMUSG00000010307	Tmem86a	70.4778	1.19974	0.889624	1.3486	0.177467	0.944283
ENSMUSG00000010311	Optc	0.64142	-2.83839	3.97528	-0.71401	0.475221	NA
ENSMUSG00000010342	Tex14	13.3454	-1.0224	1.12125	-0.911838	0.361854	0.963904
ENSMUSG00000010358	Ifi35	3387.38	-0.525541	0.298081	-1.76308	0.0778865	0.866125
ENSMUSG00000010362	Rdm1	527.903	0.46805	0.523631	0.893855	0.371399	0.963904
ENSMUSG00000010376	Nedd8	2673.16	-0.205154	0.314814	-0.651667	0.514616	0.974468
ENSMUSG00000010392	Gosr1	1080.57	-0.0279122	0.292198	-0.095525	0.923898	0.997261
ENSMUSG00000010406	Mrpl52	842.933	-0.639435	0.433399	-1.47539	0.140107	0.940783
ENSMUSG00000010453	Kansl3	2094.14	0.305445	0.283284	1.07823	0.280931	0.954074
ENSMUSG00000010461	Eya4	6.47455	3.17652	1.82177	1.74364	0.0812215	0.866125
ENSMUSG00000010492	Uckl1os	18.4569	1.15565	0.958446	1.20576	0.22791	0.950083
ENSMUSG00000010517	Faf1	4012.48	-0.217896	0.284549	-0.765757	0.443821	0.970219
ENSMUSG00000010529	Gm266	4.01387	1.90612	2.50678	0.760386	0.447024	NA
ENSMUSG00000010538	Tsacc	12.2532	-1.16671	1.05994	-1.10073	0.271012	0.953915
ENSMUSG00000010554	Mettl16	863.419	-0.724255	0.470609	-1.53897	0.123811	0.921023
ENSMUSG00000010592	Dazl	0.574299	2.56166	3.99156	0.641769	0.521023	NA
ENSMUSG00000010607	Pigyl	297.677	-0.496523	0.536829	-0.924919	0.355008	0.963904
ENSMUSG00000010608	Rbm25	4957.74	0.345436	0.314534	1.09825	0.272097	0.953915
ENSMUSG00000010609	Psen2	399.084	0.00527009	0.391314	0.0134677	0.989255	0.999839
ENSMUSG00000010651	Acaa1b	7.04334	-1.16879	2.20591	-0.529844	0.59622	0.978563
ENSMUSG00000010660	Plcd1	0.671622	2.89118	3.9746	0.727414	0.466972	NA
ENSMUSG00000010663	Fads1	2715.8	0.184981	0.285581	0.647736	0.517156	0.97479
ENSMUSG00000010721	Lmbr1	34.8798	0.227555	0.809543	0.281091	0.778641	0.990929
ENSMUSG00000010751	Tnfrsf22	13.7756	-0.403711	0.955224	-0.422635	0.672562	0.983612
ENSMUSG00000010755	Cars	5703.37	-0.194235	0.264666	-0.733887	0.463018	0.973341
ENSMUSG00000010760	Phlda2	36.5058	-0.830508	0.791734	-1.04897	0.29419	0.954995
ENSMUSG00000010796	Asz1	0.854608	-3.24636	3.95851	-0.820095	0.412162	NA
ENSMUSG00000010830	Kdelr3	13.0116	0.213577	1.37533	0.155292	0.876591	0.996155
ENSMUSG00000010911	Apip	1098.84	-0.498315	0.365139	-1.36473	0.172339	0.940783
ENSMUSG00000010914	Pdhx	1152.09	-0.210506	0.283997	-0.741228	0.458555	0.973157
ENSMUSG00000010936	Vac14	1443.28	0.0982274	0.277597	0.353849	0.723452	0.986574
ENSMUSG00000011008	Mcoln2	25.976	-0.104372	1.18325	-0.0882072	0.929712	0.997473
ENSMUSG00000011034	Slc5a1	0.448921	2.33857	4.00532	0.583866	0.55931	NA
ENSMUSG00000011096	Akt1s1	2000.28	0.370084	0.378399	0.978025	0.328062	0.961951
ENSMUSG00000011114	Tbrg1	1851.02	-0.38194	0.295384	-1.29303	0.196001	0.945896
ENSMUSG00000011148	Adssl1	63.4745	-0.383699	0.909307	-0.421969	0.673048	0.983612
ENSMUSG00000011158	Brf1	3474.67	0.160257	0.261199	0.613544	0.539517	0.977455
ENSMUSG00000011179	Odc1	70499.7	-0.438461	0.29232	-1.49993	0.133631	0.933456
ENSMUSG00000011254	Thg1l	308.273	-0.217443	0.518637	-0.419258	0.675028	0.983708
ENSMUSG00000011256	Adam19	534.452	0.882043	0.472498	1.86677	0.0619344	0.838645
ENSMUSG00000011257	Pabpc4	43705.8	-0.159158	0.27502	-0.578713	0.562783	0.977701
ENSMUSG00000011263	Exoc3l2	1.31037	3.81533	3.94288	0.96765	0.333219	NA
ENSMUSG00000011267	Zfp296	66.0029	-0.0839968	0.783022	-0.107273	0.914573	0.996918
ENSMUSG00000011306	Sugp1	2359.71	-0.0957574	0.278995	-0.343223	0.731431	0.988045
ENSMUSG00000011349	Dmrtc2	0.854608	-3.24636	3.95851	-0.820095	0.412162	NA
ENSMUSG00000011350	Gm5893	1.25487	3.78507	3.94363	0.959792	0.33716	NA
ENSMUSG00000011382	Dhdh	190.135	0.124113	0.730025	0.170013	0.865	0.996155
ENSMUSG00000011427	Zfp790	104.767	0.0400859	0.447063	0.089665	0.928553	0.997403
ENSMUSG00000011632	Pinlyp	1.36293	-0.47433	3.86492	-0.122727	0.902323	NA
ENSMUSG00000028850	Gpatch3	532.468	0.715874	0.322577	2.21924	0.0264707	0.645568
ENSMUSG00000011751	Sptbn4	86.999	1.01169	0.669564	1.51097	0.130796	0.933456
ENSMUSG00000011752	Pgam1	1626.45	-0.73606	0.401513	-1.83321	0.0667709	0.842845
ENSMUSG00000011831	Evi5	9236.74	0.599091	0.372865	1.60672	0.108115	0.90408
ENSMUSG00000011832	Evi5l	114.166	0.560372	0.647928	0.864867	0.387112	0.966397
ENSMUSG00000011837	Snapc2	314.034	0.0310648	0.553545	0.0561198	0.955246	0.997955
ENSMUSG00000011877	Git1	1831.14	0.315688	0.384468	0.821104	0.411587	0.96752
ENSMUSG00000011884	Gltp	4650.37	-0.173359	0.361661	-0.47934	0.631697	0.979733
ENSMUSG00000011958	Bnip2	2272.97	-0.200379	0.273288	-0.733217	0.463426	0.973341
ENSMUSG00000011960	Ccnt1	3751.57	0.260743	0.272837	0.955673	0.339238	0.963675
ENSMUSG00000012042	4930579F01Rik	1.07459	3.56086	3.94975	0.901542	0.3673	NA
ENSMUSG00000012076	Brms1l	992.346	-0.155985	0.298653	-0.522295	0.601465	0.978563
ENSMUSG00000012114	Med15	3774.35	0.273937	0.367158	0.746103	0.455605	0.97164
ENSMUSG00000012117	Dhdds	1338.63	-0.507924	0.295134	-1.721	0.0852516	0.874381
ENSMUSG00000012123	Crybg2	7.15066	0.473087	1.87965	0.251689	0.801282	0.991746
ENSMUSG00000012126	Ubxn11	25.5418	0.0668656	1.03756	0.0644449	0.948616	0.997858
ENSMUSG00000012282	Wnt8a	1.71601	0.756392	3.84097	0.196927	0.843885	NA
ENSMUSG00000012296	Tjap1	1629.66	-0.00315075	0.337796	-0.00932738	0.992558	0.999839
ENSMUSG00000012350	Ehf	3.06278	1.92788	2.70638	0.712345	0.476251	NA
ENSMUSG00000012405	Rpl15	12518.6	-0.39017	0.357689	-1.09081	0.275358	0.953915
ENSMUSG00000012422	Tmem167	1520.34	-0.34932	0.324423	-1.07674	0.281596	0.954074
ENSMUSG00000012428	Steap4	1.13261	-0.551497	3.89411	-0.141623	0.887378	NA
ENSMUSG00000012429	Mplkip	762.686	-0.652779	0.340484	-1.91721	0.0552116	0.82693
ENSMUSG00000012443	Kif11	10667.4	0.209022	0.296792	0.704269	0.481265	0.974468
ENSMUSG00000012483	Rpa3	1514.7	-0.203688	0.42121	-0.483577	0.628686	0.979733
ENSMUSG00000019841	Rev3l	2404.13	0.716706	0.326851	2.19276	0.0283246	0.660218
ENSMUSG00000012535	Tnpo3	2383.59	-0.0766261	0.270336	-0.283448	0.776834	0.990929
ENSMUSG00000012609	Ttll5	961.274	0.110991	0.307367	0.361101	0.718024	0.986186
ENSMUSG00000012640	Zfp715	162.821	0.406571	0.398328	1.02069	0.3074	0.957285
ENSMUSG00000012705	Retn	0.801774	-3.15954	3.9617	-0.797521	0.425148	NA
ENSMUSG00000012777	Acp4	2.51516	-1.05785	3.41477	-0.309785	0.756724	NA
ENSMUSG00000012819	Cdh23	6.28852	-1.67633	1.55456	-1.07833	0.280887	0.954074
ENSMUSG00000012848	Rps5	21797.1	-0.367063	0.361402	-1.01566	0.309789	0.957826
ENSMUSG00000012889	Podnl1	10.6451	1.30366	1.71672	0.759394	0.447617	0.970277
ENSMUSG00000013033	Adgrl1	93.6928	0.579805	0.524158	1.10617	0.268655	0.953915
ENSMUSG00000013076	Amotl1	1.30693	1.63666	3.64911	0.44851	0.653785	NA
ENSMUSG00000013083	2200002J24Rik	0.64142	-2.83839	3.97528	-0.71401	0.475221	NA
ENSMUSG00000013089	Etv5	108.749	0.99575	0.508672	1.95755	0.0502832	0.802395
ENSMUSG00000013091	Tmem190	7.72972	0.11201	1.29576	0.0864436	0.931114	0.997825
ENSMUSG00000013150	Gfod2	133.583	-0.57622	0.437417	-1.31732	0.18773	0.945896
ENSMUSG00000013155	Enkd1	427.558	-0.127424	0.378971	-0.336237	0.736692	0.98884
ENSMUSG00000013158	4933405L10Rik	0.854608	-3.24636	3.95851	-0.820095	0.412162	NA
ENSMUSG00000013160	Atp6v0d1	6923.56	-0.295459	0.295763	-0.99897	0.317809	0.959332
ENSMUSG00000013236	Ptprs	84.4333	0.235371	0.658745	0.357303	0.720865	0.986186
ENSMUSG00000013275	Slc41a1	90.7807	0.573943	0.63465	0.904345	0.365812	0.963904
ENSMUSG00000013338	Fer1l4	8.38592	-0.0553454	1.50341	-0.0368132	0.970634	0.999139
ENSMUSG00000013415	Igf2bp1	1.49044	1.7125	3.90169	0.438911	0.660726	NA
ENSMUSG00000013418	B4galnt2	36.27	0.190113	0.682049	0.278739	0.780445	0.990929
ENSMUSG00000013419	Zfp651	26.2281	1.56037	0.914919	1.70547	0.0881059	0.876365
ENSMUSG00000013465	Nelfb	1283.57	-0.158927	0.328147	-0.484316	0.628162	0.979733
ENSMUSG00000013483	Card14	2.11073	0.208068	3.64482	0.057086	0.954477	NA
ENSMUSG00000013495	Tmem175	220.066	0.070603	0.533295	0.13239	0.894676	0.996237
ENSMUSG00000013539	Tango2	801.505	-0.271251	0.395758	-0.685394	0.493095	0.974468
ENSMUSG00000013562	4833413E03Rik	1.7229	4.19874	3.93452	1.06715	0.285902	NA
ENSMUSG00000013584	Aldh1a2	15.3247	1.0568	0.981641	1.07656	0.281676	0.954074
ENSMUSG00000013593	Ndufs2	3767.31	-0.276929	0.314787	-0.879733	0.379004	0.966397
ENSMUSG00000013611	Snx31	8.24929	0.00937416	1.78052	0.00526485	0.995799	0.999891
ENSMUSG00000013622	Atraid	218.528	-0.0569378	0.379618	-0.149987	0.880775	0.996155
ENSMUSG00000013629	Cad	3028.97	0.10462	0.324099	0.322802	0.746845	0.99034
ENSMUSG00000013646	Sh3bp5l	1994.83	-0.2259	0.443869	-0.508933	0.610799	0.979733
ENSMUSG00000013662	Atad1	836.034	0.0195233	0.325296	0.0600169	0.952142	0.997955
ENSMUSG00000013663	Pten	2084.42	0.204343	0.312064	0.654809	0.512591	0.974468
ENSMUSG00000005893	Nr2c2	2634.52	0.719692	0.364893	1.97234	0.0485712	0.796633
ENSMUSG00000013701	Timm23	2229.66	-0.570445	0.395255	-1.44323	0.148955	0.940783
ENSMUSG00000013707	Tnfaip8l2	74.29	0.427628	0.573304	0.745901	0.455727	0.971736
ENSMUSG00000013736	Trnt1	1047	-0.43404	0.325034	-1.33537	0.181756	0.945896
ENSMUSG00000013787	Ehmt2	1038.3	0.183402	0.363081	0.505128	0.613469	0.979733
ENSMUSG00000013822	Elof1	1881.15	-0.521126	0.33883	-1.53801	0.124045	0.921023
ENSMUSG00000013833	Med16	2413.59	-0.0418676	0.28619	-0.146293	0.88369	0.996155
ENSMUSG00000013846	St3gal1	9003.07	0.40752	0.368414	1.10615	0.268663	0.953915
ENSMUSG00000013858	Tmem259	8515.21	-0.168858	0.257511	-0.655733	0.511996	0.974468
ENSMUSG00000013878	Rnf170	84.9118	0.378703	0.662839	0.571334	0.567773	0.977701
ENSMUSG00000013921	Clip3	1.07459	3.56086	3.94975	0.901542	0.3673	NA
ENSMUSG00000013928	Thap8	5.11616	0.613821	2.02604	0.302966	0.761916	0.990929
ENSMUSG00000013973	Dedd	745.604	-0.496456	0.312012	-1.59115	0.111577	0.915308
ENSMUSG00000013974	Mcemp1	23.364	-0.064872	1.36207	-0.0476274	0.962013	0.998543
ENSMUSG00000013997	Nit1	566.673	-0.045571	0.29395	-0.15503	0.876798	0.996155
ENSMUSG00000014030	Pax5	1344.02	0.964166	1.03701	0.929753	0.352499	0.963904
ENSMUSG00000014039	Prdm15	211.943	-0.0380038	0.426291	-0.0891497	0.928963	0.997403
ENSMUSG00000014074	Rnf168	2588.19	0.278779	0.289274	0.96372	0.335187	0.962733
ENSMUSG00000014075	Tctex1d2	84.1774	-0.520947	0.650367	-0.801005	0.423129	0.967819
ENSMUSG00000014077	Chp1	7489.03	-0.201191	0.364984	-0.551231	0.581475	0.978563
ENSMUSG00000014158	Trpv4	39.4718	0.778292	0.713011	1.09156	0.275028	0.953915
ENSMUSG00000014164	Klhl3	3.55765	2.19529	2.60604	0.842385	0.399573	NA
ENSMUSG00000014177	Tvp23b	199.95	-0.233248	0.45441	-0.513299	0.607742	0.979733
ENSMUSG00000014195	Dnajc7	2284.6	-0.406531	0.307046	-1.32401	0.1855	0.945896
ENSMUSG00000014198	Zfp385c	0.537297	2.57441	3.99083	0.64508	0.518876	NA
ENSMUSG00000014226	Cacybp	2318.32	-0.495448	0.410265	-1.20763	0.227189	0.950083
ENSMUSG00000014232	Cluap1	231.228	-0.159096	0.493922	-0.322108	0.747371	0.99034
ENSMUSG00000014243	Zswim7	205.851	-0.473963	0.416185	-1.13883	0.254774	0.952624
ENSMUSG00000014245	Pigl	180.685	0.129637	0.38618	0.335692	0.737103	0.98884
ENSMUSG00000014294	Ndufa2	4164.95	-0.351097	0.2753	-1.27533	0.202193	0.945896
ENSMUSG00000014301	Pam16	556.613	-0.101506	0.331147	-0.306528	0.759203	0.990929
ENSMUSG00000014303	Glis2	4.58993	-1.22339	2.49321	-0.49069	0.623646	NA
ENSMUSG00000014313	Cox6c	5492.24	-0.164548	0.326398	-0.504135	0.614167	0.979733
ENSMUSG00000014329	Bicc1	0.537297	2.57441	3.99083	0.64508	0.518876	NA
ENSMUSG00000014349	Ube2z	4368.7	0.041168	0.26778	0.153738	0.877816	0.996155
ENSMUSG00000014353	Tmem87b	202.768	0.204362	0.456127	0.448038	0.654126	0.980124
ENSMUSG00000014355	Anapc1	5711.88	0.152996	0.310644	0.492512	0.622357	0.979733
ENSMUSG00000014361	Mertk	61.4093	1.76038	2.03318	0.865825	0.386586	0.966397
ENSMUSG00000014402	Tsg101	2422.74	-0.369168	0.25369	-1.4552	0.145615	0.940783
ENSMUSG00000014418	Hps5	297.596	0.0688939	0.464401	0.14835	0.882067	0.996155
ENSMUSG00000014426	Map3k4	328.174	0.0172658	0.381363	0.0452739	0.963889	0.998543
ENSMUSG00000014444	Piezo1	8261.18	0.218455	0.382818	0.57065	0.568237	0.977723
ENSMUSG00000014453	Blk	469.047	0.765125	1.38592	0.552069	0.580901	0.978563
ENSMUSG00000014470	Rnf166	547.48	-0.0610163	0.327373	-0.186382	0.852146	0.995311
ENSMUSG00000014496	Ankrd28	2698.87	0.62546	0.396558	1.57722	0.114745	0.920112
ENSMUSG00000014498	Ankrd52	2882.37	0.386173	0.342792	1.12655	0.259933	0.952972
ENSMUSG00000014503	Pkd2l2	823.97	-0.112192	0.314567	-0.356655	0.72135	0.986186
ENSMUSG00000014504	Srp19	1499.11	-0.372596	0.379336	-0.982234	0.325985	0.961013
ENSMUSG00000014529	Tmbim7	1.15117	-2.51406	3.94712	-0.636936	0.524166	NA
ENSMUSG00000014543	Klra17	4.61562	-2.75878	2.43805	-1.13155	0.257822	NA
ENSMUSG00000014547	Wdfy2	149.109	1.00521	0.661421	1.51977	0.128569	0.931286
ENSMUSG00000014550	Rbsn	1312.91	0.0643196	0.291917	0.220335	0.82561	0.992291
ENSMUSG00000014551	Mrps25	1410.26	-0.334425	0.521503	-0.641272	0.521346	0.97479
ENSMUSG00000014554	Dguok	376.628	-0.277543	0.382711	-0.725202	0.468328	0.973341
ENSMUSG00000014592	Camta1	609.828	-0.16138	0.309178	-0.521965	0.601695	0.978563
ENSMUSG00000014599	Csf1	54.7144	0.107497	0.945454	0.113699	0.909476	0.996237
ENSMUSG00000014601	Strip1	749.059	0.301013	0.300264	1.00249	0.316106	0.959029
ENSMUSG00000014602	Kif1a	2.35743	-0.239082	3.48189	-0.0686646	0.945257	NA
ENSMUSG00000014606	Slc25a11	1713.46	-0.464432	0.287482	-1.61552	0.106199	0.903228
ENSMUSG00000014609	Chrne	2.21753	-1.4952	3.03397	-0.49282	0.62214	NA
ENSMUSG00000014633	Cmc2	1567.58	-0.337719	0.366389	-0.921751	0.356659	0.963904
ENSMUSG00000014668	Chfr	2271.49	0.126006	0.287595	0.438137	0.661287	0.981743
ENSMUSG00000014686	Ceacam16	15.8228	0.893309	1.38836	0.643425	0.519948	0.97479
ENSMUSG00000014704	Hoxa2	2.18068	-0.484379	3.55882	-0.136107	0.891737	NA
ENSMUSG00000014747	Ankrd53	12.7393	0.0397838	1.16904	0.0340311	0.972852	0.999164
ENSMUSG00000014748	Tex261	2322.85	-0.264478	0.2632	-1.00485	0.314968	0.958695
ENSMUSG00000014763	Fam120b	104.606	-0.108545	0.545233	-0.199081	0.8422	0.994229
ENSMUSG00000014767	Tbp	941.863	-0.0764241	0.298768	-0.255797	0.798107	0.991746
ENSMUSG00000014769	Psmb1	6159.58	-0.45903	0.292182	-1.57104	0.116173	0.920112
ENSMUSG00000014771	Pdcd2	177.735	-0.21201	0.600592	-0.353001	0.724087	0.986738
ENSMUSG00000014773	Dll1	8.57319	-0.114277	1.18962	-0.0960616	0.923472	0.997261
ENSMUSG00000014776	Nol3	26.2931	3.84544	3.59882	1.06853	0.285282	0.954074
ENSMUSG00000014778	Fhod1	145.181	-0.0783222	0.518093	-0.151174	0.879839	0.996155
ENSMUSG00000014786	Slc9a5	8.79985	-0.0282403	1.41748	-0.0199229	0.984105	0.999649
ENSMUSG00000014791	Elmo3	1308.53	-0.559107	0.332763	-1.68019	0.0929195	0.887924
ENSMUSG00000014813	Stc1	1.92197	0.360947	3.72024	0.0970223	0.922709	NA
ENSMUSG00000014837	4931428F04Rik	74.0036	1.01455	0.588077	1.7252	0.0844921	0.874294
ENSMUSG00000014846	Tppp3	463.637	-0.719846	0.403777	-1.78278	0.0746218	0.864806
ENSMUSG00000014850	Msh3	710.959	-0.00697723	0.327004	-0.0213368	0.982977	0.999649
ENSMUSG00000021179	Nrde2	822.562	0.722804	0.298928	2.41798	0.0156067	0.561702
ENSMUSG00000014856	Tmem208	923.394	-0.315066	0.371347	-0.848441	0.396193	0.966837
ENSMUSG00000014859	E2f4	25068.4	-0.283281	0.262002	-1.08122	0.2796	0.953915
ENSMUSG00000014867	Surf4	2289.03	-0.13336	0.276552	-0.482222	0.629648	0.979733
ENSMUSG00000014873	Surf2	398.117	-0.233296	0.41667	-0.559906	0.575544	0.978563
ENSMUSG00000014905	Dnajb9	2561.92	0.339685	0.349699	0.971362	0.331368	0.962733
ENSMUSG00000014907	Naf1	380.446	0.0806414	0.408319	0.197496	0.843439	0.994229
ENSMUSG00000014932	Yes1	10.8944	1.58648	1.87906	0.844295	0.398505	0.967051
ENSMUSG00000014956	Ppp1cb	76806.6	0.170819	0.380843	0.448528	0.653772	0.980124
ENSMUSG00000014959	Gorasp2	981.945	-0.338736	0.321948	-1.05214	0.292733	0.954995
ENSMUSG00000014980	Tsen15	386.483	0.0517319	0.33331	0.155207	0.876658	0.996155
ENSMUSG00000015001	Oc90	0.795916	-1.97444	3.96957	-0.497395	0.618911	NA
ENSMUSG00000015002	Efr3a	1029.93	0.369141	0.301706	1.22351	0.221136	0.949699
ENSMUSG00000015013	Trappc2l	567.208	-0.394666	0.374874	-1.0528	0.292434	0.954995
ENSMUSG00000015016	Acsf3	320.581	-0.252494	0.361318	-0.698813	0.484669	0.974468
ENSMUSG00000015023	Ddx19a	3915.69	0.0681482	0.254237	0.26805	0.788661	0.991317
ENSMUSG00000015027	Galns	68.2808	-0.211243	0.663788	-0.318239	0.750304	0.99034
ENSMUSG00000015053	Gata2	128.55	0.133702	0.540718	0.247268	0.804701	0.991746
ENSMUSG00000015083	C8g	19.6557	-0.14077	0.855422	-0.164562	0.869289	0.996155
ENSMUSG00000015085	Entpd2	1.69962	0.188747	3.83505	0.0492163	0.960747	NA
ENSMUSG00000015087	Rabl6	1533.94	0.207259	0.283083	0.732147	0.464079	0.973341
ENSMUSG00000015090	Ptgds	0.801774	-3.15954	3.9617	-0.797521	0.425148	NA
ENSMUSG00000015092	Edf1	3395	-0.563622	0.268475	-2.09935	0.0357861	0.719939
ENSMUSG00000015093	Clic3	5.22391	0.885269	1.7849	0.495976	0.619911	0.979733
ENSMUSG00000015094	Npdc1	0.64142	-2.83839	3.97528	-0.71401	0.475221	NA
ENSMUSG00000015095	Fbxw5	1145.79	-0.137746	0.264543	-0.520696	0.602579	0.978563
ENSMUSG00000015112	Slc25a13	173.255	0.0807449	0.500027	0.161481	0.871714	0.996155
ENSMUSG00000015120	Ube2i	6007.27	-0.152305	0.294965	-0.516349	0.605611	0.979733
ENSMUSG00000015126	Tsr3	287.322	-0.882774	0.512635	-1.72203	0.0850641	0.874381
ENSMUSG00000015127	Unkl	1933.47	0.211732	0.386473	0.547858	0.58379	0.978563
ENSMUSG00000015133	Lrrk1	189.185	0.830671	0.598136	1.38877	0.164904	0.940783
ENSMUSG00000015134	Aldh1a3	1.01007	3.48134	3.95215	0.880874	0.378386	NA
ENSMUSG00000015143	Actn1	187.333	1.19523	0.632185	1.89063	0.0586734	0.833913
ENSMUSG00000015149	Sirt2	951.299	-0.114368	0.299973	-0.38126	0.703011	0.985194
ENSMUSG00000015165	Hnrnpl	13057.6	-0.0765727	0.25168	-0.304246	0.76094	0.990929
ENSMUSG00000015176	Nolc1	2582.86	-0.199128	0.353248	-0.563707	0.572954	0.978563
ENSMUSG00000015189	Casd1	187.181	0.170953	0.50886	0.335953	0.736906	0.98884
ENSMUSG00000015202	Cnksr3	76.835	0.221942	0.533767	0.415803	0.677554	0.984371
ENSMUSG00000015214	Mtmr1	676.823	-0.0378642	0.337118	-0.112317	0.910572	0.996237
ENSMUSG00000015217	Hmgb3	4447.56	0.061672	0.300467	0.205254	0.837374	0.993683
ENSMUSG00000015222	Map2	2.31699	-0.0630785	3.01001	-0.0209562	0.983281	NA
ENSMUSG00000015243	Abca1	369.252	1.18445	0.695255	1.70363	0.0884509	0.877439
ENSMUSG00000015247	Nipsnap3b	532.354	-0.204021	0.369245	-0.552537	0.580581	0.978563
ENSMUSG00000015289	Lage3	913.011	-0.35425	0.388338	-0.912221	0.361652	0.963904
ENSMUSG00000015290	Ubl4a	1685.54	-0.105293	0.295248	-0.356626	0.721372	0.986186
ENSMUSG00000015291	Gdi1	4818.64	-0.0461421	0.259208	-0.178012	0.858714	0.996155
ENSMUSG00000015305	Sash1	68.5391	1.24864	0.746536	1.67257	0.0944113	0.888801
ENSMUSG00000015312	Gadd45b	324.015	0.542786	0.572995	0.947279	0.343497	0.963904
ENSMUSG00000015314	Slamf6	234.262	0.554666	0.741647	0.747885	0.454529	0.971004
ENSMUSG00000015316	Slamf1	306.145	-0.197277	0.654319	-0.3015	0.763033	0.990929
ENSMUSG00000015335	Zdhhc12	129.171	-0.841454	0.482308	-1.74464	0.0810477	0.866125
ENSMUSG00000015337	Endog	79.1441	-0.149438	0.746575	-0.200165	0.841352	0.994229
ENSMUSG00000015340	Cybb	651.406	0.170523	1.12979	0.150934	0.880028	0.996155
ENSMUSG00000015341	Golga7	5858.37	-0.410643	0.280288	-1.46508	0.1429	0.940783
ENSMUSG00000015342	Xk	6602.71	-0.218652	0.298546	-0.732389	0.463931	0.973341
ENSMUSG00000015354	Pcolce2	2.02693	0.991196	3.65523	0.271172	0.786259	NA
ENSMUSG00000015355	Cd48	156.613	-0.154941	0.511825	-0.302722	0.762102	0.990929
ENSMUSG00000015357	Clpx	2339.93	-0.28679	0.264378	-1.08477	0.278022	0.953915
ENSMUSG00000015363	Trabd	860.853	-0.517759	0.287491	-1.80096	0.0717091	0.862229
ENSMUSG00000015377	Dennd6b	228.964	0.027512	0.352306	0.0780911	0.937756	0.997825
ENSMUSG00000039270	Megf9	652.609	0.724158	0.297546	2.43377	0.0149424	0.55418
ENSMUSG00000015401	Tmem27	34.1505	-0.506914	0.733676	-0.690923	0.489614	0.974468
ENSMUSG00000015405	Ace2	20.4566	0.582658	0.954369	0.610516	0.54152	0.977582
ENSMUSG00000015437	Gzmb	34.4253	0.868755	2.53921	0.342136	0.732248	0.988439
ENSMUSG00000015451	C4a	42.7988	-0.206498	0.677324	-0.304874	0.760462	0.990929
ENSMUSG00000015452	Ager	26.7915	0.421488	0.850007	0.495864	0.61999	0.979733
ENSMUSG00000015461	Atf6b	1063.04	-0.592003	0.340436	-1.73895	0.0820428	0.866817
ENSMUSG00000015467	Egfl8	12.9553	-0.0909107	1.41868	-0.0640811	0.948906	0.997955
ENSMUSG00000015468	Notch4	2.26077	0.881359	3.51619	0.250657	0.802079	NA
ENSMUSG00000015474	Ppt2	183.636	-0.528059	0.552829	-0.955195	0.339479	0.963675
ENSMUSG00000015476	Prrt1	5.32011	0.125341	2.37551	0.0527639	0.95792	0.998383
ENSMUSG00000015478	Rnf5	2638.83	-0.484861	0.266329	-1.82053	0.0686777	0.850245
ENSMUSG00000015484	Fam163a	1.07459	3.56086	3.94975	0.901542	0.3673	NA
ENSMUSG00000015488	Cacfd1	185.31	-0.0744344	0.548892	-0.135608	0.892131	0.996237
ENSMUSG00000015501	Hivep2	201.373	1.30334	1.73014	0.753319	0.451258	0.970631
ENSMUSG00000015522	Arnt	2423.94	-0.181891	0.320942	-0.56674	0.570891	0.97823
ENSMUSG00000015533	Itga2	5.93453	0.649217	2.00279	0.324156	0.74582	0.99034
ENSMUSG00000015536	Mocs2	837.749	-0.305238	0.320067	-0.953671	0.34025	0.963675
ENSMUSG00000015542	Nat9	146.354	-0.91351	0.534006	-1.71067	0.0871418	0.875789
ENSMUSG00000026110	Mgat4a	447.164	0.726238	0.329672	2.20291	0.0276011	0.654829
ENSMUSG00000015575	Atp6v0e	2285.72	-0.281599	0.296242	-0.95057	0.341823	0.963904
ENSMUSG00000015597	Zfp318	581.173	0.922758	0.497542	1.85463	0.063649	0.839886
ENSMUSG00000015599	Ttbk1	11.1982	1.58948	1.37385	1.15695	0.247294	0.951363
ENSMUSG00000015605	Srf	1683.85	0.107101	0.257483	0.415954	0.677443	0.984371
ENSMUSG00000015619	Gata3	18.3361	1.56186	1.58557	0.985044	0.324602	0.961013
ENSMUSG00000015647	Lama5	323.386	0.716712	0.595024	1.20451	0.228393	0.950083
ENSMUSG00000015652	Steap1	0.33895	-1.91125	4.03604	-0.473546	0.635824	NA
ENSMUSG00000015656	Hspa8	23362.9	-0.237236	0.345251	-0.687142	0.491994	0.974468
ENSMUSG00000015659	Serac1	89.1527	0.228834	0.484446	0.472363	0.636668	0.980116
ENSMUSG00000015665	Awat1	0.537297	2.57441	3.99083	0.64508	0.518876	NA
ENSMUSG00000015668	Pdzd11	1995.74	-0.368997	0.375198	-0.983473	0.325374	0.961013
ENSMUSG00000015671	Psma2	8844.93	-0.454389	0.263732	-1.72292	0.0849037	0.874381
ENSMUSG00000015672	Mrpl32	1449.35	-0.278923	0.283657	-0.98331	0.325455	0.961013
ENSMUSG00000015697	Setdb1	2130.26	0.19596	0.309877	0.632378	0.52714	0.974961
ENSMUSG00000015702	Anxa9	91.9068	0.147565	0.527842	0.279563	0.779813	0.990929
ENSMUSG00000015711	Prune1	602.354	0.267915	0.301162	0.889605	0.373678	0.963904
ENSMUSG00000015714	Cers2	2519.48	-0.136943	0.332691	-0.411624	0.680615	0.984615
ENSMUSG00000015733	Capza2	2038.63	0.111409	0.309773	0.359648	0.719111	0.986186
ENSMUSG00000015745	Plekho1	254.56	0.400843	0.503589	0.795973	0.426048	0.969369
ENSMUSG00000015747	Vps45	595.596	-0.686741	0.299078	-2.29619	0.021665	0.620537
ENSMUSG00000015748	Prpf3	1849.67	-0.147245	0.271538	-0.542264	0.587637	0.978563
ENSMUSG00000015749	Anp32e	22399.9	-0.151587	0.251425	-0.602912	0.546567	0.977701
ENSMUSG00000015750	Aph1a	971.658	-0.0490368	0.297881	-0.164619	0.869244	0.996155
ENSMUSG00000015755	Tab2	8731.97	-0.0233207	0.37986	-0.061393	0.951046	0.997955
ENSMUSG00000015757	Ppil4	3237.14	0.0106174	0.294693	0.0360286	0.97126	0.999164
ENSMUSG00000015759	Cnih1	2002.06	-0.378758	0.322726	-1.17362	0.240547	0.951363
ENSMUSG00000015766	Eps8	257.36	0.0562604	0.630159	0.0892797	0.92886	0.997403
ENSMUSG00000015776	Med22	1813.11	-0.175869	0.259087	-0.678804	0.497262	0.974468
ENSMUSG00000015790	Surf1	505.861	-0.430885	0.359538	-1.19844	0.230745	0.950083
ENSMUSG00000015804	Med28	1099.98	-0.429246	0.296406	-1.44817	0.147569	0.940783
ENSMUSG00000015806	Qdpr	457.858	-0.218873	0.557097	-0.392881	0.694407	0.984916
ENSMUSG00000015812	Gnrh1	122.891	0.143702	0.582724	0.246605	0.805214	0.991746
ENSMUSG00000015837	Sqstm1	24570.2	-0.0485364	0.392599	-0.123628	0.901609	0.996237
ENSMUSG00000015839	Nfe2l2	2144.36	-0.142261	0.288406	-0.493266	0.621824	0.979733
ENSMUSG00000015843	Rxrg	0.537297	2.57441	3.99083	0.64508	0.518876	NA
ENSMUSG00000024070	Prkd3	645.335	0.729442	0.29632	2.46167	0.0138292	0.542903
ENSMUSG00000015850	Adamtsl4	14.8117	-0.259561	1.13599	-0.228488	0.819267	0.991746
ENSMUSG00000037697	Ddhd1	2971.5	0.730712	0.338404	2.15929	0.0308276	0.680322
ENSMUSG00000015869	Prpsap1	517.402	-0.0349533	0.373267	-0.0936417	0.925394	0.997261
ENSMUSG00000015879	Fam184b	0.561151	2.65129	3.98657	0.665056	0.506015	NA
ENSMUSG00000015880	Ncapg	9090.92	-0.103971	0.283681	-0.366505	0.713988	0.986186
ENSMUSG00000015882	Lcorl	1090.55	0.235672	0.359971	0.654698	0.512662	0.974468
ENSMUSG00000015889	Lta4h	1278.19	-0.477365	0.370808	-1.28737	0.197967	0.945896
ENSMUSG00000015932	Dstn	6192.77	-0.287855	0.541617	-0.531474	0.595091	0.978563
ENSMUSG00000015937	H2afy	1334.7	0.0435936	0.354939	0.12282	0.90225	0.996237
ENSMUSG00000015942	Gtf2ird2	125.863	0.15541	0.456792	0.34022	0.733691	0.98884
ENSMUSG00000015943	Bola1	428.308	-0.56933	0.458956	-1.24049	0.214794	0.947547
ENSMUSG00000015944	Gatsl2	22.6449	0.608086	1.22542	0.496228	0.619733	0.979733
ENSMUSG00000015947	Fcgr1	14.1106	1.32684	1.97635	0.671359	0.501992	0.974468
ENSMUSG00000015950	Ncf1	420.87	-0.0576207	0.659295	-0.0873975	0.930356	0.997594
ENSMUSG00000015957	Wnt11	1.68589	4.1781	3.79436	1.10113	0.270838	NA
ENSMUSG00000015961	Adss	1671.89	-0.0109062	0.300565	-0.0362855	0.971055	0.999139
ENSMUSG00000015966	Il17rb	8.30047	1.9728	1.50152	1.31387	0.188889	0.945896
ENSMUSG00000015968	Cacna1d	11.5869	0.748019	1.39352	0.536783	0.591417	0.978563
ENSMUSG00000015970	Chdh	5.89496	-0.92936	2.38207	-0.390148	0.696427	0.985012
ENSMUSG00000015971	Actr8	849.7	-0.15197	0.289689	-0.524595	0.599865	0.978563
ENSMUSG00000015994	Fnta	1027.93	-0.303393	0.307248	-0.987452	0.323421	0.961013
ENSMUSG00000016018	Skiv2l2	3879.17	-0.118438	0.253067	-0.468011	0.639777	0.980116
ENSMUSG00000016024	Lbp	14.7813	-1.25752	1.6866	-0.745594	0.455913	0.971754
ENSMUSG00000016028	Celsr1	115.343	0.460625	0.576372	0.79918	0.424186	0.968314
ENSMUSG00000016087	Fli1	231.203	0.654651	0.701702	0.932947	0.350847	0.963904
ENSMUSG00000016128	Stard13	1.53829	-4.09516	3.93558	-1.04055	0.298085	NA
ENSMUSG00000016181	Diexf	278.515	-0.199018	0.408738	-0.486908	0.626324	0.979733
ENSMUSG00000016194	Hsd11b1	34.1634	-0.926659	1.20498	-0.769023	0.441879	0.970219
ENSMUSG00000016200	Syt14	382.563	-0.745074	1.42412	-0.523181	0.600848	0.978563
ENSMUSG00000016206	H2-M3	107.28	0.514823	0.667396	0.77139	0.440476	0.970219
ENSMUSG00000016252	Atp5e	6966.92	-0.293814	0.304307	-0.965517	0.334286	0.962733
ENSMUSG00000016253	Nelfcd	6905.82	-0.264861	0.265047	-0.999298	0.31765	0.959332
ENSMUSG00000016255	Tubb1	22.0594	-1.08777	0.94482	-1.1513	0.249608	0.951363
ENSMUSG00000016256	Ctsz	1680.65	-0.0650808	0.314014	-0.207254	0.835811	0.993683
ENSMUSG00000016257	Prelid3b	4619.74	-0.42722	0.292497	-1.46059	0.144127	0.940783
ENSMUSG00000016262	Sertad4	1.96653	-4.45135	3.55791	-1.25111	0.210893	NA
ENSMUSG00000016283	H2-M2	0.448921	2.33857	4.00532	0.583866	0.55931	NA
ENSMUSG00000016308	Ube2a	1025.32	-0.375772	0.265936	-1.41302	0.157651	0.940783
ENSMUSG00000016319	Slc25a5	14115.4	-0.537946	0.373741	-1.43935	0.15005	0.940783
ENSMUSG00000016344	Ppdpf	805.408	-0.204181	0.421016	-0.484972	0.627696	0.979733
ENSMUSG00000016356	Col20a1	19.6297	0.361522	0.918326	0.393675	0.693821	0.984615
ENSMUSG00000016382	Pls3	4.72863	1.39846	2.89996	0.482234	0.62964	NA
ENSMUSG00000016386	Mpped2	1.88406	4.37068	3.58955	1.21761	0.223372	NA
ENSMUSG00000016409	Nkap	619.765	0.347395	0.319017	1.08895	0.276174	0.953915
ENSMUSG00000016427	Ndufa1	2968.13	-0.257252	0.366985	-0.700987	0.483311	0.974468
ENSMUSG00000037674	Rfx7	579.938	0.735301	0.352544	2.0857	0.0370057	0.727971
ENSMUSG00000016481	Cr1l	3197.52	-0.70594	0.282336	-2.50035	0.012407	0.518542
ENSMUSG00000016487	Ppfibp1	41.5121	-0.142086	0.637562	-0.222858	0.823646	0.992145
ENSMUSG00000016493	Cd46	245.693	0.109595	0.3726	0.294137	0.768653	0.990929
ENSMUSG00000016494	Cd34	7.37227	0.701235	1.52964	0.458432	0.646642	0.980124
ENSMUSG00000016495	Plgrkt	748.808	0.243026	0.342148	0.710295	0.477521	0.97444
ENSMUSG00000039967	Zfp292	924.195	0.741573	0.324139	2.28782	0.0221478	0.624833
ENSMUSG00000016498	Pdcd1lg2	13.7155	-0.888454	1.46008	-0.608495	0.542859	0.977701
ENSMUSG00000016503	Gtf3a	843.907	-0.550098	0.333162	-1.65114	0.0987097	0.895747
ENSMUSG00000016510	Mtif3	272.918	-0.340263	0.37711	-0.902291	0.366902	0.963904
ENSMUSG00000016520	Lnx2	174.334	0.584456	0.433446	1.34839	0.177532	0.944283
ENSMUSG00000016524	Il19	0.677899	-2.91257	3.97187	-0.733298	0.463377	NA
ENSMUSG00000016526	Dyrk3	17886.1	0.0896717	0.373798	0.239893	0.810413	0.991746
ENSMUSG00000016528	Mapkapk2	1377.3	0.131028	0.282258	0.464212	0.642496	0.980124
ENSMUSG00000016529	Il10	21.0936	-0.405493	1.63832	-0.247505	0.804517	0.991746
ENSMUSG00000016534	Lamp2	1139.76	0.0610697	0.301605	0.202483	0.839539	0.994229
ENSMUSG00000016541	Atxn10	281.792	0.0436987	0.617119	0.0708109	0.943548	0.997858
ENSMUSG00000016552	Foxred2	52.7162	-0.0664779	0.920181	-0.0722444	0.942407	0.997825
ENSMUSG00000016554	Eif3d	7591.04	-0.452757	0.296422	-1.52741	0.12666	0.923102
ENSMUSG00000016559	H3f3b	38097.7	-0.124492	0.336695	-0.369746	0.711572	0.986186
ENSMUSG00000016619	Nup50	10888.5	-0.136475	0.273449	-0.499087	0.617718	0.979733
ENSMUSG00000016624	Phf21b	2.56423	1.47477	3.39132	0.434866	0.663659	NA
ENSMUSG00000016637	Ift27	1004.9	-0.305417	0.337422	-0.905151	0.365386	0.963904
ENSMUSG00000016664	Pacsin2	7516.16	0.0714241	0.386599	0.18475	0.853425	0.995311
ENSMUSG00000016756	Cmah	398.059	0.675711	0.698483	0.967398	0.333345	0.962733
ENSMUSG00000016757	Ttll12	10273.4	-0.198968	0.312705	-0.636279	0.524594	0.97479
ENSMUSG00000016758	Bik	16.7062	-0.706349	1.33625	-0.528604	0.59708	0.978563
ENSMUSG00000016763	Scube1	15.9503	1.7076	1.09077	1.5655	0.117465	0.921023
ENSMUSG00000016831	Tox4	3600.22	-0.0791193	0.297537	-0.265914	0.790305	0.991416
ENSMUSG00000016833	Mrps18c	1956.38	-0.369036	0.358847	-1.02839	0.303765	0.955346
ENSMUSG00000016918	Sulf1	1.28284	-3.8364	3.94122	-0.973404	0.330353	NA
ENSMUSG00000016921	Srsf6	14158.4	-0.0218587	0.276379	-0.0790894	0.936962	0.997825
ENSMUSG00000016933	Plcg1	230.812	0.82144	0.535847	1.53298	0.125282	0.921023
ENSMUSG00000016940	Kctd2	559.887	0.213161	0.31436	0.678079	0.497722	0.974468
ENSMUSG00000016942	Tmprss6	45.9941	1.02118	0.651378	1.56772	0.116945	0.920788
ENSMUSG00000016946	Kctd5	761.348	0.0201557	0.295201	0.0682779	0.945564	0.997858
ENSMUSG00000016982	Pom121l2	1.85662	-1.25673	3.23696	-0.388242	0.697837	NA
ENSMUSG00000016984	Etaa1	1023.01	0.304956	0.287379	1.06116	0.288615	0.954995
ENSMUSG00000016995	Matn4	3.36745	-5.22765	3.48642	-1.49944	0.133761	NA
ENSMUSG00000016998	Svs4	0.677899	-2.91257	3.97187	-0.733298	0.463377	NA
ENSMUSG00000017002	Slpi	96.8783	-0.499729	0.7427	-0.672855	0.50104	0.974468
ENSMUSG00000017007	Rbpjl	2.90789	4.96753	3.12199	1.59114	0.111577	NA
ENSMUSG00000017009	Sdc4	263.64	1.14386	0.619641	1.846	0.0648917	0.839886
ENSMUSG00000017057	Il13ra1	20.1572	0.486921	1.32884	0.366425	0.714048	0.986186
ENSMUSG00000017119	Nbr1	15223.8	-0.100764	0.405662	-0.248393	0.80383	0.991746
ENSMUSG00000017132	Cyth1	650.093	0.997783	0.523592	1.90565	0.0566957	0.82693
ENSMUSG00000017144	Rnd3	12.6558	-1.31068	2.01195	-0.651447	0.514758	0.974468
ENSMUSG00000017146	Brca1	6034.02	0.24476	0.318379	0.768769	0.44203	0.970219
ENSMUSG00000017165	Gast	1.47757	4.01619	3.93823	1.0198	0.307825	NA
ENSMUSG00000017167	Cntnap1	5.83401	-1.68776	1.59762	-1.05642	0.290775	0.954995
ENSMUSG00000017176	Nt5c3b	171.746	-0.0848699	0.439836	-0.192958	0.846992	0.994533
ENSMUSG00000017188	Coa3	1211.44	-0.679212	0.397968	-1.7067	0.0878784	0.876365
ENSMUSG00000017195	Zpbp2	39.1386	0.786856	0.793864	0.991172	0.321602	0.959782
ENSMUSG00000017204	Gsdma	2.80811	-4.96494	3.13092	-1.58578	0.112789	NA
ENSMUSG00000017210	Med24	2156.6	0.0781076	0.279244	0.279711	0.779699	0.990929
ENSMUSG00000017221	Psmd3	8161.33	-0.31875	0.266371	-1.19664	0.231447	0.950083
ENSMUSG00000017264	Exosc10	2703.28	-0.106239	0.26337	-0.403383	0.686666	0.984615
ENSMUSG00000017286	Glod4	568.76	0.064	0.418547	0.15291	0.878469	0.996155
ENSMUSG00000017288	Vps53	478.826	-0.0478519	0.313724	-0.152529	0.87877	0.996155
ENSMUSG00000017291	Taok1	3860.47	0.317188	0.35107	0.903491	0.366265	0.963904
ENSMUSG00000017299	Dnttip1	7486.67	-0.120223	0.311356	-0.386126	0.699404	0.985194
ENSMUSG00000017300	Tnnc2	7.76266	-2.80883	2.13687	-1.31446	0.188691	0.945896
ENSMUSG00000017307	Acot8	1553	-0.323157	0.275418	-1.17333	0.240664	0.951363
ENSMUSG00000017309	Cd300lg	5.83825	3.00808	2.3163	1.29866	0.194061	0.945896
ENSMUSG00000017314	Mpp2	10363	-0.12701	0.377473	-0.336474	0.736513	0.98884
ENSMUSG00000017344	Vtn	0.64142	-2.83839	3.97528	-0.71401	0.475221	NA
ENSMUSG00000017376	Nlk	205.275	0.0350471	0.487824	0.0718438	0.942726	0.997825
ENSMUSG00000017386	Traf4	3291.81	-0.239515	0.293533	-0.815973	0.414516	0.96752
ENSMUSG00000017390	Aldoc	118.144	-0.174393	0.434183	-0.401659	0.687935	0.984615
ENSMUSG00000017400	Stac2	80.3959	1.2553	0.984655	1.27487	0.202357	0.945896
ENSMUSG00000017404	Rpl19	18643.4	-0.356793	0.334485	-1.06669	0.286111	0.954074
ENSMUSG00000017405	Nek8	1655.03	-0.0246153	0.285987	-0.0860713	0.93141	0.997825
ENSMUSG00000017412	Cacnb4	5.3203	5.84478	2.15696	2.70973	0.00673382	0.4278
ENSMUSG00000017417	Plxdc1	46.4058	0.571685	0.597115	0.95741	0.33836	0.963675
ENSMUSG00000017418	Arl5b	440.732	0.810043	0.417616	1.93968	0.052418	0.817924
ENSMUSG00000017421	Zfp207	6437.65	-0.259827	0.291932	-0.890028	0.373451	0.963904
ENSMUSG00000017428	Psmd11	4795.79	-0.0801229	0.293399	-0.273085	0.784788	0.991191
ENSMUSG00000017446	C1qtnf1	1.79002	0.796013	3.83979	0.207306	0.835771	NA
ENSMUSG00000017453	Pipox	1.44319	-4.00609	3.93741	-1.01744	0.308943	NA
ENSMUSG00000017466	Timp2	48.5733	0.483113	0.746198	0.647433	0.517352	0.97479
ENSMUSG00000017478	Zc3h18	4514.32	-0.000602687	0.27715	-0.00217459	0.998265	0.999891
ENSMUSG00000017485	Top2b	5373.67	0.291945	0.262654	1.11152	0.266344	0.953793
ENSMUSG00000017491	Rarb	1.34952	0.0125304	3.86302	0.00324368	0.997412	NA
ENSMUSG00000017493	Igfbp4	148.804	-0.534361	0.719204	-0.74299	0.457488	0.972586
ENSMUSG00000017499	Cdc6	10628.2	0.222336	0.276982	0.80271	0.422142	0.96752
ENSMUSG00000017548	Suz12	7091	0.361118	0.368946	0.978784	0.327687	0.961951
ENSMUSG00000049323	Smcr8	1742.77	0.741863	0.316032	2.34743	0.0189033	0.592667
ENSMUSG00000017561	Crlf3	8288.92	-0.238746	0.306896	-0.777938	0.436605	0.970219
ENSMUSG00000017607	Tns4	2.55568	4.80884	3.199	1.50323	0.132779	NA
ENSMUSG00000017615	Tnfaip1	193.153	-0.100126	0.431487	-0.232048	0.816501	0.991746
ENSMUSG00000017631	Abr	198.519	0.857444	0.687561	1.24708	0.212368	0.945896
ENSMUSG00000017639	Rab11fip4	34.8451	1.27433	0.96053	1.3267	0.184609	0.945896
ENSMUSG00000017652	Cd40	78.5672	0.210559	0.930123	0.226378	0.820908	0.991746
ENSMUSG00000017664	Slc35c2	271.069	0.368035	0.455645	0.807722	0.419251	0.96752
ENSMUSG00000017667	Zfp334	0.64142	-2.83839	3.97528	-0.71401	0.475221	NA
ENSMUSG00000017670	Elmo2	835.696	0.160853	0.304778	0.527769	0.59766	0.978563
ENSMUSG00000017677	Wsb1	3116.09	-0.00631003	0.322993	-0.0195361	0.984413	0.999649
ENSMUSG00000017679	Ttpal	301.672	0.482824	0.452972	1.0659	0.286468	0.954345
ENSMUSG00000017686	Rhot1	574.379	-0.0681098	0.396598	-0.171735	0.863646	0.996155
ENSMUSG00000017692	Rhbdl3	1.20892	3.72914	3.94507	0.945265	0.344523	NA
ENSMUSG00000017697	Ada	137.639	-0.17561	0.471586	-0.372382	0.709609	0.985847
ENSMUSG00000017707	Serinc3	182299	-0.047788	0.297579	-0.160589	0.872417	0.996155
ENSMUSG00000017713	Tha1	19.7847	1.63473	1.1428	1.43046	0.152586	0.940783
ENSMUSG00000017715	Pgs1	2462.41	-0.326455	0.283771	-1.15042	0.249971	0.951363
ENSMUSG00000017716	Birc5	18660.8	-0.546748	0.333343	-1.64019	0.100965	0.898083
ENSMUSG00000017718	Afmid	2778.53	0.155049	0.292738	0.52965	0.596354	0.978563
ENSMUSG00000017720	Trp53tg5	1.20329	1.28433	3.91606	0.327965	0.742938	NA
ENSMUSG00000017721	Pigt	1642.31	-0.0234052	0.275423	-0.0849789	0.932278	0.997825
ENSMUSG00000017724	Etv4	14.7604	1.19604	1.11574	1.07197	0.283734	0.954074
ENSMUSG00000017734	Dbndd2	29.3872	0.112418	0.72776	0.154472	0.877238	0.996155
ENSMUSG00000017737	Mmp9	134.681	-0.122161	0.58253	-0.209707	0.833896	0.993669
ENSMUSG00000017740	Slc12a5	3.64796	0.118177	2.62857	0.0449587	0.96414	NA
ENSMUSG00000017747	Ghdc	58.4518	0.432172	0.555346	0.778203	0.43645	0.970219
ENSMUSG00000017754	Pltp	93.0698	0.0849732	0.653844	0.12996	0.896598	0.996237
ENSMUSG00000017756	Slc12a7	87.1589	0.624377	0.479691	1.30163	0.193045	0.945896
ENSMUSG00000017760	Ctsa	887.986	0.0692387	0.368601	0.187842	0.851001	0.995311
ENSMUSG00000017764	Zswim1	235.96	-0.506371	0.375575	-1.34825	0.177577	0.944283
ENSMUSG00000017765	Slc12a4	1212.7	-0.0768746	0.352884	-0.217847	0.827548	0.992638
ENSMUSG00000017767	Spata25	2.00879	-4.48109	3.53316	-1.2683	0.204692	NA
ENSMUSG00000017774	Myo1c	2581.01	0.30195	0.321453	0.939328	0.347562	0.963904
ENSMUSG00000017776	Crk	1399.21	0.472903	0.343538	1.37657	0.168646	0.940783
ENSMUSG00000017778	Cox7c	5122	-0.439489	0.315981	-1.39087	0.164264	0.940783
ENSMUSG00000017781	Pitpna	1545.63	-0.236058	0.281664	-0.838084	0.401984	0.96752
ENSMUSG00000017801	Mlx	586.745	-0.415571	0.31485	-1.3199	0.186868	0.945896
ENSMUSG00000017802	Retreg3	6783.98	-0.090511	0.361068	-0.250675	0.802065	0.991746
ENSMUSG00000017817	Jph2	4.99381	2.37364	1.98821	1.19386	0.232533	0.950083
ENSMUSG00000029009	Mthfr	1487.12	0.742833	0.300428	2.47258	0.0134141	0.53967
ENSMUSG00000017831	Rab5a	4060.06	-0.201454	0.283403	-0.710837	0.477185	0.97444
ENSMUSG00000017832	Hspb9	25.0809	0.053334	0.967558	0.0551223	0.956041	0.99816
ENSMUSG00000017837	Nkiras2	846.309	0.370096	0.451199	0.820251	0.412073	0.96752
ENSMUSG00000017843	Ppp2r5c	4409.61	-0.131615	0.3305	-0.39823	0.690461	0.984615
ENSMUSG00000017858	Ift52	572.376	-0.02014	0.307248	-0.0655498	0.947736	0.997858
ENSMUSG00000017861	Mybl2	15071.3	0.147739	0.282476	0.523015	0.600964	0.978563
ENSMUSG00000017897	Eya2	5.73302	0.186579	2.03117	0.0918581	0.926811	0.997261
ENSMUSG00000017929	B4galt5	253.516	0.984965	0.66017	1.49199	0.135703	0.934576
ENSMUSG00000017950	Hnf4a	8.70795	0.677407	1.51072	0.448401	0.653864	0.980124
ENSMUSG00000017999	Ddx27	5022.11	-0.17829	0.250146	-0.712745	0.476004	0.97419
ENSMUSG00000018001	Cyth3	8981.24	0.265032	0.36003	0.73614	0.461645	0.973341
ENSMUSG00000018008	Cyth4	376.42	0.441624	1.17053	0.377286	0.705961	0.985194
ENSMUSG00000018012	Rac3	2.74111	2.83864	2.82466	1.00495	0.314922	NA
ENSMUSG00000018040	Rrp7a	369.054	-2.4572	1.27075	-1.93367	NA	NA
ENSMUSG00000018042	Cyb5r3	10268.8	-0.190086	0.273716	-0.694464	0.487391	0.974468
ENSMUSG00000018068	Ints2	1029.85	0.0528734	0.288459	0.183296	0.854566	0.995311
ENSMUSG00000018076	Med13l	21789	0.526982	0.447241	1.1783	0.238679	0.950628
ENSMUSG00000018102	Hist1h2bc	4481.39	-0.671072	0.409259	-1.63973	0.101062	0.898083
ENSMUSG00000018126	Baiap2l2	0.448921	2.33857	4.00532	0.583866	0.55931	NA
ENSMUSG00000018143	Mafk	28353.5	-0.104667	0.358733	-0.291769	0.770463	0.990929
ENSMUSG00000018160	Med1	2499.08	0.231943	0.331605	0.699454	0.484268	0.974468
ENSMUSG00000018166	Erbb3	47.7323	0.170355	0.883949	0.192721	0.847178	0.994533
ENSMUSG00000018167	Stard3	486.451	-0.10163	0.367396	-0.276623	0.78207	0.990929
ENSMUSG00000018168	Ikzf3	621.114	0.640384	1.31576	0.486704	0.626468	0.979733
ENSMUSG00000018169	Mfng	169.349	0.528501	0.586777	0.900685	0.367756	0.963904
ENSMUSG00000018171	Vmp1	5902.8	-0.269983	0.268176	-1.00674	0.31406	0.958654
ENSMUSG00000018189	Uchl5	2153.15	-0.637084	0.347666	-1.83246	0.066883	0.842845
ENSMUSG00000018196	Glrx2	773.461	-0.479555	0.285169	-1.68165	0.0926364	0.886446
ENSMUSG00000018199	Trove2	361.868	-1.19395	0.593113	-2.01303	0.0441118	0.765344
ENSMUSG00000018209	Stk4	2406.57	0.15299	0.288837	0.529677	0.596336	0.978563
ENSMUSG00000018217	Pmp22	1.8931	-1.3034	3.74082	-0.348427	0.72752	NA
ENSMUSG00000018238	Gdf9	11.2611	0.368276	1.21654	0.302724	0.7621	0.990929
ENSMUSG00000018239	Zcchc10	244.155	-0.482956	0.472552	-1.02202	0.306773	0.957095
ENSMUSG00000018286	Psmb6	5495.81	-0.562163	0.274316	-2.04933	0.0404301	0.733637
ENSMUSG00000018287	Spag7	1072.15	-0.65887	0.369493	-1.78317	0.0745579	0.864806
ENSMUSG00000018293	Pfn1	27125.6	-0.553162	0.285091	-1.9403	0.052343	0.817509
ENSMUSG00000018322	Tomm34	679.048	0.0419389	0.344956	0.121578	0.903233	0.996237
ENSMUSG00000018326	Ywhab	6106.4	-0.219917	0.250725	-0.877122	0.38042	0.966397
ENSMUSG00000018334	Ksr1	1148.5	0.00464291	0.508017	0.00913929	0.992708	0.999839
ENSMUSG00000018339	Gpx3	36.7596	-0.327421	0.911896	-0.359055	0.719554	0.986186
ENSMUSG00000018340	Anxa6	505.958	0.570583	0.616765	0.925123	0.354902	0.963904
ENSMUSG00000018341	Il12rb2	10.5456	0.384062	1.6884	0.227471	0.820057	0.991746
ENSMUSG00000018347	Zkscan6	307.411	-0.0100109	0.327428	-0.0305742	0.975609	0.999544
ENSMUSG00000018362	Kpna2	7089.96	-0.469843	0.299888	-1.56673	0.117178	0.921023
ENSMUSG00000018363	Smurf2	668.325	0.339013	0.321847	1.05334	0.292186	0.954995
ENSMUSG00000018372	Cep95	1187.16	-0.137706	0.280811	-0.490386	0.623861	0.979733
ENSMUSG00000018377	Vezf1	848.233	0.233155	0.283879	0.821319	0.411465	0.96752
ENSMUSG00000018378	Cuedc1	2.9489	-1.15191	3.24521	-0.354956	0.722622	NA
ENSMUSG00000018379	Srsf1	4225.74	-0.249761	0.245762	-1.01627	0.3095	0.957826
ENSMUSG00000018381	Abi3	1389.65	-0.00371428	0.516719	-0.00718821	0.994265	0.999839
ENSMUSG00000018395	Kif3a	288.66	-0.318705	0.333689	-0.955097	0.339529	0.963675
ENSMUSG00000018398	2021-09-08	7662.13	-0.628338	0.377893	-1.66274	0.0963649	0.891573
ENSMUSG00000018401	Mtmr4	2327.7	0.325603	0.358754	0.907595	0.364092	0.963904
ENSMUSG00000018405	Mrm1	6211.26	-0.0209307	0.309114	-0.0677119	0.946015	0.997858
ENSMUSG00000018411	Mapt	6.55114	1.71955	1.60554	1.07101	0.284164	0.954074
ENSMUSG00000021820	Camk2g	222.569	0.746858	0.371297	2.01148	0.0442746	0.766122
ENSMUSG00000018415	Gid4	1069.52	0.168746	0.304388	0.554377	0.579321	0.978563
ENSMUSG00000018417	Myo1b	8.84662	1.67035	1.79654	0.929758	0.352496	0.963904
ENSMUSG00000018425	Dhx40	3127.64	-0.0705781	0.301416	-0.234155	0.814865	0.991746
ENSMUSG00000018427	Ypel2	51.5466	0.655506	0.600422	1.09174	0.274946	0.953915
ENSMUSG00000018428	Akap1	324.258	-0.266288	0.425203	-0.62626	0.531144	0.976048
ENSMUSG00000018433	Nol11	1013.31	-0.338434	0.359644	-0.941025	0.346692	0.963904
ENSMUSG00000018442	Derl2	1062.21	-0.19498	0.301728	-0.646209	0.518144	0.97479
ENSMUSG00000018446	C1qbp	2822.81	-0.517429	0.449202	-1.15188	0.249369	0.951363
ENSMUSG00000018449	Rpain	2852.99	-0.219355	0.303366	-0.723071	0.469636	0.973341
ENSMUSG00000018451	6330403K07Rik	76.4547	0.332517	0.555323	0.59878	0.54932	0.977701
ENSMUSG00000018459	Slc13a3	1.18005	0.428024	3.88512	0.11017	0.912274	NA
ENSMUSG00000018470	Kcnab3	3.35209	0.583993	2.68613	0.21741	0.827889	NA
ENSMUSG00000018474	Chd3	2899.25	0.577863	0.605595	0.954207	0.339979	0.963675
ENSMUSG00000033713	Foxn3	3730.8	0.748796	0.347716	2.15347	0.0312817	0.683867
ENSMUSG00000018479	1700125H20Rik	5.05535	-1.75422	2.37108	-0.739839	0.459397	0.973171
ENSMUSG00000018481	Appbp2	1053.35	0.0784393	0.284385	0.275821	0.782686	0.990929
ENSMUSG00000020716	Nf1	299.638	0.752326	0.345083	2.18013	0.0292477	0.669963
ENSMUSG00000018501	Ncor1	9148.45	0.549582	0.407684	1.34806	0.17764	0.944283
ENSMUSG00000018507	Trpv2	728.99	-0.0291033	0.360478	-0.0807352	0.935653	0.997825
ENSMUSG00000018509	Cenpv	532.92	0.197548	0.33215	0.594757	0.552006	0.977701
ENSMUSG00000018537	Pcgf2	8.42192	-0.0887392	1.49107	-0.0595137	0.952543	0.997955
ENSMUSG00000018541	Cwc25	1212.69	0.446759	0.309894	1.44165	0.149401	0.940783
ENSMUSG00000018543	1700001P01Rik	5.07038	0.568284	1.75728	0.323389	0.746401	0.99034
ENSMUSG00000018547	Pip4k2b	523.274	0.056835	0.430602	0.13199	0.894993	0.996237
ENSMUSG00000018548	Trim37	5076.49	-0.161692	0.330271	-0.489572	0.624437	0.979733
ENSMUSG00000018554	Ybx2	52.9647	-0.898883	0.620093	-1.44959	0.147172	0.940783
ENSMUSG00000018559	Ctdnep1	2370.8	-0.0487209	0.299244	-0.162813	0.870665	0.996155
ENSMUSG00000018565	Elp5	1949.78	-0.592228	0.28014	-2.11404	0.0345118	0.708613
ENSMUSG00000018566	Slc2a4	5628.1	-0.174457	0.274902	-0.634615	0.52568	0.974797
ENSMUSG00000018567	Gabarap	13696.4	-0.282288	0.303058	-0.931464	0.351614	0.963904
ENSMUSG00000018569	Cldn7	11.0367	-0.108575	1.51342	-0.0717412	0.942808	0.997825
ENSMUSG00000018570	2810408A11Rik	42.2642	0.118974	0.777134	0.153094	0.878324	0.996155
ENSMUSG00000018572	Phf23	982.419	-0.538031	0.273145	-1.96977	0.0488652	0.79862
ENSMUSG00000018574	Acadvl	4637.34	-0.370713	0.321868	-1.15175	0.249422	0.951363
ENSMUSG00000018581	Dnah11	0.671622	2.89118	3.9746	0.727414	0.466972	NA
ENSMUSG00000018583	G3bp1	8055.42	-0.246076	0.301361	-0.816549	0.414186	0.96752
ENSMUSG00000018585	Atox1	1401.83	-0.288293	0.332376	-0.867369	0.38574	0.966397
ENSMUSG00000018593	Sparc	25.9221	-0.497383	1.06541	-0.466848	0.640609	0.980116
ENSMUSG00000018599	Mief2	58.2814	0.305593	0.64521	0.473633	0.635761	0.980116
ENSMUSG00000018604	Tbx3	2.68167	4.84668	3.22929	1.50085	0.133394	NA
ENSMUSG00000018648	Dusp14	2.72603	-4.92286	3.73081	-1.31951	0.186998	NA
ENSMUSG00000018651	Tada2a	245.592	-0.449043	0.487952	-0.920261	0.357436	0.963904
ENSMUSG00000018654	Ikzf1	5288.54	0.239442	0.274376	0.87268	0.382838	0.966397
ENSMUSG00000018659	Pnpo	109714	-0.154131	0.393576	-0.391616	0.695342	0.98501
ENSMUSG00000018661	Cog1	2261.65	-0.171437	0.27637	-0.620318	0.535048	0.977178
ENSMUSG00000018666	Cbx1	2307.27	-0.37422	0.343593	-1.08914	0.276093	0.953915
ENSMUSG00000018669	Cdk5rap3	1417.46	-0.280455	0.273069	-1.02705	0.304397	0.956136
ENSMUSG00000018672	Copz2	3.05659	5.05421	2.62316	1.92676	0.0540089	NA
ENSMUSG00000018677	Slc25a39	68880.6	0.302459	0.511144	0.591729	0.554032	0.977701
ENSMUSG00000018678	Sp2	5969.23	0.180729	0.343912	0.525511	0.599228	0.978563
ENSMUSG00000018697	Aatf	444.117	-0.34292	0.441498	-0.776719	0.437324	0.970219
ENSMUSG00000018707	Dync1h1	9641.5	0.292268	0.423647	0.689887	0.490266	0.974468
ENSMUSG00000018727	Cpsf4l	5.24	0.480456	2.00299	0.239869	0.810432	0.991746
ENSMUSG00000018733	Pex12	105.256	-0.0726353	0.440289	-0.164972	0.868966	0.996155
ENSMUSG00000018736	Ndel1	2790.89	-0.121758	0.290857	-0.418619	0.675494	0.983708
ENSMUSG00000018740	Slc25a35	43.9393	-0.818966	0.994383	-0.823592	0.410172	0.96752
ENSMUSG00000018750	Zbtb4	189.461	0.659889	0.589022	1.12031	0.262581	0.952972
ENSMUSG00000018752	Tnfsfm13	20.0697	-0.185192	1.1917	-0.155402	0.876505	0.996155
ENSMUSG00000018761	Mpdu1	1509.93	-0.195759	0.307849	-0.635893	0.524846	0.97479
ENSMUSG00000018765	Fxr2	4863.32	-0.0285959	0.249517	-0.114605	0.908758	0.996237
ENSMUSG00000018770	Atp5g3	7613.61	-0.47268	0.331525	-1.42577	0.153934	0.940783
ENSMUSG00000018774	Cd68	315.49	0.806987	0.563211	1.43283	0.151906	0.940783
ENSMUSG00000018776	Slc35g3	1.36222	-1.47912	3.8896	-0.380275	0.703741	NA
ENSMUSG00000018796	Acsl1	21585.6	0.422124	0.376512	1.12114	0.262227	0.952972
ENSMUSG00000018800	Abca5	19.7629	0.643714	0.994254	0.647434	0.517351	0.97479
ENSMUSG00000018809	Smyd4	285.917	0.443598	0.337751	1.31339	0.189052	0.945896
ENSMUSG00000018819	Lsp1	579.336	-0.0126172	0.604981	-0.0208555	0.983361	0.999649
ENSMUSG00000018820	Zfyve27	781.16	0.0316521	0.308051	0.102749	0.918162	0.997187
ENSMUSG00000018821	Avpi1	16.1638	0.58884	1.35143	0.435715	0.663043	0.981822
ENSMUSG00000018822	Sfrp5	2.25331	1.33754	3.52842	0.379075	0.704632	NA
ENSMUSG00000018830	Myh11	7.83927	0.086927	1.57715	0.0551164	0.956046	0.99816
ENSMUSG00000018841	Rad51d	283.744	-0.149448	0.361848	-0.413011	0.679598	0.984371
ENSMUSG00000018845	Unc45b	3.94593	0.889094	2.65847	0.334438	0.738049	NA
ENSMUSG00000018846	Pank3	743.746	0.614172	0.326849	1.87907	0.0602354	0.838254
ENSMUSG00000018848	Rars	1659.72	-0.426631	0.325309	-1.31146	0.189702	0.945896
ENSMUSG00000018849	Wwc1	1.9292	0.349441	3.71608	0.0940348	0.925082	NA
ENSMUSG00000018858	Mrpl58	495.617	-0.689092	0.398989	-1.72709	0.0841512	0.874166
ENSMUSG00000018861	Fdxr	175.203	-0.471016	0.41718	-1.12905	0.258877	0.952972
ENSMUSG00000018882	Mrpl45	776.433	-0.278478	0.396904	-0.701626	0.482912	0.974468
ENSMUSG00000018899	Irf1	375.214	0.868655	0.510492	1.7016	0.0888295	0.877529
ENSMUSG00000018900	Slc22a5	109.781	0.316239	0.456997	0.691993	0.488942	0.974468
ENSMUSG00000018906	P4ha2	8.608	-2.22079	1.58123	-1.40447	0.16018	0.940783
ENSMUSG00000018909	Arrb1	13659.8	-0.0343938	0.370078	-0.0929366	0.925954	0.997261
ENSMUSG00000018916	Csf2	0.448921	2.33857	4.00532	0.583866	0.55931	NA
ENSMUSG00000018919	Tm4sf5	1.1486	3.60048	3.9486	0.911838	0.361854	NA
ENSMUSG00000018920	Cxcl16	15.8077	1.91932	1.19364	1.60796	0.107845	0.90408
ENSMUSG00000018921	Pelp1	1103.35	0.169854	0.289384	0.58695	0.557238	0.977701
ENSMUSG00000018923	Med11	258.159	0.130245	0.373007	0.349175	0.726958	0.98714
ENSMUSG00000018924	Alox15	22.0906	0.459548	0.910285	0.50484	0.613671	0.979733
ENSMUSG00000018925	Heatr9	1.44737	0.346105	3.85525	0.0897749	0.928466	NA
ENSMUSG00000018927	Ccl6	203.939	0.677169	0.518938	1.30491	0.191923	0.945896
ENSMUSG00000018930	Ccl4	108.01	-1.24452	0.822596	-1.51292	0.130299	0.933456
ENSMUSG00000018931	Natd1	10690.5	-0.25155	0.310557	-0.809998	0.417942	0.96752
ENSMUSG00000018932	Map2k3	21777.7	-0.13145	0.29268	-0.449126	0.653341	0.980124
ENSMUSG00000018965	Ywhah	16295.7	-0.145027	0.263956	-0.549437	0.582706	0.978563
ENSMUSG00000018973	Hoxb1	0.671622	2.89118	3.9746	0.727414	0.466972	NA
ENSMUSG00000018974	Sart3	2737.12	0.0481555	0.262565	0.183404	0.854481	0.995311
ENSMUSG00000018983	E2f2	183583	0.374467	0.417014	0.897973	0.3692	0.963904
ENSMUSG00000018986	Slfn3	233.919	-0.00253229	0.356602	-0.00710117	0.994334	0.999839
ENSMUSG00000018995	Nars2	669.71	0.226347	0.311631	0.72633	0.467637	0.973341
ENSMUSG00000018999	Slc35b4	2206.11	0.115312	0.496669	0.232171	0.816405	0.991746
ENSMUSG00000019027	Dnah1	10.74	0.728917	1.37245	0.531105	0.595346	0.978563
ENSMUSG00000019039	Dalrd3	781.677	-0.418764	0.355992	-1.17633	0.239463	0.950628
ENSMUSG00000019054	Fis1	13653.1	0.243287	0.38542	0.631226	0.527893	0.974961
ENSMUSG00000019055	Plod1	63.3372	1.33181	0.800948	1.6628	0.0963531	0.891573
ENSMUSG00000019066	Rab3d	83.261	-0.30335	0.488101	-0.621491	0.534276	0.976661
ENSMUSG00000019080	Mfsd3	64.5172	-0.123508	0.544233	-0.226939	0.820471	0.991746
ENSMUSG00000019082	Slc25a22	498.636	0.54141	0.404006	1.3401	0.180211	0.9446
ENSMUSG00000019087	Atp6ap1	5007.61	-0.273838	0.2783	-0.98397	0.32513	0.961013
ENSMUSG00000019088	Dnase1l1	1774.29	-0.515017	0.286603	-1.79697	0.0723398	0.862717
ENSMUSG00000019102	Aldh3a1	0.64142	-2.83839	3.97528	-0.71401	0.475221	NA
ENSMUSG00000019122	Ccl9	59.6397	0.20765	0.945986	0.219506	0.826256	0.992346
ENSMUSG00000019124	Scrn1	0.677899	-2.91257	3.97187	-0.733298	0.463377	NA
ENSMUSG00000019132	BC005537	28499	0.376919	0.371451	1.01472	0.310239	0.957826
ENSMUSG00000019139	Isyna1	1453.98	-0.42392	0.292541	-1.4491	0.14731	0.940783
ENSMUSG00000019143	Hars2	562.758	-0.271943	0.312794	-0.8694	0.384628	0.966397
ENSMUSG00000019158	Tmem160	733.842	-0.0707372	0.311978	-0.226738	0.820628	0.991746
ENSMUSG00000019173	Rab5c	9030.01	-0.262101	0.284951	-0.91981	0.357672	0.963904
ENSMUSG00000019179	Mdh2	13381.8	-0.46968	0.249558	-1.88205	0.0598292	0.838254
ENSMUSG00000019188	H13	1421.49	-0.358554	0.300749	-1.1922	0.233182	0.950083
ENSMUSG00000019189	Rnf145	13887.3	-0.287557	0.33617	-0.85539	0.392335	0.966617
ENSMUSG00000019194	Scn1b	5.51936	2.83427	2.738	1.03516	0.300594	0.955214
ENSMUSG00000019210	Atp6v1e1	9359.84	-0.37526	0.261126	-1.43708	0.150694	0.940783
ENSMUSG00000019214	Chtf18	3861.04	-0.0120238	0.265938	-0.0452128	0.963938	0.998543
ENSMUSG00000019230	Lhx9	0.671622	2.89118	3.9746	0.727414	0.466972	NA
ENSMUSG00000019232	Etnppl	1.59752	4.10038	3.86433	1.06108	0.288652	NA
ENSMUSG00000019235	Rps6kl1	55.2721	0.51227	0.577062	0.887721	0.374691	0.963904
ENSMUSG00000019254	Ppp1r12c	3055.2	-0.0469964	0.316779	-0.148357	0.882061	0.996155
ENSMUSG00000019256	Ahr	69.5905	1.23304	0.758311	1.62603	0.103942	0.903228
ENSMUSG00000019261	Map1s	811.764	-0.227654	0.298379	-0.762969	0.445482	0.970219
ENSMUSG00000019278	Dpep1	0.33895	-1.91125	4.03604	-0.473546	0.635824	NA
ENSMUSG00000019295	Tmem129	998.77	-0.176167	0.337851	-0.521435	0.602063	0.978563
ENSMUSG00000019297	Nop9	1385.47	-0.179125	0.314455	-0.569634	0.568926	0.977723
ENSMUSG00000019301	Hsd17b1	1.63575	4.16492	3.77787	1.10245	0.270265	NA
ENSMUSG00000019302	Atp6v0a1	11870	0.18288	0.40409	0.452571	0.650858	0.980124
ENSMUSG00000019303	Psmc3ip	733.641	-0.260699	0.359462	-0.725249	0.4683	0.973341
ENSMUSG00000019312	Grb7	8.55217	0.798188	1.6899	0.472329	0.636692	0.980116
ENSMUSG00000019320	Noxo1	18.4031	-0.131856	0.970307	-0.135891	0.891908	0.996237
ENSMUSG00000039629	Strip2	219.942	0.752396	0.349254	2.1543	0.0312169	0.683867
ENSMUSG00000019338	Zfp687	622.712	0.325052	0.346004	0.939444	0.347503	0.963904
ENSMUSG00000035623	Rsf1	1997.57	0.753292	0.343039	2.19594	0.0280966	0.658418
ENSMUSG00000019362	D8Ertd738e	5011.36	-0.597829	0.293255	-2.0386	0.0414902	0.743524
ENSMUSG00000019370	Calm3	22496.3	-0.236345	0.260493	-0.907299	0.364249	0.963904
ENSMUSG00000019373	Cops3	1465.37	-0.187589	0.346436	-0.541483	0.588175	0.978563
ENSMUSG00000019428	Fkbp8	11658.8	-0.415678	0.306623	-1.35566	0.175206	0.944283
ENSMUSG00000019429	Ffar3	0.90236	-1.31981	3.93388	-0.335499	0.737249	NA
ENSMUSG00000019432	Ddx39b	7100.59	-0.0386256	0.265535	-0.145463	0.884345	0.996155
ENSMUSG00000019433	Gipc1	673.148	0.112287	0.405905	0.276634	0.782061	0.990929
ENSMUSG00000019437	Tlcd1	5753.53	-0.0954021	0.279312	-0.341561	0.732681	0.988549
ENSMUSG00000019461	Plscr3	1607.92	-0.240594	0.278444	-0.864068	0.387551	0.966397
ENSMUSG00000022914	Brwd1	576.245	0.753362	0.341069	2.20883	0.0271866	0.651669
ENSMUSG00000019467	Arhgef25	125.831	0.489334	0.509454	0.960508	0.336799	0.963562
ENSMUSG00000019470	Xab2	2741.01	-0.0995006	0.265888	-0.374219	0.708241	0.985473
ENSMUSG00000019471	Cdc37	7027.53	-0.293639	0.279466	-1.05071	0.29339	0.954995
ENSMUSG00000019478	Rab4a	154.498	-0.463292	0.476387	-0.972512	0.330796	0.962733
ENSMUSG00000019487	Trip10	25.1625	-0.582514	0.860957	-0.676589	0.498667	0.974468
ENSMUSG00000019494	Cops6	3906.97	-0.374923	0.258921	-1.44802	0.147612	0.940783
ENSMUSG00000019505	Ubb	223250	0.19338	0.363564	0.531902	0.594794	0.978563
ENSMUSG00000019518	Ap4m1	1444.08	0.381747	0.302833	1.26059	0.207457	0.945896
ENSMUSG00000019528	Gyg	396.701	-0.0626159	0.444213	-0.140959	0.887902	0.996237
ENSMUSG00000019539	Rcn3	40.9185	-0.170569	0.82034	-0.207925	0.835287	0.993669
ENSMUSG00000019558	Slc6a8	18.5358	0.748115	1.3143	0.569212	0.569212	0.977723
ENSMUSG00000019564	Arid3a	383.988	-0.651611	0.329352	-1.97846	0.0478764	0.787793
ENSMUSG00000019577	Pdk4	1.53829	-4.09516	3.93558	-1.04055	0.298085	NA
ENSMUSG00000019578	Ubxn6	1124.75	-0.00585993	0.26687	-0.021958	0.982481	0.999649
ENSMUSG00000019579	Mydgf	1067.22	-0.391281	0.317512	-1.23233	0.217825	0.948199
ENSMUSG00000019590	Cyb561	5.95334	0.258807	2.30137	0.112458	0.91046	0.996237
ENSMUSG00000019659	Ccdc12	1126.24	-0.698215	0.288395	-2.42104	0.0154762	0.561702
ENSMUSG00000019689	Fmc1	579.359	-0.953004	0.37289	-2.55573	0.0105966	0.486057
ENSMUSG00000019699	Akt3	913.78	0.121702	0.371505	0.327593	0.74322	0.990218
ENSMUSG00000019710	Mrpl24	1051.32	-0.237185	0.344944	-0.687605	0.491701	0.974468
ENSMUSG00000019715	Gle1	2516.58	-0.109088	0.276227	-0.394921	0.692901	0.984615
ENSMUSG00000019726	Lyst	485.837	0.609303	0.4109	1.48285	0.138114	0.938986
ENSMUSG00000019731	Slc35e1	1815.42	0.325832	0.297043	1.09692	0.272677	0.953915
ENSMUSG00000019732	Calr3	5.33445	-0.710789	1.7302	-0.410812	0.68121	0.984615
ENSMUSG00000019734	Tmc4	65.6134	-0.633828	0.589318	-1.07553	0.282138	0.954074
ENSMUSG00000069729	Arid1b	1160.49	0.7634	0.36687	2.08084	0.0374482	0.727971
ENSMUSG00000019738	Polr2i	357.107	-0.419283	0.479884	-0.873717	0.382272	0.966397
ENSMUSG00000019761	Krt10	18.0484	-0.822543	0.968942	-0.848908	0.395932	0.966837
ENSMUSG00000019763	Rmnd1	190.894	-0.569017	0.430704	-1.32113	0.186457	0.945896
ENSMUSG00000019767	Ccdc170	6.07038	0.515411	1.63983	0.314308	0.753287	0.9908
ENSMUSG00000019768	Esr1	8.74667	0.185391	1.84892	0.10027	0.92013	0.997187
ENSMUSG00000019773	Fbxo5	10653	0.56728	0.328636	1.72616	0.084318	0.874166
ENSMUSG00000019774	Mtrf1l	545.745	-0.317998	0.30782	-1.03307	0.301573	0.955214
ENSMUSG00000019775	Rgs17	0.671622	2.89118	3.9746	0.727414	0.466972	NA
ENSMUSG00000019777	Hdac2	2032.84	-0.11658	0.297973	-0.391244	0.695617	0.98501
ENSMUSG00000019782	Rwdd1	676.586	-0.387256	0.414517	-0.934235	0.350183	0.963904
ENSMUSG00000019785	Clvs2	0.537297	2.57441	3.99083	0.64508	0.518876	NA
ENSMUSG00000019789	Hey2	26.9553	-0.210247	0.974734	-0.215696	0.829224	0.992975
ENSMUSG00000019790	Stxbp5	1199.74	0.034426	0.317681	0.108367	0.913705	0.996739
ENSMUSG00000019791	Hint3	273.871	0.511903	0.385364	1.32836	0.184058	0.945896
ENSMUSG00000019792	Trmt11	371.333	0.191887	0.314686	0.609772	0.542013	0.977701
ENSMUSG00000019794	Katna1	929.104	-0.159845	0.30076	-0.531471	0.595092	0.978563
ENSMUSG00000019795	Pcmt1	3168.13	-0.181032	0.292557	-0.618791	0.536054	0.977178
ENSMUSG00000019797	1700021F05Rik	287.662	-0.357425	0.437156	-0.817614	0.413577	0.96752
ENSMUSG00000019802	Sec63	1181.97	0.0742277	0.262212	0.283083	0.777113	0.990929
ENSMUSG00000019804	Snx3	7062.27	-0.139562	0.309643	-0.450718	0.652193	0.980124
ENSMUSG00000019806	Aig1	55.4816	0.41977	0.834618	0.502949	0.615	0.979733
ENSMUSG00000019808	Adat2	113.88	0.209471	0.513477	0.407946	0.683313	0.984615
ENSMUSG00000019809	Pex3	315.592	0.0470826	0.373192	0.126162	0.899604	0.996237
ENSMUSG00000019810	Fuca2	627.967	0.0632311	0.394612	0.160236	0.872695	0.996155
ENSMUSG00000019813	Cep57l1	405.672	-0.395668	0.437847	-0.903668	0.366171	0.963904
ENSMUSG00000019814	Ltv1	707.143	-0.308798	0.420625	-0.734141	0.462863	0.973341
ENSMUSG00000019817	Plagl1	4.71855	5.67097	2.23235	2.54036	0.011074	NA
ENSMUSG00000019818	Cd164	3545.21	0.0993038	0.257159	0.386157	0.69938	0.985194
ENSMUSG00000019820	Utrn	2175.56	0.702264	0.593131	1.18399	0.236415	0.950383
ENSMUSG00000019822	Smpd2	41.8165	-0.0817824	0.759628	-0.107661	0.914264	0.996913
ENSMUSG00000019823	Mical1	287.058	0.450073	0.720382	0.62477	0.532122	0.976048
ENSMUSG00000019826	Zbtb24	289.216	-0.296362	0.319847	-0.926575	0.354147	0.963904
ENSMUSG00000019831	Wasf1	0.448921	2.33857	4.00532	0.583866	0.55931	NA
ENSMUSG00000019832	Rab32	63.4473	0.889614	0.955399	0.931143	0.351779	0.963904
ENSMUSG00000019836	Amd-ps4	106.293	0.212145	0.458394	0.462802	0.643506	0.980124
ENSMUSG00000019837	Gtf3c6	603.236	-0.312347	0.318342	-0.981168	0.32651	0.961452
ENSMUSG00000019838	Slc16a10	47555.9	-0.0228428	0.371625	-0.0614674	0.950987	0.997955
ENSMUSG00000029192	Tbc1d14	637.602	0.764966	0.34295	2.23055	0.0257111	0.642585
ENSMUSG00000019842	Traf3ip2	78.8338	1.03013	0.710294	1.45029	0.146979	0.940783
ENSMUSG00000046808	Atp10d	415.861	0.765137	0.368625	2.07565	0.0379264	0.727971
ENSMUSG00000019845	Tube1	334.356	0.0241526	0.340914	0.0708466	0.94352	0.997858
ENSMUSG00000019848	Popdc3	1.12248	-3.64405	3.94611	-0.923454	0.355771	NA
ENSMUSG00000019849	Prep	1679.15	-0.274762	0.308251	-0.891358	0.372737	0.963904
ENSMUSG00000033799	Fam208b	636.44	0.765163	0.325373	2.35165	0.0186904	0.58927
ENSMUSG00000019851	Perp	3.11538	-0.149623	2.75137	-0.0543812	0.956631	NA
ENSMUSG00000019852	Arfgef3	3.43595	-0.803215	2.68577	-0.299063	0.764892	NA
ENSMUSG00000019854	Reps1	594.709	0.385953	0.293744	1.31391	0.188877	0.945896
ENSMUSG00000019856	Fam184a	2.83449	4.92476	3.18445	1.54651	0.121983	NA
ENSMUSG00000019857	Asf1a	2152.73	-0.155897	0.31019	-0.502587	0.615255	0.979733
ENSMUSG00000019861	Gopc	220.842	0.103451	0.360168	0.287229	0.773937	0.990929
ENSMUSG00000019863	Qrsl1	181.54	-0.107783	0.495066	-0.217714	0.827652	0.992638
ENSMUSG00000019864	Rtn4ip1	385.323	-0.223573	0.332778	-0.671838	0.501687	0.974468
ENSMUSG00000019865	Nmbr	2.66078	-4.8869	3.19077	-1.53158	0.125627	NA
ENSMUSG00000019866	Crybg1	204.397	0.261417	0.496635	0.526377	0.598626	0.978563
ENSMUSG00000019868	Vta1	1126.01	-0.245029	0.291515	-0.840535	0.400608	0.96752
ENSMUSG00000019872	Smpdl3a	963.928	0.160543	0.283005	0.567282	0.570523	0.978134
ENSMUSG00000019873	Reep3	524.95	-0.0744672	0.311745	-0.238872	0.811205	0.991746
ENSMUSG00000019876	Pkib	54.4284	1.60995	0.994977	1.61807	0.105647	0.903228
ENSMUSG00000019877	Serinc1	24684.1	0.0522232	0.406425	0.128494	0.897758	0.996237
ENSMUSG00000019878	Hsf2	174.675	0.241791	0.378467	0.638868	0.522909	0.97479
ENSMUSG00000019883	Echdc1	237.753	-0.51904	0.54343	-0.955119	0.339518	0.963675
ENSMUSG00000019888	Mgat4c	2.15171	-3.55155	3.1119	-1.14128	0.253754	NA
ENSMUSG00000019889	Ptprk	19.2121	0.963765	0.889107	1.08397	0.278378	0.953915
ENSMUSG00000019891	Dcbld1	13.0492	0.234642	1.46262	0.160425	0.872546	0.996155
ENSMUSG00000019892	Lrriq1	2.10737	4.50071	3.49902	1.28628	0.198347	NA
ENSMUSG00000019894	Slc6a15	1.77007	4.27843	3.66922	1.16603	0.243601	NA
ENSMUSG00000019897	Ccdc59	875.003	-0.0391431	0.287465	-0.136167	0.89169	0.996237
ENSMUSG00000019907	Ppp1r12a	3603.24	0.301534	0.307654	0.980106	0.327034	0.961739
ENSMUSG00000019916	P4ha1	173.032	-0.0856973	0.502264	-0.170622	0.864521	0.996155
ENSMUSG00000019917	2021-09-10	3.47163	-0.287449	2.6684	-0.107724	0.914215	NA
ENSMUSG00000019920	Lims1	2626.84	-0.147413	0.296124	-0.497807	0.61862	0.979733
ENSMUSG00000019923	Zwint	6283.22	-0.175736	0.250773	-0.700777	0.483442	0.974468
ENSMUSG00000019927	Ube2d1	53.3539	0.559581	0.727832	0.768832	0.441993	0.970219
ENSMUSG00000019929	Dcn	2.98149	-5.05125	3.06835	-1.64624	0.099714	NA
ENSMUSG00000019933	Mrln	1.74622	4.25545	3.93346	1.08186	0.279315	NA
ENSMUSG00000019935	Slc17a8	25.5523	0.839624	0.907699	0.925002	0.354965	0.963904
ENSMUSG00000019942	Cdk1	9253.56	-0.0774756	0.312838	-0.247655	0.804402	0.991746
ENSMUSG00000019943	Atp2b1	977.094	0.571531	0.324556	1.76096	0.0782444	0.866125
ENSMUSG00000019944	Rhobtb1	10.382	-0.128403	1.52305	-0.0843066	0.932813	0.997825
ENSMUSG00000045671	Spred2	621.293	0.765413	0.312166	2.45194	0.0142089	0.543248
ENSMUSG00000019948	Actr6	159.943	-0.445474	0.49365	-0.90241	0.366839	0.963904
ENSMUSG00000019951	Uhrf1bp1l	1086.63	0.0251712	0.434285	0.0579601	0.95378	0.997955
ENSMUSG00000019952	Poc1b	332.101	-0.0117353	0.339027	-0.0346145	0.972387	0.999164
ENSMUSG00000019960	Dusp6	169.805	-0.157931	0.722161	-0.218693	0.826889	0.992346
ENSMUSG00000019961	Tmpo	22868.8	0.0453507	0.26093	0.173804	0.862019	0.996155
ENSMUSG00000019966	Kitl	0.537297	2.57441	3.99083	0.64508	0.518876	NA
ENSMUSG00000019969	Psen1	1593.5	0.207776	0.272459	0.762595	0.445705	0.970219
ENSMUSG00000019970	Sgk1	355.985	-0.220225	0.323533	-0.680689	0.496068	0.974468
ENSMUSG00000019971	Cep290	931.212	0.526401	0.337877	1.55797	0.119241	0.921023
ENSMUSG00000019975	Ikbip	43.0594	0.296561	1.05643	0.280721	0.778924	0.990929
ENSMUSG00000019977	Hbs1l	5085.3	-0.282269	0.272813	-1.03466	0.300827	0.955214
ENSMUSG00000019978	Epb41l2	357.657	0.251931	0.422095	0.59686	0.550601	0.977701
ENSMUSG00000019979	Apaf1	1484.72	0.224226	0.311545	0.719721	0.471697	0.973341
ENSMUSG00000019982	Myb	560.786	-0.0368175	0.416778	-0.0883383	0.929608	0.997473
ENSMUSG00000019984	Med23	1139.14	0.162047	0.301609	0.537276	0.591077	0.978563
ENSMUSG00000019986	Ahi1	1547	-0.3358	0.292076	-1.1497	0.250267	0.951363
ENSMUSG00000019987	Arg1	10.7117	-1.41592	1.28842	-1.09895	0.271788	0.953915
ENSMUSG00000019988	Nedd1	1489.07	-0.104703	0.277773	-0.376938	0.706219	0.985284
ENSMUSG00000019989	Enpp3	141.845	0.557541	0.415718	1.34115	0.179871	0.944283
ENSMUSG00000019990	Pde7b	3.07132	0.415966	2.78833	0.149181	0.881411	NA
ENSMUSG00000019992	Mtfr2	984.907	0.0141332	0.303432	0.0465777	0.96285	0.998543
ENSMUSG00000019996	Map7	216.771	-0.285032	0.418018	-0.681866	0.495324	0.974468
ENSMUSG00000019997	Ctgf	4.16923	-5.53571	3.26949	-1.69314	0.0904286	NA
ENSMUSG00000019998	Stx7	933.216	-0.0380888	0.298446	-0.127624	0.898447	0.996237
ENSMUSG00000020000	Moxd1	0.861448	3.17235	3.9628	0.800533	0.423402	NA
ENSMUSG00000020003	Pex7	231.669	-0.462248	0.491546	-0.940395	0.347015	0.963904
ENSMUSG00000020007	Il20ra	27.7468	-0.241918	0.773189	-0.312884	0.754369	0.990929
ENSMUSG00000020009	Ifngr1	439.739	0.343691	0.450893	0.762245	0.445914	0.970219
ENSMUSG00000020010	Vnn3	1.20892	3.72914	3.94507	0.945265	0.344523	NA
ENSMUSG00000071796	6820431F20Rik	748.159	0.767855	0.362505	2.11819	0.0341586	0.708128
ENSMUSG00000020015	Cdk17	2597.18	0.234293	0.274031	0.854985	0.392559	0.966617
ENSMUSG00000020017	Hal	12.1411	1.58946	1.73795	0.914561	0.360422	0.963904
ENSMUSG00000020018	Snrpf	2497.05	-0.451191	0.408661	-1.10407	0.269562	0.953915
ENSMUSG00000020019	Ntn4	536.169	0.0325052	0.404243	0.0804101	0.935911	0.997825
ENSMUSG00000020020	Usp44	104.444	0.483895	0.585007	0.827161	0.408146	0.96752
ENSMUSG00000020021	Fgd6	1327.69	0.0611401	0.435504	0.14039	0.888352	0.996237
ENSMUSG00000020022	Ndufa12	1820.83	-0.207437	0.278696	-0.744311	0.456689	0.9722
ENSMUSG00000020023	Tmcc3	43.4936	0.650169	1.06489	0.61055	0.541497	0.977582
ENSMUSG00000020024	Cep83	1716.79	-0.151986	0.300791	-0.50529	0.613355	0.979733
ENSMUSG00000020027	Socs2	129.515	-0.220311	0.559763	-0.393579	0.693892	0.984615
ENSMUSG00000020029	Nudt4	38540.7	-0.144502	0.275273	-0.524941	0.599624	0.978563
ENSMUSG00000020032	Nuak1	10.3558	2.27823	1.65885	1.37338	0.169635	0.940783
ENSMUSG00000020034	Tcp11l2	38296	-0.042677	0.418439	-0.101991	0.918764	0.997187
ENSMUSG00000029638	Glcci1	875.555	0.767962	0.355836	2.15819	0.0309131	0.681096
ENSMUSG00000020042	Btbd11	10.8041	-0.0709386	1.76538	-0.0401833	0.967947	0.999139
ENSMUSG00000020044	Timp3	4.20571	-5.54841	2.79706	-1.98366	0.0472937	NA
ENSMUSG00000020048	Hsp90b1	12915.3	0.293281	0.321586	0.911984	0.361777	0.963904
ENSMUSG00000020051	Pah	2.29719	4.62049	3.92753	1.17644	0.239421	NA
ENSMUSG00000055866	Per2	295.165	0.768436	0.372156	2.06482	0.0389399	0.733637
ENSMUSG00000020056	Washc3	196.611	-0.495625	0.482332	-1.02756	0.304157	0.955877
ENSMUSG00000020057	Dram1	19.0248	-1.11665	1.38958	-0.803587	0.421636	0.96752
[truncated: 23,294 more rows]

## Sheet: B
Gene Set Name	# Genes in Gene Set (K)	Description	# Genes in Overlap (k)	k/K	p-value	FDR q-value
KEGG_CELL_ADHESION_MOLECULES_CAMS	133	Cell adhesion molecules (CAMs)	12	0.0902	1.68e-07	2.67e-05
KEGG_PATHWAYS_IN_CANCER	325	Pathways in cancer	18	0.0554	2.87e-07	2.67e-05
KEGG_MAPK_SIGNALING_PATHWAY	267	MAPK signaling pathway	15	0.0562	2.34e-06	0.000145
KEGG_JAK_STAT_SIGNALING_PATHWAY	155	Jak-STAT signaling pathway	10	0.0645	3.51e-05	0.00163
KEGG_PRION_DISEASES	35	Prion diseases	5	0.1429	8.11e-05	0.00252

## Sheet: C
NAME	GS<br> follow link to MSigDB	GS DETAILS	SIZE	ES	NES	FDR	RANK AT MAX	LEADING EDGE
KEGG_JAK_STAT_SIGNALING_PATHWAY	KEGG_JAK_STAT_SIGNALING_PATHWAY	Details ...	47	0.455565	1.4129	0.0414778	889	tags=28%, list=8%, signal=30%

## Sheet: D
Gene_name	WT_average	Fundc1-/-_average
Akt1	12.1322	11.827
Akt2	5.70821	4.73363
Akt3	1.9786	1.74101
Cbl	1.89293	1.32435
Cblb	0.805503	0.345599
Ccnd1	0.15676	0.104655
Ccnd2	1.25041	1.4787
Ccnd3	11.5872	13.0198
Cish	5.93868	8.17333
Clcf1	0.146897	0.127891
Cntf	0.155314	0.131626
Crebbp	2.41372	1.7644
Crlf2	5.62414	2.94861
Csf3	2.26836	2.03216
Ep300	0.0190017	0.016915
Epor	9.90252	6.08525
Grb2	79.9349	102.43
Ifna2	9.92178	9.04851
Ifnar1	0.0286717	0
Ifnar2	5.76531	5.4487
Ifnb1	12.6863	13.5312
Ifng	0.0305243	0.139351
Ifngr1	0.166002	0.088064
Ifngr2	1.91507	1.47675
Ifnlr1	7.29455	5.19037
Il10	0.0178733	0.0243897
Il11	0.115295	0.205501
Il4	0.0461399	0
Il6	0.0650399	0.0993052
Irf9	0.140815	0.0997083
Jak1	12.0578	9.08764
Jak2	20.7401	21.4698
Jak3	13.2954	10.8169
Lepr	0.793326	0.731956
Lifr	0.0190845	0.00639478
Myc	0.0749943	0.0139754
Osm	2.07175	1.93988
Pias1	2.31379	3.02335
Pias2	3.25292	2.75254
Pias3	1.57501	1.56443
Pias4	0.574935	0.571711
Pim1	7.20249	7.16172
Ptpn11	355.231	554.5
Ptpn6	8.71272	7.78898
Socs1	4.25564	4.58911
Socs2	0.406394	0.534966
Socs3	0.152306	0.149545
Socs4	8.65181	13.362
Socs5	4.46102	3.62588
Socs7	0.134494	0.0887843
Sos1	1.48578	1.13912
Sos2	1.21807	0.807204
Spred1	1.20372	0.814017
Spred2	1.42891	0.843736
Spry1	1.75434	1.03714
Spry2	0.148127	0.190022
Spry4	0.177171	0.07745
Stam	0.0612427	0.0347963
Stam2	2.80463	2.86644
Stat1	0.549255	0.502424
Stat2	5.78966	4.37006
Stat3	1.82869	1.23345
Stat4	0.91964	0.613437
Stat6	0.28652	0.0984878
Tslp	3.39815	2.8982
Tyk2	0.024944	0.050477
	1.00565	0.697564

## Sheet: E
sorted R2 population in spleen after PHZ treatment
	Crebbp			Ep300			Irf9			Spred2
	WT	Fundc1-/-		WT	Fundc1-/-		WT	Fundc1-/-		WT	Fundc1-/-
	1.20364	0.545263		1.10591	0.655075		1.10337	0.710539		0.901307	0.518647
	0.869252	0.587954		0.863003	0.73559		0.853355	0.694344		1.1088	0.6226
	1.06358	0.594156		1.05151	0.740151		1.23273	0.619635		1.15258	0.865776
	0.831519	1.05783		0.893197	0.886537		0.876999	0.940174		0.842291	0.908165
	1.08369	0.644225		1.01096	0.874422		0.980219	0.505708		0.987413	0.624046
p value	0.0244736			0.012291			0.0140815			0.0165198

## Sheet: F-G
sorted R2 population in spleen after PHZ treatment
	STAT3-P/total STAT3					STAT5-P/total STAT3
	PBS		PHZ			PBS		PHZ
	WT	Fundc1-/-	WT	Fundc1-/-		WT	Fundc1-/-	WT	Fundc1-/-
	0.37274	0.178109	1.20935	0.707401		0.20367	0.271352	1.10267	0.913245
	0.353623	0.305074	0.957421	0.885372		0.249966	0.388063	1.24919	0.786872
	0.390517	0.343254	1.27729	0.822255		0.231557	0.30343	1.6371	0.909663
p value	0.130721		0.035943			0.068228		0.0492973

## Sheet: H
sorted R2 population in spleen after PHZ treatment
	Epor
	PBS		PHZ
	WT	Fundc1-/-	WT	Fundc1-/-
	1.07739	1.12544	4.07233	3.90542
	0.98772	0.98892	2.14717	2.07172
	0.95897	1.00772	1.29536	2.50513
	0.97921	0.99652	3.24965	4.99743
	0.99721	1.01082	2.23984	2.59321
p value	0.448741		0.421142

## Sheet: I
EPO concentration in serum after PHZ treatment (pg/mL)
	PBS		PHZ
	WT	Fundc1-/-	WT	Fundc1-/-
	293.233	246.679	4546.88	4113.3
	323.621	190.432	4908.92	2980.88
	273.221	236.667	4740.36	3913.2
	260.112	283.383	4380.89	3224.78
	259.278	249.791	4605.4	4443.22
p value	0.0685153		0.0141358

## Sheet: K
RBC					HGB
PHZ+PBS		PHZ+EPO			PHZ+PBS		PHZ+EPO
WT	Fundc1-/-	WT	Fundc1-/-		WT	Fundc1-/-	WT	Fundc1-/-
5.88	5.32	6.08	6.01		117	103	123	119
5.68	5.58	6.05	5.81		110	105	119	121
5.51	5.26	6	5.89		110	103	123	125
5.84	5.27	5.85	6.29		115	110	133	120
	5.5	5.93				92	119
0.0136995		0.967243		p value	0.0256821		0.357671		p value

## Sheet: L
R2 population in spleen
	PHZ+PBS		PHZ+EPO
	WT	Fundc1-/-	WT	Fundc1-/-
	6.13	2.16	8.32	7.92
	3.58	1.91	9.5	12.1
	4	1.15	13.8	7.79
	4.69	1.17	13.5	10.8
	5.8	4.21
p value	0.00657478		0.389681
