# Supplementary material for: Receptor-mediated mitophagy regulates EPO production and protects against renal anemia
Source: eLife. 2021 May 4;10:e64480. doi: 10.7554/eLife.64480 (PMC8121547; doi:10.7554/eLife.64480)
Supplement: Figure 3—figure supplement 1—source data 1. [file elife-64480-fig3-figsupp1-data1.xlsx]

## Sheet: D
Vegf					Slc2a1
	PBS		PHZ			PBS		PHZ
	WT	Fundc1-/-	WT	Fundc1-/-		WT	Fundc1-/-	WT	Fundc1-/-
	0.91	0.81	1.46	1.84		0.73	0.67	1.3	1.13
	0.88	0.83	1.33	1.62		1.25	1.38	2.39	1.15
	1.1	1.36	1.24	0.92		1.29	1.13	1.04	2.6
	1	0.9	1.2	1.3		0.9	0.94	1.4	1.4
	1.1	0.94	1.2	1.1		0.97	0.95	1.28	1.26
p value	0.793443		0.699472			0.931743		0.944677

## Sheet: E
		PBS		PHZ
		WT	Fundc1-/-	WT	Fundc1-/-
		1	2	6	10
		2	1	7	10
		1	1	9	13
		0	1	13	9
			1
	p value	0.651691		0.361908
