# Supplementary material for: Receptor-mediated mitophagy regulates EPO production and protects against renal anemia
Source: eLife. 2021 May 4;10:e64480. doi: 10.7554/eLife.64480 (PMC8121547; doi:10.7554/eLife.64480)
Supplement: Figure 3—source data 1. [file elife-64480-fig3-data1.xlsx]

## Sheet: A
Days	WT				Fundc1-/-				p value
0	0.804017	1.04115	1.18201	0.992838	1.02249	1.01686	1.39675	0.68544	0.882776
1	174.906	172.398	148.128	309.923	208.218	95.5192	217.922	116.826	0.419862
2	153.02	153.157	123.35	97.0202	44.0611	85.9817	52.1771	62.1005	0.00489626
3	57.6542	160.332	184.851	185.617	61.1891	71.8024	119.425	120.062	0.16471

## Sheet: B
Lcn2						Kim1
	PBS		PHZ				PBS		PHZ
	WT	Fundc1-/-	WT	Fundc1-/-			WT	Fundc1-/-	WT	Fundc1-/-
	0.99	1	4.73317	85.1816			0.9897	1.01021	13.0857	32.319
	1.1	0.99	14.9977	39.69			1.0903	0.9892	16.1189	150.392
	0.98	0.98	20.4642	137.265			0.9921	0.97221	52.8662	51.4676
	0.99	0.97	37.4186	84.9832			0.9892	0.89342	10.7503	126.007
	0.99	1	28.2382	83.2921			0.8921	0.9921	24.2169	62.8837
p value	0.373166		0.00424319				0.62067		0.0342439

## Sheet: D
score
	PBS		PHZ
	WT	Fundc1-/-	WT	Fundc1-/-
	1	1.2	0.78	0.95
	1.2	1	0.81	0.98
	0.9	1	0.92	1
	1	1.1	0.88	0.9
	0.9	0.8	0.9	0.92
p value	0.821991		0.0224786

## Sheet: E-F
	PBS		PHZ
TIMM23	WT	Fundc1-/-	WT	Fundc1-/-
	1.00416	1.03945	0.872595	1.29662
	0.896746	1.02415	1.01776	1.1235
	1.1565	1.28903	0.91932	1.3365
p value	0.437586		0.0156025
COXIV	0.977214	1.19029	0.962045	1.18716
	0.865581	1.33285	1.05874	1.34831
	1.19855	0.925601	0.815482	1.25833
p value	0.428504		0.0196343
TOMM20	1.2027	1.32272	0.56896	1.28016
	1.00986	1.02523	0.754885	1.08705
	0.798259	1.08444	1.03262	1.33717
p value	0.396159		0.0437775
LC3II/LC3I	0.802412	0.902731	1.40239	1.38202
	1.18372	1.03829	1.50298	1.2903
	0.98782	1.10902	1.5923	1.25211
p value	0.849849		0.0463957

## Sheet: G
Atp5d	PBS		PHZ
	WT	Fundc1-/-	WT	Fundc1-/-
	1.06531	0.969555	1.42236	1.1091
	0.931665	1.14587	1.05365	0.633936
	1.0012	0.987876	0.6	1.18028
	1.0921	1.02127	1.04976	1.09357
	0.9981	1.00837	0.7059	0.99834
p value	0.837081		0.838986
Nrf1
	0.78022	1.00653	0.710654	1.44319
	1.06174	1.11	0.758975	1.20267
	1.221	1.27383	1.051	0.693454
	0.9982	0.998322	1.21939	1.45247
	1.08934	0.9983	1.25671	0.787765
p value	0.613027		0.569497
Tfam
	0.874286	1.03431	0.411635	0.904259
	0.850752	0.628591	0.415301	0.603875
	1.402	1.47562	1.12803	1.1093
	0.9982	1.00934	1.8333	1.06933
	0.9834	1.0983	1.20569	1.45041
p value	0.873579		0.926742

## Sheet: H-J
Total mtDNA
	PBS		PHZ
	WT	Fundc1-/-	WT	Fundc1-/-
	1.27539	1.41841	0.640507	0.741413
	0.970216	0.6639	0.612542	1.32776
	0.862695	1.27144	0.642667	1.09052
	0.947698	1.23821	0.806083	1.06774
	0.989183	1.10814	0.734269	0.801701
p value	0.397847		0.0219246
Il6
	1.60834	0.665942	4.01471	37.6962
	0.685477	1.36097	3.40328	8.52879
	1.0923	1.00998	8.21347	12.7934
	0.98954	0.8921	4.23596	10.9038
	1.00948	1.19038	4.29316	26.9024
p value	0.788617		0.033159
Cytosolic mtDNA
	1.12208	1.0253	0.927478	1.78841
	0.859109	1.09337	1.16491	1.52367
	1.09998	0.924827	1.04005	1.24384
	0.99834	0.9982	0.922546	1.2308
	1.092	1.09967	1.00832	1.20878
p value	0.920348		0.0129667
Il1b
	1.35821	1.10013	1.10762	1.88302
	0.704738	0.948903	0.985949	2.73687
	0.99037	1.00934	0.837705	1.32104
	1.02934	1.02987	1.16427	2.24903
	1.00932	0.9894	1.92732	2.04862
p value	0.979202		0.0224544
Tnfa
	0.840652	1.00521	1.90426	2.09342
	0.805996	0.673064	1.02004	2.2693
	1.29343	1.20934	1.20845	2.25715
	1.20943	1.20645	1.6037	1.99821
	0.99846	0.99736	1.09837	1.44853
p value	0.936652		0.0207643
