# Supplementary material for: Receptor-mediated mitophagy regulates EPO production and protects against renal anemia
Source: eLife. 2021 May 4;10:e64480. doi: 10.7554/eLife.64480 (PMC8121547; doi:10.7554/eLife.64480)
Supplement: Figure 4—figure supplement 1—source data 1. [file elife-64480-fig4-figsupp1-data1.xlsx]

## Sheet: C
mitoKeima
	PBS		PHZ_10μM		PHZ_100μM
	WT	Fundc1-/-	WT	Fundc1-/-	WT	Fundc1-/-
	1.00568	1.02	1.11194	1.21181	1.32044	1.23886
	0.987744	0.90902	1.12887	1.09069	1.34252	1.29139
	1.05028	1.01046	1.14478	1.14057	1.38004	1.28505
	1.08803	1.06461	1.14207	1.11953	1.40908	1.37108
				1.15044	1.41357	1.27804
					1.37778	1.15217
						1.265
p value	0.454031		0.665954		0.00520804

## Sheet: D
Epo mRNA
	PBS		PHZ_10μM		PHZ_100μM
	WT	Fundc1-/-	WT	Fundc1-/-	WT	Fundc1-/-
	1.13377	0.924151	1.0689	0.699008	0.76756	0.559209
	0.899581	0.876839	0.87383	0.757657	0.699839	0.557044
	0.899014	0.981054	0.797357	0.641039	0.892867	0.716463
	0.918084	0.902203	0.663362	0.809205	0.802321	0.592132
p value	0.523697		0.226712		0.0153946
