# Supplementary material for: Receptor-mediated mitophagy regulates EPO production and protects against renal anemia
Source: eLife. 2021 May 4;10:e64480. doi: 10.7554/eLife.64480 (PMC8121547; doi:10.7554/eLife.64480)
Supplement: Figure 4—source data 1. [file elife-64480-fig4-data1.xlsx]

## Sheet: A
score
	PBS		PHZ
	WT	Fundc1-/-	WT	Fundc1-/-
	1	2	4	8
	1	1	3	7
	2	2	6	10
	1	1	4	8
	1	1	5	5
p value	0.544737		0.0102886

## Sheet: D
Epo mRNA
PDGFRβ-	PDGFRβ+
1	8.1
1.1	7.1
0.9	7.5
		2.45284e-05	p value

## Sheet: E-F
	normoxia		hypoxia
TIMM23	WT	Fundc1-/-	WT	Fundc1-/-
	1.00133	1.03917	0.643794	0.900378
	1.0015	1.11305	0.609386	0.791659
	1.01635	0.992487	0.577587	0.685955
p value	0.303231		0.0480437
COXIV
	1.00116	1.05082	0.64113	0.927358
	1.00213	1.20735	0.643421	0.82989
	1.0009	0.906668	0.567203	0.710108
p value	0.570784		0.0386196
TOMM20
	0.997557	1.03959	0.451927	0.704904
	1.00013	1.11493	0.576681	0.8238
	1.00032	0.902291	0.513255	0.635447
p value	0.768622		0.0343343
LC3II/LC3I
	1.0532	1.00204	1.73802	1.63131
	0.9982	1.02	1.8212	1.6102
	1.0092	0.98	1.8901	1.582
p value	0.392829		0.0107192

## Sheet: H
mitoKeima
	PBS		PHZ
	WT	Fundc1-/-	WT	Fundc1-/-
	0.990305	1.01339	1.1819	1.08264
	1.08957	0.918744	1.26039	1.17728
	0.858726	1.16113	1.29501	1.21653
	1.02724	0.951062	1.27655	1.13804
	1.03416	1.03647	1.16574	1.03647
p value	0.784268		0.0341387

## Sheet: I
Total mtDNA
	PBS		PHZ
	WT	Fundc1-/-	WT	Fundc1-/-
	1.05	1.26	1.16	1.3
	0.84	1.04	0.99	1.49
	1.03	0.85	1.18	1.65
	1.09	0.98	1.2	1.2
	0.99	1.02	1.1	1.28
p value	0.714428		0.0210612

## Sheet: G;J;K
mitochondria mass
	PBS		PHZ
	WT	Fundc1-/-	WT	Fundc1-/-
	0.94	1.03	0.76	0.9
	1.04	1.18	0.83	0.85
	1.02	1.14	0.76	0.85
	1.01	0.98	0.78	0.88
	0.99	1.02	0.8	0.8
p value	0.132801		0.0115844
mitochondria ROS
	1.03	0.83	1.04	1.64
	0.77	1.01	1.21	1.45
	1.2	1.22	1.21	1.35
	1.03	0.98	1.21	1.34
	0.98	1	1.35	1.48
p value	0.950082		0.00958093
mitochondria potential
	1.01	0.94	0.89	0.63
	0.91	1.01	0.75	0.61
	1.08	1.13	0.7	0.69
	1.06	0.99	0.6	0.36
	0.95	1.01	0.89	0.54
p value	0.76282		0.0366276

## Sheet: L-M
	PBS		PHZ
Il1b	WT	Fundc1-/-	WT	Fundc1-/-
	1.01287	1.15453	1.26408	2.07333
	1.03132	0.922967	1.47401	2.14756
	0.949247	1.09384	1.32475	2.05149
	0.92834	1.00924	1.35375	1.96508
	1.20932	0.99321	0.554535	1.01553
p value	0.897173		0.0392986
Il6
	1.06225	1.07377	2.60686	3.24886
	1.00187	1.14038	2.43849	2.38189
	1.09273	1.0249	2.09323	3.79485
	0.972373	0.99832	2.61533	3.29126
	1.09232	1.0923	1.31276	3.71848
p value	0.553819		0.0155074
Epo
	0.76	0.55	77.97	15.34
	0.89	1.31	27.81	24.85
	1.48	0.89	66	16.91
	1.02	1.04	41.97	22.3
	0.99	1.09	18.67	18.75
p value	0.77423		0.0455128
