# Supplementary material for: Receptor-mediated mitophagy regulates EPO production and protects against renal anemia
Source: eLife. 2021 May 4;10:e64480. doi: 10.7554/eLife.64480 (PMC8121547; doi:10.7554/eLife.64480)
Supplement: Figure 5—source data 1. [file elife-64480-fig5-data1.xlsx]

## Sheet: C
	Sham		UUO
	WT	Fundc1-/-	WT	Fundc1-/-
a-Sma	0.943034	0.954929	5.83514	7.80462
	1.11744	1.32238	5.34198	10.3218
	1	1.02	7.57609	11.1021
	0.98	0.92	4.73218	9.06884
	1.2	1.012
p value	0.979942		0.00789657
Col1a1
	0.941995	0.742426	4.32968	31.0029
	1.0536	1.60065	21.5742	32.4444
	1	1	17.1177	24.1864
	1	1	15.0012	19.1396
	1.17929	0.98	12	19
p value	0.846414		0.0249223

## Sheet: D
	Sham		UUO
TIMM23	WT	Fundc1-/-	WT	Fundc1-/-
	1.11594	0.999524	0.467144	0.603816
	0.965739	0.962552	0.354988	0.535651
	1.08357	1.03792	0.374467	0.491117
p value	0.337192		0.0385684
TOMM20
	1.0106	0.929779	0.33871	0.417857
	1.03717	1.12199	0.234464	0.38214
	0.999791	1.21615	0.320459	0.395383
p value	0.436234		0.0408722
COXIV
	1.08635	1.0425	0.205662	0.342667
	1.0247	0.972603	0.252417	0.48979
	1.11389	0.984897	0.273436	0.43753
p value	0.092445		0.0194442

## Sheet: E
	Sham		UUO
	WT	Fundc1-/-	WT	Fundc1-/-
Il6	2.2	0.81	99.91	88.6
	0.18	0.83	57.39	175.4
	1.27	1.48	69.85	105.07
	1.10063	1.281	57.7	92.38
	1.00254	1.99341	34.15	100.56
p value	0.751202		0.0357023
Il1b	0.772287	0.853257	4.58438	6.84712
	0.733614	1.07017	5.34718	5.05884
	1.00254	1.99341	3.81579	10.6093
	1.03381	0.807962	4.72781	9.52008
	1.10063	1.281
p value	0.265201		0.0402662

## Sheet: F-H
	Sham		UUO
	WT	Fundc1-/-	WT	Fundc1-/-
mitochondria mass	1.06	1.16	0.86	0.97
	0.96	0.97	0.61	0.67
	0.99	0.9	0.6	0.64
	1.02	1.02	0.59	0.83
	0.98	1.09	0.7	0.61
p value	0.606913		0.421732
mitochondria ROS	0.77	1.33	0.72	0.69
	0.75	0.52	0.37	0.89
	1.48	1.24	0.58	0.54
	1.39	0.98	0.49	0.75
	0.97	0.96	0.5	0.96
p value	0.759976		0.0375926
mitochondria potential	0.97	0.48	0.79	0.68
	1.37	1.26	1.31	0.37
	0.66	1.69	0.85	0.94
	1.08	0.87	0.77	0.55
	1.02	0.98	1.02	0.61
p value	0.880388		0.0488539

## Sheet: I
EPO	Sham		UUO
	WT	Fundc1-/-	WT	Fundc1-/-
	1	1	0.494313	0.301774
	1.00702	0.98	0.5	0.5
	0.98	0.99	0.415517	0.334534
	0.91	1.021	0.52	0.3
	1.12	1.1	0.537015	0.371483
p value	0.721784		0.0145898
Dnmt1	0.999868	0.959876	1.18031	1.42074
	1.01484	1.02772	1.2471	1.31719
	1	1	1.12231	1.59204
	1	1	1.27321	1.93349
p value	0.655573		0.0413952
Dnmt3a	1.12595	1.05398	1.20726	0.928249
	0.935756	0.999999	0.969433	1.23573
	1	1	1.04653	2.30808
	1	1	1.19104	1.17753
p value	0.964836		0.359428
Dnmt3b	0.901459	1.00018	1.49743	1.7746
	1.02335	0.900026	1.25138	1.9352
	1	1	1.62691	2.72796
	1	1.1	1.56958	2.43096
p value	0.713866		0.0209291
