# Supplementary material for: Receptor-mediated mitophagy regulates EPO production and protects against renal anemia
Source: eLife. 2021 May 4;10:e64480. doi: 10.7554/eLife.64480 (PMC8121547; doi:10.7554/eLife.64480)
Supplement: Figure 6—source data 1. [file elife-64480-fig6-data1.xlsx]

## Sheet: B
RBC	PBS		Cisplatin				HGB
	WT	Fundc1-/-	WT	Fundc1-/-				160	167	138	114
	9.95	10.07	9.37	8.86				165	155	148	105
	10.18	9.38	9.88	8.88				160	167	142	135
	9.8	9.87	9.77	9.28				162	160	136	137
	9.9	9.6	9.75	6.9				165	159	147	138
	11	11	9.26	6.4				161	162	155	132
			9.44	8.66						148	151
			9.05	9.2						157	143
			9.56	8.87						158	154
			9.76	8.09						162	154
			9.63	9						155
			9.8							153
p value	0.621453		0.00128227				p value	0.820472		0.0193188

## Sheet: C
EPO(pg/mL)	PBS		Cisplatin
	WT	Fundc1-/-	WT	Fundc1-/-
	120.635	150.264	52.91	59.2592
	158.73	110.053	97.3544	23.2804
	165.079	154.497	52.91	29.6296
	124.868	126.984	76.1904	29.6296
	154.497		48.6772	16.9312
p value	0.522626		0.049358

## Sheet: D
	PBS		Cisplatin
	WT	Fundc1-/-	WT	Fundc1-/-
TOMM20	1.02	0.99	0.68	0.89
	0.98	1.1	0.59	0.8
	0.97	0.97	0.6	0.71
p value	0.525673		0.0406792
COXIV	0.99	0.98	0.57	0.71
	1	0.96	0.58	0.69
	0.98	1.01	0.64	0.68
p value	0.691761		0.0148382
LC3II/I	1	0.99	1.31	1.11
	0.98	0.98	1.21	1.19
	1.01	1.02	1.29	1.18
p value	1		0.0498643

## Sheet: E
	PBS		Cisplatin
Il6	WT	Fundc1-/-	WT	Fundc1-/-
	0.647971	0.55452	5.84413	6.22622
	1.27306	1.34741	9.87497	12.5928
	1.74848	0.828578	10.5055	16.4075
	0.526643	0.628188	4.89575	15.6807
	1.32316	1.04646	6.10628	12.8847
p value	0.43212		0.0372302
Il1b	1.6933	0.9955	3.55499	3.33207
	0.953116	1.77067	2.16844	6.29457
	1.14486	1.15389	1.16313	5.33108
	0.898767	1.36031	3.66253	4.10565
	0.609956	1.55815	3.08236
p value	0.212398		0.0355702
Tgfb1	1.20389	1.43867	1.77955	2.80006
	0.846297	1.09841	1.57947	1.84515
	1.21141	0.92047	1.9263	2.14031
	1.09422	0.942879	1.66715	2.65274
	0.730627	1.378	1.84023
p value	0.369269		0.0230004

## Sheet: F-G
mitoKeima	PBS		Cisplatin
	WT	Fundc1-/-	WT	Fundc1-/-
	0.81168	1.16017	1.80822	0.962252
	1.00389	1.07493	1.75846	1.10469
	0.948246	1.11517	1.69446	1.18511
	1.04828	0.944605	1.08064	1.24335
	1.21078	0.818057	1.83525	0.996893
	0.977235	0.887581	1.55788	1.28453
			1.46623	1.70918
			1.372	1.59489
p value	0.999338		0.00312099

## Sheet: H-J
	PBS		Cisplatin			mitochondria potential						mitochondria mass
mitochondria ROS	WT	Fundc1-/-	WT	Fundc1-/-
	0.962117	0.87717	1.43724	2.15612			0.924744	0.825588	0.821305	0.816593			1.03452	1.07411	0.575635	1.21421
	1.13834	0.747639	1.29557	1.89179			0.889301	1.04714	0.87613	0.666574			0.790863	1.45584	0.884264	0.923858
	1.12014	0.69092	1.70052	1.64354			1.15647	0.988671	0.946696	0.676211			1.17665	0.946193	0.738071	0.843655
	0.983485	1.40136	1.25732	1.76727			1.03654	1.0511	0.878164	0.820876			1.23756	1.19391	0.64264	0.890355
	0.795916	1.14837	1.52034				0.992954	1.13505	0.80899	0.819484			0.760406	1.31371	0.825381	1.13706
p value	0.859077		0.0152472				0.894743		0.0410531				0.174487		0.0198089

## Sheet: K-L
	PBS		Cisplatin			Tnfα						Epo
Il6	WT	Fundc1-/-	WT	Fundc1-/-
	0.922001	0.774736	1.93379	8.36218			0.97072	0.870263	2.71314	2.56602			1.10265	0.847469	0.532827	0.360669
	1.30069	0.986264	3.99636	7.52833			1.05665	1.35615	1.90357	3.09266			1.14418	1.06635	0.491219	0.400611
	0.953576	0.323223	6.41548	8.32206			0.955005	0.833491	2.33201	4.40777			0.887079	1.03146	0.403563	0.218681
	0.73906	0.840702	5.40727	18.845			0.831562	1.0186	2.41274	4.40738			1.06852	1.03393	0.513608	0.444943
	1.18945	0.872599	0.605156	5.51755			1.24107	0.988087	1.23346	4.83161			0.982672	0.965652	0.430725	0.21093
	0.123639		0.0468936				0.984355		0.00879254				0.448202		0.0255312
