# Supplementary material for: Receptor-mediated mitophagy regulates EPO production and protects against renal anemia
Source: eLife. 2021 May 4;10:e64480. doi: 10.7554/eLife.64480 (PMC8121547; doi:10.7554/eLife.64480)
Supplement: Supplementary file 1. [file elife-64480-supp1.xlsx]

## Sheet: Sheet1
	PBS			PHZ
	WT	Fundc1-/-	p value	WT	Fundc1-/-	p value
WBC (103/μL)	2.29±0.25	1.82±0.48	0.119	45.99±6.5	48.46±6.27	0.66
RBC(106/μL)	7.39±0.74	7.52±0.32	0.121	5.82±0.15	4.71±0.29	0.004
HGB(g/L)	158.75±5.69	164±8.50	0.285	94±3.61	81.33±4.04	0.015
HCT%	51.14±1.38	51.4±2.35	0.9	24.5±1.2	21.33±1.22	0.0328241
MCV(fL)	55.48±4.52	51.8±0.79	0.265	42.07±1	45.4±4.07	0.240705
Platelets (103/μL)	1135±100.08	1066.2±87.87	0.321	1283.67±83.34	1733.67±481.86	0.186188
MPV	5.85±0.12	5.77±0.06	0.507	6.87±0.12	6.97±0.15	0.416866
RET%	4.01±0.26	4.48±1.68	0.652	5.47±0.95	3.16±0.36	0.0167165
MCHC	323±1.53	314.8±12.5	0.1029	388±1.1	362±0.55	0.0224808
