# Supplementary material for: Receptor-mediated mitophagy regulates EPO production and protects against renal anemia
Source: eLife. 2021 May 4;10:e64480. doi: 10.7554/eLife.64480 (PMC8121547; doi:10.7554/eLife.64480)
Supplement: Supplementary file 2. [file elife-64480-supp2.xlsx]

## Sheet: Sheet1
mouse	Atp5d-F	GTCTACATCGGCTAGTGGAGCT
mouse	Atp5d-R	GACTTCTGAGCAACTCTCCACAG
mouse	Epo-F	CATCTGCGACAGTCGAGTTCTG
mouse	Epo-R	CACAACCCATCGTGACATTTTC
mouse	Il6-F	TGAACAACGATGATGCACTTGC
mouse	Il6-R	GCTATGGTACTCCAGAAGACC
mouse	Tnfa-F	CATCTTCTCAAAATTCGAGTGACAA
mouse	Tnfa-R	CCAGCTGCTCCTCCACTTG
mouse	Il1b-F	AAGCCTCGTGCTGTCGGACC
mouse	Il1b-R	TGAGGCCCAAGGCCACAGGT
mouse	Tgfβ1-F	TGATACGCCTGAGTGGCTGTCT
mouse	Tgfβ1-R	CACAAGAGCAGTGAGCGCTGAA
mouse	Mmp3-F	CTCTGGAACCTGAGACATCACC
mouse	Mmp3-R	AGGAGTCCTGAGAGATTTGCGC
mouse	Mmp9-F	GCTGACTACGATAAGGACGGCA
mouse	Mmp9-R	TAGTGGTGCAGGCAGAGTAGGA
mouse	Col1a1-F	CCTCAGGGTATTGCTGGACAAC
mouse	Col1a1-R	CAGAAGGACCTTGTTTGCCAGG
mouse	Acta2-F	TGCTGACAGAGGCACCACTGAA
mouse	Acta2-R	CAGTTGTACGTCCAGAGGCATAG
mouse	Epor-F	TTCAGCGGATTCTGGAGTGCCT
mouse	Epor-R	AGCAACAGCGAGATGAGGACCA
mouse	Lcn2-F	ATGTCACCTCCATCCTGGTCAG
mouse	Lcn2-R	GCCACTTGCACATTGTAGCTCTG
mouse	Kim1-F	CTGGAATGGCACTGTGACATCC
mouse	Kim1-R	GCAGATGCCAACATAGAAGCCC
mouse	Ndufs7-F	GGCTGAGTATGTGGTGACCAAG
mouse	Ndufs7-R	AGCCATGTGCATCATCTCCACG
mouse	Ctgf-F	TGCGAAGCTGACCTGGAGGAAA
mouse	Ctgf-R	CCGCAGAACTTAGCCCTGTATG
mouse	mt-Co1-F	GCCCCAGATATAGCATTCCC
mouse	mt-Co1-R	GTTCATCCTGTTCCTGCTCC
mouse	Dnmt1-F	CGGCTCAAAGACTTGGAAAG
mouse	Dnmt1-R	TAGCCAGGTAGCCTTCCTCA
mouse	Dnmt3A-F	ACCAGGCCACCTACAACAAG
mouse	Dnmt3A-R	TGCTTGTTCTGCACTTCCAC
mouse	Dnmt3B-F	ACTTGGTGATTGGTGGAAGC
mouse	Dnmt3B-R	CCAGAAGAATGGACGGTTGT
mouse	CoxI-F	CTGAGCGGGAATAGTGGGTA
mouse	CoxI-R	TGGGGCTCCGATTATTAGTG
mouse	CytB-F	ATTCCTTCATGTCGGACGAG
mouse	CytB-F	ACTGAGAAGCCCCCTCAAAT
mouse	H19-R	GTCCACGAGACCAATGACTG
mouse	H19-F	GTACCCACCTGTCGTCC
mouse	B1globin-F	GCACCTGACTGATGCTGAGAA
mouse	B1globin-R	TTCATCGGCGTTCACCTTTCC
mouse	Common_En2-R	CCAACTGACCTTGGGCAAGAACAT
mouse	Fundc1_zptF1	GTATGCTCAGGAGGTATAGGCTGAC
mouse	Common_3'F	CACACCTCCCCCTGAACCTGAAA
mouse	Fundc1_loxP_R2	CCTCATAAACATTCTTGCTAGCAA
mouse	mito- keima-F	GAGCAGACCGTGAAGCTGAC
mouse	mito- keima-R	GCCATGTAGTCGTTGCCGAT
